# Supplementary material for: Proposed Training to Meet Challenges of Large-Scale Data in Neuroscience
Source: Front Neuroinform. 2016 Jul 18;10:28. doi: 10.3389/fninf.2016.00028 (PMC4947577; doi:10.3389/fninf.2016.00028)
Supplement: Supplementary file 1 [file DataSheet_1.xlsx]

## Sheet: CollegeNavigator_Search_2015-09
		National Center for Education Statistics
		College Navigator
		Generated at:9/4/2015 11:19:59 AM from URL:http://nces.ed.gov/collegenavigator/default.aspx?s=all&p=11.0802&l=93&xp=1
Program category	Program level	Name	Address	Website	Type	Awards offered	Campus setting	Campus housing	Student population	Undergraduate students	Graduation Rate	Transfer-Out Rate	Cohort Year *	Net Price **	Largest Program	IPEDS ID	OPE ID
Data Modeling/Warehousing and Database Administration	Bachelors	Baker College Center for Graduate Studies	1116 W Bristol Rd, Flint, Michigan 48507	www.baker.edu	4-year, Private not-for-profit	One but less than two years certificate;Associate's degree;Bachelor's degree;Postbaccalaureate certificate;Master's degree;Doctor's degree - research/scholarship	Suburb: Large	No	4530	3976	20%	NA	Fall 2008	$14,033	-	414708	00467313
Data Modeling/Warehousing and Database Administration	Bachelors	Florida Polytechnic University	4700 Research Way, Lakeland, Florida 33805-8531	floridapolytechnic.org	4-year, Public	Bachelor's degree;Master's degree	Rural: Fringe	No	540	518	NA	NA	Fall 2008	NA	-	482936
Data Modeling/Warehousing and Database Administration	Bachelors	National College-Lexington	2376 Sir Barton Way, Lexington, Kentucky 40509	www.national-college.edu	4-year, primarily associate's, Private for-profit	Less than one year certificate;One but less than two years certificate;Associate's degree;Bachelor's degree	City: Large	No	979	979	35%	NA	Fall 2008	$18,043	-	157021	01048900
Data Modeling/Warehousing and Database Administration	Bachelors	University of Phoenix-Arizona	1625 West Fountainhead Parkway, Tempe, Arizona 85282	www.phoenix.edu	4-year, Private for-profit	Less than one year certificate;Associate's degree;Bachelor's degree;Postbaccalaureate certificate;Master's degree;Post-master's certificate;Doctor's degree - research/scholarship	City: Midsize	No	195059	155872	17%	NA	Fall 2008	$14,479	-	484613	02098800
Data Modeling/Warehousing and Database Administration	Bachelors	University of Phoenix-California	3090 Bristol Street, Costa Mesa, California 92626	www.phoenix.edu	4-year, Private for-profit	Less than one year certificate;Associate's degree;Bachelor's degree;Postbaccalaureate certificate;Master's degree;Post-master's certificate	City: Midsize	No	23257	19688	17%	NA	Fall 2008	$18,406	-	484631	22098812
Data Modeling/Warehousing and Database Administration	Bachelors	University of Phoenix-Colorado	10004 Park Meadows Dr, Lone Tree, Colorado 80124	www.phoenix.edu	4-year, Private for-profit	Less than one year certificate;Associate's degree;Bachelor's degree;Postbaccalaureate certificate;Master's degree;Post-master's certificate	Suburb: Large	No	1674	1351	16%	NA	Fall 2008	$18,260	-	484640	02098869
Data Modeling/Warehousing and Database Administration	Bachelors	University of Phoenix-Florida	8325 S Park Circle, Orlando, Florida 32819	www.phoenix.edu	4-year, Private for-profit	Less than one year certificate;Bachelor's degree;Postbaccalaureate certificate;Master's degree	Suburb: Large	No	3707	3059	18%	NA	Fall 2008	$18,110	-	484668	32098816
Data Modeling/Warehousing and Database Administration	Bachelors	University of Phoenix-Georgia	8200 Roberts Dr, Sandy Springs, Georgia 30350	www.phoenix.edu	4-year, Private for-profit	Bachelor's degree;Master's degree	City: Small	No	2837	2523	15%	NA	Fall 2008	$17,755	-	484677	32098829
Data Modeling/Warehousing and Database Administration	Bachelors	University of Phoenix-Indiana	7999 Knue Rd, Indianapolis, Indiana 46250-1932	www.phoenix.edu	4-year, Private for-profit	Bachelor's degree;Postbaccalaureate certificate;Master's degree	City: Large	No	290	275	9%	NA	Fall 2008	$17,984	-	443544	32098858
Data Modeling/Warehousing and Database Administration	Bachelors	University of Phoenix-Louisiana	2431 S Acadian Thruway, Baton Rouge, Louisiana 70808	www.phoenix.edu	4-year, Private for-profit	Less than one year certificate;Bachelor's degree;Master's degree	City: Midsize	No	1028	865	16%	NA	Fall 2008	$17,023	-	484686	32098864
Data Modeling/Warehousing and Database Administration	Bachelors	University of Phoenix-Michigan	26261 Evergreen Rd, Southfield, Michigan 48076	www.phoenix.edu	4-year, Private for-profit	Less than one year certificate;Associate's degree;Bachelor's degree;Master's degree;Post-master's certificate	City: Small	No	1361	1126	11%	NA	Fall 2008	$19,055	-	484695	32098879
Data Modeling/Warehousing and Database Administration	Bachelors	University of Phoenix-New Jersey	100 Town Square Pl, Jersey City, New Jersey 07310-1756	www.phoenix.edu	4-year, Private for-profit	Bachelor's degree	City: Midsize	No	371	371	13%	NA	Fall 2008	$17,429	-	445300	42098802
Data Modeling/Warehousing and Database Administration	Bachelors	University of Phoenix-Ohio	3401 Enterprise Pkwy, Beachwood, Ohio 44122-7343	www.phoenix.edu	4-year, Private for-profit	Bachelor's degree;Master's degree	Suburb: Large	No	542	483	11%	NA	Fall 2008	$20,115	-	439297	42098834
Data Modeling/Warehousing and Database Administration	Bachelors	University of Phoenix-Pennsylvania	30 S 17th St, Philadelphia, Pennsylvania 19103	www.phoenix.edu	4-year, Private for-profit	Bachelor's degree;Master's degree	City: Large	No	669	639	6%	NA	Fall 2008	$17,493	-	484783	42098854
Data Modeling/Warehousing and Database Administration	Bachelors	University of Phoenix-Texas	11451 Katy Freeway, Houston, Texas 77079	www.phoenix.edu	4-year, Private for-profit	Less than one year certificate;Bachelor's degree;Postbaccalaureate certificate;Master's degree	City: Large	No	5254	4486	16%	NA	Fall 2008	$18,794	-	484756	42098871
Data Modeling/Warehousing and Database Administration	Bachelors	University of Phoenix-Virginia	9750 W Broad St, Glen Allen, Virginia 23060	www.phoenix.edu	4-year, Private for-profit	Less than one year certificate;Bachelor's degree;Master's degree	Suburb: Large	No	1357	1115	12%	NA	Fall 2008	$17,159	-	484765	82098821
Data Modeling/Warehousing and Database Administration	Bachelors	Western Governors University	4001 East 700 South, Suite 700, Salt Lake City, Utah 84107	www.wgu.edu	4-year, Private not-for-profit	Bachelor's degree;Postbaccalaureate certificate;Master's degree	Suburb: Large	No	57821	44499	17%	30%	Fall 2008	$8,624	-	433387	03339400
		* Cohort Year represents the year for which students began their studies and applies to Graduation and Transfer Out Rates.
		** Net Price is Average Net Price for 2013-2014 generated for full-time beginning undergraduate students who were awarded grant or scholarship aid from federal, state or local governments, or the institution. For public institutions only students paying the in-state or in-district rate are included. For institutions that charge students by program, net price is generated for the institution’s lar…
		NA (Not applicable) - Graduation rate, transfer-out rate and the net price are not applicable to institutions that do not have full-time, first-time degree-seeking undergraduate students in the applicable cohort year or the financial aid year.
		National Center for Education Statistics
		College Navigator
		Generated at:9/4/2015 11:21:48 AM from URL:http://nces.ed.gov/collegenavigator/default.aspx?s=all&p=11.0802&l=92&xp=1
		Name	Address	Website	Type	Awards offered	Campus setting	Campus housing	Student population	Undergraduate students	Graduation Rate	Transfer-Out Rate	Cohort Year *	Net Price **	Largest Program	IPEDS ID	OPE ID
Data Modeling/Warehousing and Database Administration	Associates	American Public University System	111 W Congress St, Charles Town, West Virginia 25414	www.apus.edu	4-year, Private for-profit	Less than one year certificate;Associate's degree;Bachelor's degree;Postbaccalaureate certificate;Master's degree	Town: Fringe	No	57539	46997	46%	NA	Fall 2008	$9,572	-	449339	03819300
Data Modeling/Warehousing and Database Administration	Associates	American River College	4700 College Oak Dr, Sacramento, California 95841-4286	www.arc.losrios.edu/	2-year, Public	Less than one year certificate;One but less than two years certificate;Associate's degree;Two but less than 4 years certificate	Suburb: Large	No	29133	29133	27%	8%	Fall 2011	$7,838	-	109208	00123200
Data Modeling/Warehousing and Database Administration	Associates	Atlanta Technical College	1560 Metropolitan Pkwy SW, Atlanta, Georgia 30310-4446	www.atlantatech.edu/	2-year, Public	Less than one year certificate;One but less than two years certificate;Associate's degree;Two but less than 4 years certificate	City: Large	No	4282	4282	28%	NA	Fall 2011	$3,530	-	138840	00854300
Data Modeling/Warehousing and Database Administration	Associates	Bates Technical College	1101 S Yakima Ave, Tacoma, Washington 98405	www.bates.ctc.edu/	2-year, Public	Less than one year certificate;One but less than two years certificate;Associate's degree;Two but less than 4 years certificate	City: Midsize	No	2907	2907	50%	10%	Fall 2011	$5,347	-	235671	00530600
Data Modeling/Warehousing and Database Administration	Associates	Butler Community College	901 S Haverhill Rd, El Dorado, Kansas 67042-3280	www.butlercc.edu/	2-year, Public	Less than one year certificate;One but less than two years certificate;Associate's degree	Town: Distant	Yes	9003	9003	23%	28%	Fall 2011	$7,593	-	154800	00190600
Data Modeling/Warehousing and Database Administration	Associates	Central Piedmont Community College	1201 Elizabeth Avenue, Charlotte, North Carolina 28204	www.cpcc.edu	2-year, Public	Less than one year certificate;One but less than two years certificate;Associate's degree	City: Large	No	19957	19957	11%	31%	Fall 2011	$8,268	-	198260	00291500
Data Modeling/Warehousing and Database Administration	Associates	Chattahoochee Technical College	980 S Cobb Drive Dr SE, Marietta, Georgia 30060	www.chattahoocheetech.edu	2-year, Public	Less than one year certificate;One but less than two years certificate;Associate's degree;Two but less than 4 years certificate	Suburb: Large	No	9942	9942	6%	NA	Fall 2011	$2,904	-	140331	00562000
Data Modeling/Warehousing and Database Administration	Associates	Eastern Iowa Community College District	306 W River Dr, Davenport, Iowa 52801-1221	www.eicc.edu	2-year, Public	Less than one year certificate;One but less than two years certificate;Associate's degree	City: Small	No	8143	8143	28%	19%	Fall 2011	$9,126	-	153311	00407500
Data Modeling/Warehousing and Database Administration	Associates	Edmonds Community College	20000 68th Ave W, Lynnwood, Washington 98036-5912	www.edcc.edu	2-year, Public	Less than one year certificate;One but less than two years certificate;Associate's degree	Suburb: Large	Yes	8993	8993	28%	22%	Fall 2011	$7,981	-	235103	00500100
Data Modeling/Warehousing and Database Administration	Associates	Foothill College	12345 El Monte Rd, Los Altos Hills, California 94022	www.foothill.edu	2-year, Public	Less than one year certificate;One but less than two years certificate;Associate's degree;Two but less than 4 years certificate	Suburb: Large	No	15030	15030	56%	13%	Fall 2011	$6,590	-	114716	00119900
Data Modeling/Warehousing and Database Administration	Associates	Forsyth Technical Community College	2100 Silas Creek Pky, Winston Salem, North Carolina 27103-5197	www.forsythtech.edu/	2-year, Public	Less than one year certificate;One but less than two years certificate;Associate's degree	City: Midsize	No	9148	9148	11%	17%	Fall 2011	$4,549	-	198552	00531700
Data Modeling/Warehousing and Database Administration	Associates	Georgia Piedmont Technical College	495 N Indian Creek Dr, Clarkston, Georgia 30021-2397	www.gptc.edu	2-year, Public	Less than one year certificate;One but less than two years certificate;Associate's degree;Two but less than 4 years certificate	Suburb: Large	No	4050	4050	32%	NA	Fall 2011	$9,137	-	244446	00562200
Data Modeling/Warehousing and Database Administration	Associates	Lansing Community College	419 N Capitol Ave, Lansing, Michigan 48901-7210	www.lcc.edu	2-year, Public	Less than one year certificate;One but less than two years certificate;Associate's degree;Two but less than 4 years certificate	City: Midsize	No	16031	16031	11%	26%	Fall 2011	$5,476	-	170657	00227800
Data Modeling/Warehousing and Database Administration	Associates	Mississippi Gulf Coast Community College	51 Main Street, Perkinston, Mississippi 39573	https://www.mgccc.edu	2-year, Public	Less than one year certificate;One but less than two years certificate;Associate's degree	Rural: Distant	Yes	9799	9799	26%	17%	Fall 2011	$8,028	-	176071	00241700
Data Modeling/Warehousing and Database Administration	Associates	Mt Hood Community College	26000 SE Stark St, Gresham, Oregon 97030	www.mhcc.edu	2-year, Public	Less than one year certificate;One but less than two years certificate;Associate's degree;Two but less than 4 years certificate	Suburb: Large	No	9276	9276	23%	30%	Fall 2011	$9,674	-	209250	00320400
Data Modeling/Warehousing and Database Administration	Associates	Mt San Antonio College	1100 N Grand Ave, Walnut, California 91789-1399	www.mtsac.edu	2-year, Public	Less than one year certificate;One but less than two years certificate;Associate's degree;Two but less than 4 years certificate	Suburb: Large	No	29045	29045	31%	10%	Fall 2011	$4,294	-	119164	00124500
Data Modeling/Warehousing and Database Administration	Associates	Oklahoma City Community College	7777 S May Ave, Oklahoma City, Oklahoma 73159-9987	www.occc.edu	2-year, Public	Less than one year certificate;One but less than two years certificate;Associate's degree	City: Large	No	13444	13444	12%	17%	Fall 2011	$6,978	-	207449	01039100
Data Modeling/Warehousing and Database Administration	Associates	Quinsigamond Community College	670 West Boylston Street, Worcester, Massachusetts 01606-2092	www.qcc.edu	2-year, Public	Less than one year certificate;One but less than two years certificate;Associate's degree	City: Midsize	No	8452	8452	16%	16%	Fall 2011	$6,698	-	167534	00217500
Data Modeling/Warehousing and Database Administration	Associates	Rowan College at Gloucester County	1400 Tanyard Road, Sewell, New Jersey 08080	www.rcgc.edu	2-year, Public	Less than one year certificate;One but less than two years certificate;Associate's degree	Suburb: Large	No	7130	7130	22%	22%	Fall 2011	$6,999	-	184791	00690100
Data Modeling/Warehousing and Database Administration	Associates	South Puget Sound Community College	2011 Mottman Rd SW, Olympia, Washington 98512-6292	www.spscc.ctc.edu	2-year, Public	Less than one year certificate;One but less than two years certificate;Associate's degree;Two but less than 4 years certificate	City: Small	No	4881	4881	27%	18%	Fall 2011	$7,348	-	236656	00537200
Data Modeling/Warehousing and Database Administration	Associates	Southern Crescent Technical College	501 Varsity Rd, Griffin, Georgia 30223-2042	www.sctech.edu	2-year, Public	Less than one year certificate;One but less than two years certificate;Associate's degree;Two but less than 4 years certificate	Suburb: Large	No	4898	4898	15%	NA	Fall 2011	$8,381	-	139986	00562100
Data Modeling/Warehousing and Database Administration	Associates	Southwestern Illinois College	2500 Carlyle Ave, Belleville, Illinois 62221-5899	www.swic.edu	2-year, Public	Less than one year certificate;One but less than two years certificate;Associate's degree	Suburb: Large	No	10545	10545	25%	22%	Fall 2011	$9,178	-	143215	00163600
Data Modeling/Warehousing and Database Administration	Associates	University of Phoenix-Arizona	1625 West Fountainhead Parkway, Tempe, Arizona 85282	www.phoenix.edu	4-year, Private for-profit	Less than one year certificate;Associate's degree;Bachelor's degree;Postbaccalaureate certificate;Master's degree;Post-master's certificate;Doctor's degree - research/scholarship	City: Midsize	No	195059	155872	17%	NA	Fall 2008	$14,479	-	484613	02098800
Data Modeling/Warehousing and Database Administration	Associates	Wake Technical Community College	9101 Fayetteville Road, Raleigh, North Carolina 27603-5696	www.waketech.edu/	2-year, Public	Less than one year certificate;One but less than two years certificate;Associate's degree	Suburb: Large	No	21384	21384	14%	32%	Fall 2011	$9,129	-	199856	00484400
Data Modeling/Warehousing and Database Administration	Associates	Wayne County Community College District	801 W. Fort Street, Detroit, Michigan 48226	www.wcccd.edu	2-year, Public	Less than one year certificate;One but less than two years certificate;Associate's degree	City: Large	No	16310	16310	10%	23%	Fall 2011	$5,701	-	172635	00923000
Data Modeling/Warehousing and Database Administration	Associates	Wiregrass Georgia Technical College	4089 Val Tech Rd, Valdosta, Georgia 31602	www.wiregrass.edu	2-year, Public	Less than one year certificate;One but less than two years certificate;Associate's degree;Two but less than 4 years certificate	Suburb: Small	No	3629	3629	20%	NA	Fall 2011	$2,901	-	141255	00525600
		* Cohort Year represents the year for which students began their studies and applies to Graduation and Transfer Out Rates.
		** Net Price is Average Net Price for 2013-2014 generated for full-time beginning undergraduate students who were awarded grant or scholarship aid from federal, state or local governments, or the institution. For public institutions only students paying the in-state or in-district rate are included. For institutions that charge students by program, net price is generated for the institution’s lar…
		NA (Not applicable) - Graduation rate, transfer-out rate and the net price are not applicable to institutions that do not have full-time, first-time degree-seeking undergraduate students in the applicable cohort year or the financial aid year.
		National Center for Education Statistics
		College Navigator
		Generated at:9/4/2015 11:23:27 AM from URL:http://nces.ed.gov/collegenavigator/default.aspx?s=all&p=11.0802&l=94&xp=1
		Name	Address	Website	Type	Awards offered	Campus setting	Campus housing	Student population	Undergraduate students	Graduation Rate	Transfer-Out Rate	Cohort Year *	Net Price **	Largest Program	IPEDS ID	OPE ID
Data Modeling/Warehousing and Database Administration	Advanced	Appalachian State University	Dougherty Administration Building, Boone, North Carolina 28608	www.appstate.edu/	4-year, Public	Bachelor's degree;Postbaccalaureate certificate;Master's degree;Post-master's certificate;Doctor's degree - research/scholarship	Town: Distant	Yes	18026	16255	70%	12%	Fall 2008	$11,508	-	197869	00290600
Data Modeling/Warehousing and Database Administration	Advanced	Central Michigan University	106 Warriner Hall, Mount Pleasant, Michigan 48859	www.cmich.edu	4-year, Public	Bachelor's degree;Postbaccalaureate certificate;Master's degree;Post-master's certificate;Doctor's degree - research/scholarship;Doctor's degree - professional practice	Town: Distant	Yes	26879	20671	56%	NA	Fall 2008	$13,580	-	169248	00224300
Data Modeling/Warehousing and Database Administration	Advanced	DePaul University	1 E Jackson Blvd, Chicago, Illinois 60604	www.depaul.edu	4-year, Private not-for-profit	Less than one year certificate;One but less than two years certificate;Bachelor's degree;Master's degree;Post-master's certificate;Doctor's degree - research/scholarship;Doctor's degree - professional practice	City: Large	Yes	23799	16153	71%	NA	Fall 2008	$29,756	-	144740	00167100
Data Modeling/Warehousing and Database Administration	Advanced	EDP Univeristy of Puerto Rico Inc-San Juan	560 Ponce de Leon Ave. Cr. Arroyo St., San Juan, Puerto Rico 00919-2303	www.edpuniversity.edu	4-year, Private not-for-profit	One but less than two years certificate;Associate's degree;Bachelor's degree;Postbaccalaureate certificate;Master's degree	City: Large	No	1568	1466	25%	2%	Fall 2008	$7,825	-	243832	02165100
Data Modeling/Warehousing and Database Administration	Advanced	Ferris State University	1201 S State St, Big Rapids, Michigan 49307-2251	www.ferris.edu/	4-year, Public	Less than one year certificate;One but less than two years certificate;Associate's degree;Bachelor's degree;Postbaccalaureate certificate;Master's degree;Doctor's degree - research/scholarship;Doctor's degree - professional practice	Town: Distant	Yes	14600	13373	43%	31%	Fall 2008	$12,602	-	169910	00226000
Data Modeling/Warehousing and Database Administration	Advanced	George Mason University	4400 University Dr, Fairfax, Virginia 22030-4444	www.gmu.edu	4-year, Public	Bachelor's degree;Postbaccalaureate certificate;Master's degree;Post-master's certificate;Doctor's degree - research/scholarship;Doctor's degree - professional practice	Suburb: Large	Yes	33729	22349	67%	20%	Fall 2008	$17,347	-	232186	00374900
Data Modeling/Warehousing and Database Administration	Advanced	Inter American University of Puerto Rico-Metro	Highway #1 Km 16 3 Corner Francisco Sein St, San Juan, Puerto Rico 00919	www.metro.inter.edu/index.asp	4-year, Private not-for-profit	One but less than two years certificate;Associate's degree;Two but less than 4 years certificate;Bachelor's degree;Postbaccalaureate certificate;Master's degree;Post-master's certificate;Doctor's degree - research/scholarship	City: Large	No	9649	7016	32%	2%	Fall 2008	$8,102	-	242653	00393800
Data Modeling/Warehousing and Database Administration	Advanced	Lewis University	One University Parkway, Romeoville, Illinois 60446-2200	www.lewisu.edu	4-year, Private not-for-profit	One but less than two years certificate;Associate's degree;Bachelor's degree;Postbaccalaureate certificate;Master's degree;Post-master's certificate;Doctor's degree - research/scholarship;Doctor's degree - other	Suburb: Large	Yes	6689	4752	62%	NA	Fall 2008	$18,768	-	146612	00170700
Data Modeling/Warehousing and Database Administration	Advanced	Metropolitan State University	700 East Seventh Street, Saint Paul, Minnesota 55106-5000	www.metrostate.edu	4-year, Public	Less than one year certificate;One but less than two years certificate;Bachelor's degree;Postbaccalaureate certificate;Master's degree;Post-master's certificate;Doctor's degree - research/scholarship	City: Large	No	8355	7595	34%	37%	Fall 2008	$13,654	-	174020	01037400
Data Modeling/Warehousing and Database Administration	Advanced	Minnesota State University-Mankato	South Rd and Ellis Ave, Mankato, Minnesota 56001	www.mnsu.edu	4-year, Public	Less than one year certificate;One but less than two years certificate;Associate's degree;Bachelor's degree;Postbaccalaureate certificate;Master's degree;Post-master's certificate;Doctor's degree	City: Small	Yes	15387	13395	50%	34%	Fall 2008	$12,464	-	173920	00236000
Data Modeling/Warehousing and Database Administration	Advanced	Missouri University of Science and Technology	1870 Miner Circle, Rolla, Missouri 65409	www.mst.edu/	4-year, Public	One but less than two years certificate;Bachelor's degree;Postbaccalaureate certificate;Master's degree;Doctor's degree - research/scholarship	Town: Remote	Yes	8640	6520	63%	NA	Fall 2008	$14,377	-	178411	00251700
Data Modeling/Warehousing and Database Administration	Advanced	National University	11255 North Torrey Pines Road, La Jolla, California 92037-1011	www.nu.edu	4-year, Private not-for-profit	Less than one year certificate;Associate's degree;Bachelor's degree;Postbaccalaureate certificate;Master's degree;Doctor's degree - professional practice	City: Large	No	17608	9721	40%	NA	Fall 2008	$22,058	-	119605	01146000
Data Modeling/Warehousing and Database Administration	Advanced	North Carolina State University at Raleigh	2101 Hillsborough Street, Raleigh, North Carolina 27695-7001	www.ncsu.edu	4-year, Public	Associate's degree;Bachelor's degree;Postbaccalaureate certificate;Master's degree;Doctor's degree - research/scholarship;Doctor's degree - professional practice	City: Large	Yes	33989	24473	75%	9%	Fall 2008	$13,579	-	199193	00297200
Data Modeling/Warehousing and Database Administration	Advanced	Nova Southeastern University	3301 College Ave, Fort Lauderdale, Florida 33314-7796	www.nova.edu	4-year, Private not-for-profit	Less than one year certificate;One but less than two years certificate;Associate's degree;Bachelor's degree;Postbaccalaureate certificate;Master's degree;Post-master's certificate;Doctor's degree - research/scholarship;Doctor's degree - professional practice	Suburb: Large	Yes	24148	4699	46%	43%	Fall 2008	$24,833	-	136215	00150900
Data Modeling/Warehousing and Database Administration	Advanced	Rochester Institute of Technology	1 Lomb Memorial Dr, Rochester, New York 14623-5603	www.rit.edu/	4-year, Private not-for-profit	Less than one year certificate;One but less than two years certificate;Associate's degree;Bachelor's degree;Postbaccalaureate certificate;Master's degree;Doctor's degree - research/scholarship	Suburb: Large	Yes	16310	13460	63%	NA	Fall 2008	$27,923	-	195003	00280600
Data Modeling/Warehousing and Database Administration	Advanced	Towson University	8000 York Rd, Towson, Maryland 21252-0001	www.towson.edu	4-year, Public	Bachelor's degree;Postbaccalaureate certificate;Master's degree;Post-master's certificate;Doctor's degree - research/scholarship;Doctor's degree - professional practice	City: Small	Yes	22285	18807	68%	22%	Fall 2008	$13,859	-	164076	00209900
Data Modeling/Warehousing and Database Administration	Advanced	University of Louisville	2301 S 3rd St, Louisville, Kentucky 40292-0001	www.louisville.edu	4-year, Public	Less than one year certificate;Associate's degree;Bachelor's degree;Postbaccalaureate certificate;Master's degree;Post-master's certificate;Doctor's degree - research/scholarship;Doctor's degree - professional practice	Suburb: Large	Yes	21561	15961	54%	NA	Fall 2008	$14,635	-	157289	00199900
Data Modeling/Warehousing and Database Administration	Advanced	University of Nebraska at Omaha	6001 Dodge St, Omaha, Nebraska 68182-0225	www.unomaha.edu	4-year, Public	Bachelor's degree;Postbaccalaureate certificate;Master's degree;Post-master's certificate;Doctor's degree - research/scholarship	City: Large	Yes	15227	12221	45%	31%	Fall 2008	$10,979	-	181394	00255400
Data Modeling/Warehousing and Database Administration	Advanced	University of Southern California	University Park, Los Angeles, California 90089	www.usc.edu/	4-year, Private not-for-profit	Bachelor's degree;Postbaccalaureate certificate;Master's degree;Post-master's certificate;Doctor's degree - research/scholarship;Doctor's degree - professional practice;Doctor's degree - other	City: Large	Yes	42453	18739	91%	NA	Fall 2008	$31,189	-	123961	00132800
Data Modeling/Warehousing and Database Administration	Advanced	University of St Thomas	2115 Summit Ave, Saint Paul, Minnesota 55105-1078	www.stthomas.edu	4-year, Private not-for-profit	Two but less than 4 years certificate;Bachelor's degree;Postbaccalaureate certificate;Master's degree;Post-master's certificate;Doctor's degree - research/scholarship;Doctor's degree - professional practice	City: Large	Yes	10140	6148	72%	21%	Fall 2008	$30,606	-	174914	00234500
Data Modeling/Warehousing and Database Administration	Advanced	University of Utah	201 Presidents Circle, ROOM 201, Salt Lake City, Utah 84112-9008	www.utah.edu	4-year, Public	Bachelor's degree;Postbaccalaureate certificate;Master's degree;Post-master's certificate;Doctor's degree - research/scholarship;Doctor's degree - professional practice	City: Midsize	Yes	31515	23907	62%	NA	Fall 2008	$11,277	-	230764	00367500
		* Cohort Year represents the year for which students began their studies and applies to Graduation and Transfer Out Rates.
		** Net Price is Average Net Price for 2013-2014 generated for full-time beginning undergraduate students who were awarded grant or scholarship aid from federal, state or local governments, or the institution. For public institutions only students paying the in-state or in-district rate are included. For institutions that charge students by program, net price is generated for the institution’s lar…
		NA (Not applicable) - Graduation rate, transfer-out rate and the net price are not applicable to institutions that do not have full-time, first-time degree-seeking undergraduate students in the applicable cohort year or the financial aid year.
		National Center for Education Statistics
		College Navigator
		Generated at:9/4/2015 11:24:41 AM from URL:http://nces.ed.gov/collegenavigator/default.aspx?s=all&p=11.0802&l=91&xp=1
		Name	Address	Website	Type	Awards offered	Campus setting	Campus housing	Student population	Undergraduate students	Graduation Rate	Transfer-Out Rate	Cohort Year *	Net Price **	Largest Program	IPEDS ID	OPE ID
Data Modeling/Warehousing and Database Administration	Certificate	American Public University System	111 W Congress St, Charles Town, West Virginia 25414	www.apus.edu	4-year, Private for-profit	Less than one year certificate;Associate's degree;Bachelor's degree;Postbaccalaureate certificate;Master's degree	Town: Fringe	No	57539	46997	46%	NA	Fall 2008	$9,572	-	449339	03819300
Data Modeling/Warehousing and Database Administration	Certificate	American River College	4700 College Oak Dr, Sacramento, California 95841-4286	www.arc.losrios.edu/	2-year, Public	Less than one year certificate;One but less than two years certificate;Associate's degree;Two but less than 4 years certificate	Suburb: Large	No	29133	29133	27%	8%	Fall 2011	$7,838	-	109208	00123200
Data Modeling/Warehousing and Database Administration	Certificate	Atlanta Technical College	1560 Metropolitan Pkwy SW, Atlanta, Georgia 30310-4446	www.atlantatech.edu/	2-year, Public	Less than one year certificate;One but less than two years certificate;Associate's degree;Two but less than 4 years certificate	City: Large	No	4282	4282	28%	NA	Fall 2011	$3,530	-	138840	00854300
Data Modeling/Warehousing and Database Administration	Certificate	Bellevue College	3000 Landerholm Cir SE, Bellevue, Washington 98007-6484	bellevuecollege.edu/	4-year, primarily associate's, Public	Less than one year certificate;One but less than two years certificate;Associate's degree;Bachelor's degree	City: Midsize	No	13469	13469	26%	18%	Fall 2008	$7,425	-	234669	00376900
Data Modeling/Warehousing and Database Administration	Certificate	Bunker Hill Community College	250 New Rutherford Ave, Boston, Massachusetts 02129-2925	www.bhcc.mass.edu	2-year, Public	Less than one year certificate;One but less than two years certificate;Associate's degree	City: Large	No	14253	14253	11%	18%	Fall 2011	$7,361	-	165112	01121000
Data Modeling/Warehousing and Database Administration	Certificate	Cascadia College	18345 Campus Way NE, Bothell, Washington 98011-8205	www.cascadia.edu	2-year, Public	Less than one year certificate;One but less than two years certificate;Associate's degree	Suburb: Large	No	2759	2759	29%	28%	Fall 2011	$9,544	-	439190	03483500
Data Modeling/Warehousing and Database Administration	Certificate	Central Piedmont Community College	1201 Elizabeth Avenue, Charlotte, North Carolina 28204	www.cpcc.edu	2-year, Public	Less than one year certificate;One but less than two years certificate;Associate's degree	City: Large	No	19957	19957	11%	31%	Fall 2011	$8,268	-	198260	00291500
Data Modeling/Warehousing and Database Administration	Certificate	Chandler-Gilbert Community College	2626 E Pecos Rd, Chandler, Arizona 85225-2499	www.cgc.maricopa.edu	2-year, Public	Less than one year certificate;One but less than two years certificate;Associate's degree;Two but less than 4 years certificate	Suburb: Large	Yes	14500	14500	20%	36%	Fall 2011	$8,258	-	364025	03072200
Data Modeling/Warehousing and Database Administration	Certificate	Chattahoochee Technical College	980 S Cobb Drive Dr SE, Marietta, Georgia 30060	www.chattahoocheetech.edu	2-year, Public	Less than one year certificate;One but less than two years certificate;Associate's degree;Two but less than 4 years certificate	Suburb: Large	No	9942	9942	6%	NA	Fall 2011	$2,904	-	140331	00562000
Data Modeling/Warehousing and Database Administration	Certificate	College of Southern Nevada	6375 W. Charleston Blvd., Las Vegas, Nevada 89146-1164	www.csn.edu	4-year, primarily associate's, Public	Less than one year certificate;One but less than two years certificate;Associate's degree;Bachelor's degree	City: Large	No	35943	35943	9%	15%	Fall 2008	$7,618	-	182005	01036200
Data Modeling/Warehousing and Database Administration	Certificate	Cosumnes River College	8401 Center Parkway, Sacramento, California 95823-5799	www.crc.losrios.edu/	2-year, Public	Less than one year certificate;One but less than two years certificate;Associate's degree;Two but less than 4 years certificate	City: Large	No	14467	14467	26%	8%	Fall 2011	$9,231	-	113096	00753600
Data Modeling/Warehousing and Database Administration	Certificate	De Anza College	21250 Stevens Creek Blvd., Cupertino, California 95014	www.deanza.edu/	2-year, Public	Less than one year certificate;One but less than two years certificate;Associate's degree;Two but less than 4 years certificate	City: Small	No	23104	23104	59%	8%	Fall 2011	$5,615	-	113333	00448000
Data Modeling/Warehousing and Database Administration	Certificate	Edmonds Community College	20000 68th Ave W, Lynnwood, Washington 98036-5912	www.edcc.edu	2-year, Public	Less than one year certificate;One but less than two years certificate;Associate's degree	Suburb: Large	Yes	8993	8993	28%	22%	Fall 2011	$7,981	-	235103	00500100
Data Modeling/Warehousing and Database Administration	Certificate	Folsom Lake College	10 College Parkway, Folsom, California 95630	www.flc.losrios.edu/	2-year, Public	Less than one year certificate;One but less than two years certificate;Associate's degree	City: Small	No	7942	7942	31%	8%	Fall 2011	$10,660	-	444219	03871300
Data Modeling/Warehousing and Database Administration	Certificate	Foothill College	12345 El Monte Rd, Los Altos Hills, California 94022	www.foothill.edu	2-year, Public	Less than one year certificate;One but less than two years certificate;Associate's degree;Two but less than 4 years certificate	Suburb: Large	No	15030	15030	56%	13%	Fall 2011	$6,590	-	114716	00119900
Data Modeling/Warehousing and Database Administration	Certificate	Forsyth Technical Community College	2100 Silas Creek Pky, Winston Salem, North Carolina 27103-5197	www.forsythtech.edu/	2-year, Public	Less than one year certificate;One but less than two years certificate;Associate's degree	City: Midsize	No	9148	9148	11%	17%	Fall 2011	$4,549	-	198552	00531700
Data Modeling/Warehousing and Database Administration	Certificate	Francis Tuttle Technology Center	12777 N Rockwell Ave, Oklahoma City, Oklahoma 73142-2789	www.francistuttle.edu	< 2-year, Public	Less than one year certificate;One but less than two years certificate	City: Large	No	2201	2201	39%	NA	2011-12	$9,296	Nursing Assistant/Aide and Patient Care Assistant/Aide	245999	02222700
Data Modeling/Warehousing and Database Administration	Certificate	Georgia Piedmont Technical College	495 N Indian Creek Dr, Clarkston, Georgia 30021-2397	www.gptc.edu	2-year, Public	Less than one year certificate;One but less than two years certificate;Associate's degree;Two but less than 4 years certificate	Suburb: Large	No	4050	4050	32%	NA	Fall 2011	$9,137	-	244446	00562200
Data Modeling/Warehousing and Database Administration	Certificate	Glen Oaks Community College	62249 Shimmel Rd, Centreville, Michigan 49032-9719	www.glenoaks.cc.mi.us/Pages/default.aspx	2-year, Public	Less than one year certificate;One but less than two years certificate;Associate's degree	Rural: Distant	No	1104	1104	26%	29%	Fall 2011	$6,469	-	169974	00226300
Data Modeling/Warehousing and Database Administration	Certificate	Hennepin Technical College	9000 Brooklyn Blvd, Brooklyn Park, Minnesota 55445	www.hennepintech.edu	2-year, Public	Less than one year certificate;One but less than two years certificate;Associate's degree;Two but less than 4 years certificate	Suburb: Large	No	5985	5985	25%	12%	Fall 2011	$13,687	-	173708	01049100
Data Modeling/Warehousing and Database Administration	Certificate	Ivy Tech Community College	50 W. Fall Creek Parkway N. Drive, Indianapolis, Indiana 46208-5752	www.ivytech.edu	2-year, Public	Less than one year certificate;One but less than two years certificate;Associate's degree	City: Large	No	91179	91179	8%	17%	Fall 2011	$6,729	-	150987	00991700
Data Modeling/Warehousing and Database Administration	Certificate	Johnson County Community College	12345 College Blvd, Overland Park, Kansas 66210-1299	www.jccc.edu	2-year, Public	Less than one year certificate;One but less than two years certificate;Associate's degree	City: Midsize	No	19429	19429	15%	27%	Fall 2011	$7,091	-	155210	00824400
Data Modeling/Warehousing and Database Administration	Certificate	Kalamazoo Valley Community College	6767 West O Ave, Kalamazoo, Michigan 49003-4070	www.kvcc.edu	2-year, Public	Less than one year certificate;One but less than two years certificate;Associate's degree;Two but less than 4 years certificate	Suburb: Midsize	No	9489	9489	10%	28%	Fall 2011	$3,986	-	170541	00694900
Data Modeling/Warehousing and Database Administration	Certificate	Kapiolani Community College	4303 Diamond Head Rd, Honolulu, Hawaii 96816-4421	kapiolani.hawaii.edu/	2-year, Public	One but less than two years certificate;Associate's degree;Two but less than 4 years certificate	City: Large	No	7994	7994	20%	17%	Fall 2011	$4,474	-	141796	00161300
Data Modeling/Warehousing and Database Administration	Certificate	Lakeland Community College	7700 Clocktower Drive, Kirtland, Ohio 44094-5198	www.lakelandcc.edu	2-year, Public	Less than one year certificate;One but less than two years certificate;Associate's degree	Suburb: Large	No	8250	8250	13%	37%	Fall 2011	$8,086	-	203599	00680400
Data Modeling/Warehousing and Database Administration	Certificate	Lansing Community College	419 N Capitol Ave, Lansing, Michigan 48901-7210	www.lcc.edu	2-year, Public	Less than one year certificate;One but less than two years certificate;Associate's degree;Two but less than 4 years certificate	City: Midsize	No	16031	16031	11%	26%	Fall 2011	$5,476	-	170657	00227800
Data Modeling/Warehousing and Database Administration	Certificate	Los Angeles City College	855 N Vermont Ave, Los Angeles, California 90029	www.lacitycollege.edu/	2-year, Public	Less than one year certificate;One but less than two years certificate;Associate's degree;Two but less than 4 years certificate	City: Large	No	18756	18756	17%	8%	Fall 2011	$6,752	-	117788	00122300
Data Modeling/Warehousing and Database Administration	Certificate	Minneapolis Community and Technical College	1501 Hennepin Ave, Minneapolis, Minnesota 55403-1779	www.minneapolis.edu	2-year, Public	Less than one year certificate;One but less than two years certificate;Associate's degree;Two but less than 4 years certificate	City: Large	No	9237	9237	14%	21%	Fall 2011	$13,892	-	174136	00236200
Data Modeling/Warehousing and Database Administration	Certificate	Minnesota State University-Mankato	South Rd and Ellis Ave, Mankato, Minnesota 56001	www.mnsu.edu	4-year, Public	Less than one year certificate;One but less than two years certificate;Associate's degree;Bachelor's degree;Postbaccalaureate certificate;Master's degree;Post-master's certificate;Doctor's degree	City: Small	Yes	15387	13395	50%	34%	Fall 2008	$12,464	-	173920	00236000
Data Modeling/Warehousing and Database Administration	Certificate	Mississippi Gulf Coast Community College	51 Main Street, Perkinston, Mississippi 39573	https://www.mgccc.edu	2-year, Public	Less than one year certificate;One but less than two years certificate;Associate's degree	Rural: Distant	Yes	9799	9799	26%	17%	Fall 2011	$8,028	-	176071	00241700
Data Modeling/Warehousing and Database Administration	Certificate	Moore Norman Technology Center	4701 12th Avenue NW, Norman, Oklahoma 73069-8399	mntechnology.com/welcome	2-year, Public	Less than one year certificate;One but less than two years certificate;Two but less than 4 years certificate	Rural: Fringe	No	1036	1036	45%	NA	Fall 2011	$3,966	Automobile/Automotive Mechanics Technology/Technician	248606	01227200
Data Modeling/Warehousing and Database Administration	Certificate	Moraine Valley Community College	9000 W. College Parkway, Palos Hills, Illinois 60465-0937	www.morainevalley.edu	2-year, Public	Less than one year certificate;One but less than two years certificate;Associate's degree	Suburb: Large	No	15286	15286	21%	27%	Fall 2011	$4,848	-	147378	00769200
Data Modeling/Warehousing and Database Administration	Certificate	Mt Hood Community College	26000 SE Stark St, Gresham, Oregon 97030	www.mhcc.edu	2-year, Public	Less than one year certificate;One but less than two years certificate;Associate's degree;Two but less than 4 years certificate	Suburb: Large	No	9276	9276	23%	30%	Fall 2011	$9,674	-	209250	00320400
Data Modeling/Warehousing and Database Administration	Certificate	Mt San Jacinto Community College District	1499 N. State St., San Jacinto, California 92583-2399	www.msjc.edu	2-year, Public	Less than one year certificate;One but less than two years certificate;Associate's degree	Suburb: Midsize	No	14580	14580	24%	16%	Fall 2011	$6,923	-	119216	00124600
Data Modeling/Warehousing and Database Administration	Certificate	Oakland Community College	2480 Opdyke Rd, Bloomfield Hills, Michigan 48304-2266	https://www.oaklandcc.edu	2-year, Public	Less than one year certificate;One but less than two years certificate;Associate's degree	Suburb: Large	No	24031	24031	8%	41%	Fall 2011	$3,728	-	171535	00230300
Data Modeling/Warehousing and Database Administration	Certificate	Oakton Community College	1600 E Golf Rd., Des Plaines, Illinois 60016-1268	www.oakton.edu	2-year, Public	Less than one year certificate;One but less than two years certificate;Associate's degree	City: Small	No	10589	10589	17%	37%	Fall 2011	$6,030	-	147800	00989600
Data Modeling/Warehousing and Database Administration	Certificate	Ohlone College	43600 Mission Blvd, Fremont, California 94539-0390	www.ohlone.edu	2-year, Public	Less than one year certificate;One but less than two years certificate;Associate's degree	Suburb: Large	No	11318	11318	39%	17%	Fall 2011	$12,083	-	120290	00448100
Data Modeling/Warehousing and Database Administration	Certificate	Pittsburgh Technical Institute	1111 McKee Road, Oakdale, Pennsylvania 15071	www.pti.edu	2-year, Private for-profit	Less than one year certificate;One but less than two years certificate;Associate's degree	Rural: Fringe	Yes	2045	2045	54%	NA	Fall 2011	$19,371	-	215415	00743700
Data Modeling/Warehousing and Database Administration	Certificate	Quinsigamond Community College	670 West Boylston Street, Worcester, Massachusetts 01606-2092	www.qcc.edu	2-year, Public	Less than one year certificate;One but less than two years certificate;Associate's degree	City: Midsize	No	8452	8452	16%	16%	Fall 2011	$6,698	-	167534	00217500
Data Modeling/Warehousing and Database Administration	Certificate	Red Rocks Community College	13300 W Sixth Ave, Lakewood, Colorado 80228-1255	www.rrcc.edu	2-year, Public	Less than one year certificate;One but less than two years certificate;Associate's degree;Two but less than 4 years certificate	City: Midsize	No	8112	8112	26%	36%	Fall 2011	$7,930	-	127909	00954300
Data Modeling/Warehousing and Database Administration	Certificate	Riverside City College	4800 Magnolia Avenue, Riverside, California 92506	www.rcc.edu/riverside/	2-year, Public	Less than one year certificate;One but less than two years certificate;Associate's degree	City: Large	No	18547	18547	29%	17%	Fall 2011	$7,375	-	121901	00127000
Data Modeling/Warehousing and Database Administration	Certificate	Santa Ana College	1530 W. 17th Street, Santa Ana, California 92706-3398	www.sac.edu	2-year, Public	Less than one year certificate;One but less than two years certificate;Associate's degree	City: Large	No	29590	29590	25%	7%	Fall 2011	$6,024	-	121619	00128400
Data Modeling/Warehousing and Database Administration	Certificate	Santa Monica College	1900 Pico Blvd, Santa Monica, California 90405-1628	www.smc.edu	2-year, Public	Less than one year certificate;One but less than two years certificate;Associate's degree	City: Small	No	30158	30158	30%	14%	Fall 2011	$7,435	-	122977	00128600
Data Modeling/Warehousing and Database Administration	Certificate	Scottsdale Community College	9000 E Chaparral Rd, Scottsdale, Arizona 85256	www.scottsdalecc.edu	2-year, Public	Less than one year certificate;One but less than two years certificate;Associate's degree	Rural: Fringe	No	9863	9863	16%	42%	Fall 2011	$8,456	-	105747	00830400
Data Modeling/Warehousing and Database Administration	Certificate	Seattle Central College	1701 Broadway Avenue, Seattle, Washington 98122	www.seattlecentral.edu	4-year, primarily associate's, Public	Less than one year certificate;One but less than two years certificate;Associate's degree;Two but less than 4 years certificate;Bachelor's degree	City: Large	No	6773	6773	25%	31%	Fall 2008	$4,953	-	236513	00378700
Data Modeling/Warehousing and Database Administration	Certificate	Sinclair Community College	444 W. Third St., Dayton, Ohio 45402-1460	www.sinclair.edu	2-year, Public	Less than one year certificate;One but less than two years certificate;Associate's degree	City: Midsize	No	19093	19093	12%	28%	Fall 2011	$4,382	-	205470	00311900
Data Modeling/Warehousing and Database Administration	Certificate	Southern Crescent Technical College	501 Varsity Rd, Griffin, Georgia 30223-2042	www.sctech.edu	2-year, Public	Less than one year certificate;One but less than two years certificate;Associate's degree;Two but less than 4 years certificate	Suburb: Large	No	4898	4898	15%	NA	Fall 2011	$8,381	-	139986	00562100
Data Modeling/Warehousing and Database Administration	Certificate	University of Akron Main Campus	302 Buchtel Common, Akron, Ohio 44325-4702	www.uakron.edu	4-year, Public	Less than one year certificate;One but less than two years certificate;Associate's degree;Bachelor's degree;Postbaccalaureate certificate;Master's degree;Post-master's certificate;Doctor's degree - research/scholarship;Doctor's degree - professional practice	City: Midsize	Yes	23962	19710	42%	26%	Fall 2008	$16,111	-	200800	00312300
Data Modeling/Warehousing and Database Administration	Certificate	University of Cincinnati-Main Campus	2624 Clifton Avenue, Cincinnati, Ohio 45221-0063	www.uc.edu	4-year, Public	Less than one year certificate;One but less than two years certificate;Associate's degree;Two but less than 4 years certificate;Bachelor's degree;Postbaccalaureate certificate;Master's degree;Post-master's certificate;Doctor's degree - research/scholarship;Doctor's degree - professional practice	City: Large	Yes	35313	24300	60%	23%	Fall 2008	$19,739	-	201885	00312500
Data Modeling/Warehousing and Database Administration	Certificate	University of Maryland-University College	3501 University Blvd East, Adelphi, Maryland 20783-8010	www.umuc.edu	4-year, Public	Associate's degree;Two but less than 4 years certificate;Bachelor's degree;Postbaccalaureate certificate;Master's degree;Doctor's degree - professional practice	Suburb: Large	No	47906	35154	8%	23%	Fall 2008	$10,588	-	163204	01164400
Data Modeling/Warehousing and Database Administration	Certificate	University of Rio Grande	218 N College Ave, Rio Grande, Ohio 45674	www.rio.edu	4-year, primarily associate's, Private not-for-profit	Less than one year certificate;One but less than two years certificate;Associate's degree;Bachelor's degree;Master's degree	Rural: Distant	Yes	2202	2147	39%	32%	Fall 2008	$26,798	-	205203	00311600
Data Modeling/Warehousing and Database Administration	Certificate	Wake Technical Community College	9101 Fayetteville Road, Raleigh, North Carolina 27603-5696	www.waketech.edu/	2-year, Public	Less than one year certificate;One but less than two years certificate;Associate's degree	Suburb: Large	No	21384	21384	14%	32%	Fall 2011	$9,129	-	199856	00484400
Data Modeling/Warehousing and Database Administration	Certificate	William Rainey Harper College	1200 W Algonquin Rd, Palatine, Illinois 60067-7398	www.harpercollege.edu	2-year, Public	Less than one year certificate;One but less than two years certificate;Associate's degree	Suburb: Large	No	14957	14957	21%	29%	Fall 2011	$7,161	-	149842	00396100
Data Modeling/Warehousing and Database Administration	Certificate	Wiregrass Georgia Technical College	4089 Val Tech Rd, Valdosta, Georgia 31602	www.wiregrass.edu	2-year, Public	Less than one year certificate;One but less than two years certificate;Associate's degree;Two but less than 4 years certificate	Suburb: Small	No	3629	3629	20%	NA	Fall 2011	$2,901	-	141255	00525600
		* Cohort Year represents the year for which students began their studies and applies to Graduation and Transfer Out Rates.
		** Net Price is Average Net Price for 2013-2014 generated for full-time beginning undergraduate students who were awarded grant or scholarship aid from federal, state or local governments, or the institution. For public institutions only students paying the in-state or in-district rate are included. For institutions that charge students by program, net price is generated for the institution’s lar…
		NA (Not applicable) - Graduation rate, transfer-out rate and the net price are not applicable to institutions that do not have full-time, first-time degree-seeking undergraduate students in the applicable cohort year or the financial aid year.
		National Center for Education Statistics
		College Navigator
		Generated at:9/4/2015 11:29:11 AM from URL:http://nces.ed.gov/collegenavigator/default.aspx?s=all&p=11.0401&l=91&xp=1
		Name	Address	Website	Type	Awards offered	Campus setting	Campus housing	Student population	Undergraduate students	Graduation Rate	Transfer-Out Rate	Cohort Year *	Net Price **	Largest Program	IPEDS ID	OPE ID
Information Science/Studies	Certificate	Ace Computer Training Center	109-19 72nd Road, STE # 4F, Forest Hills, New York 11375	www.acecareer.edu	< 2-year, Private for-profit	One but less than two years certificate	City: Large	No	162	162	NA	NA	2011-12	NA	Information Science/Studies	449676	04043300
Information Science/Studies	Certificate	Alamance Community College	1247 Jimmie Kerr Road, Graham, North Carolina 27253-8000	www.alamancecc.edu	2-year, Public	Less than one year certificate;One but less than two years certificate;Associate's degree	Rural: Fringe	No	4437	4437	11%	18%	Fall 2011	$9,477	-	199786	00546300
Information Science/Studies	Certificate	Arkansas State University-Mountain Home	1600 South College Street, Mountain Home, Arkansas 72653	www.asumh.edu	2-year, Public	Less than one year certificate;One but less than two years certificate;Associate's degree	Town: Remote	No	1393	1393	24%	20%	Fall 2011	$4,902	-	420538	00109003
Information Science/Studies	Certificate	Armstrong State University	11935 Abercorn St, Savannah, Georgia 31419-1997	www.armstrong.edu	4-year, Public	Less than one year certificate;One but less than two years certificate;Associate's degree;Bachelor's degree;Postbaccalaureate certificate;Master's degree;Post-master's certificate;Doctor's degree - professional practice	City: Midsize	Yes	7094	6346	30%	22%	Fall 2008	$14,013	-	138789	00154600
Information Science/Studies	Certificate	Asheville-Buncombe Technical Community College	340 Victoria Rd, Asheville, North Carolina 28801-4897	www.abtech.edu	2-year, Public	Less than one year certificate;One but less than two years certificate;Associate's degree	City: Small	No	7507	7507	28%	16%	Fall 2011	$8,839	-	197887	00403300
Information Science/Studies	Certificate	Augsburg College	2211 Riverside Ave, Minneapolis, Minnesota 55454	www.augsburg.edu	4-year, Private not-for-profit	One but less than two years certificate;Bachelor's degree;Master's degree;Post-master's certificate;Doctor's degree - professional practice	City: Large	Yes	3548	2619	63%	NA	Fall 2008	$18,460	-	173045	00233400
Information Science/Studies	Certificate	AVTEC-Alaska's Institute of Technology	809 Second Avenue, Seward, Alaska 99664-0889	www.avtec.edu/	2-year, Public	Less than one year certificate;One but less than two years certificate;Associate's degree	Rural: Remote	Yes	889	889	77%	6%	Fall 2011	$2,412	Nursing Assistant/Aide and Patient Care Assistant/Aide	102711	03160300
Information Science/Studies	Certificate	Blue Ridge Community and Technical College	13650 Apple Harvest Drive, Martinsburg, West Virginia 25403	www.blueridgectc.edu	2-year, Public	One but less than two years certificate;Associate's degree	Rural: Fringe	No	5528	5528	9%	8%	Fall 2011	$7,579	-	446774	03957300
Information Science/Studies	Certificate	Blue Ridge Community College	180 West Campus Drive, Flat Rock, North Carolina 28731-4728	www.blueridge.edu	2-year, Public	Less than one year certificate;One but less than two years certificate;Associate's degree	Suburb: Large	No	2215	2215	24%	19%	Fall 2011	$8,624	-	198039	00968400
Information Science/Studies	Certificate	Bossier Parish Community College	6220 East Texas, Bossier City, Louisiana 71111-6922	www.bpcc.edu	2-year, Public	Less than one year certificate;One but less than two years certificate;Associate's degree	City: Small	No	8693	8693	11%	41%	Fall 2011	$8,220	-	158431	02055400
Information Science/Studies	Certificate	Caldwell Community College and Technical Institute	2855 Hickory Blvd., Hudson, North Carolina 28638	www.cccti.edu	2-year, Public	Less than one year certificate;One but less than two years certificate;Associate's degree	Suburb: Midsize	No	3876	3876	12%	17%	Fall 2011	$11,646	-	198118	00483500
Information Science/Studies	Certificate	Carteret Community College	3505 Arendell St, Morehead City, North Carolina 28557-2989	www.carteret.edu	2-year, Public	Less than one year certificate;One but less than two years certificate;Associate's degree	Town: Distant	No	1659	1659	19%	26%	Fall 2011	$10,468	-	198206	00808100
Information Science/Studies	Certificate	Catawba Valley Community College	2550 Hwy 70 SE, Hickory, North Carolina 28602-0699	www.cvcc.edu	2-year, Public	Less than one year certificate;One but less than two years certificate;Associate's degree	City: Small	No	4742	4742	14%	24%	Fall 2011	$12,353	-	198233	00531800
Information Science/Studies	Certificate	Central Piedmont Community College	1201 Elizabeth Avenue, Charlotte, North Carolina 28204	www.cpcc.edu	2-year, Public	Less than one year certificate;One but less than two years certificate;Associate's degree	City: Large	No	19957	19957	11%	31%	Fall 2011	$8,268	-	198260	00291500
Information Science/Studies	Certificate	City Colleges of Chicago-Harold Washington College	30 E Lake St, Chicago, Illinois 60601-2449	www.ccc.edu/colleges/washington/Pages/default.aspx	2-year, Public	Less than one year certificate;One but less than two years certificate;Associate's degree	City: Large	No	9392	9392	11%	30%	Fall 2011	$6,073	-	144209	00165200
Information Science/Studies	Certificate	City Colleges of Chicago-Harry S Truman College	1145 W Wilson Ave., Chicago, Illinois 60640-6063	ccc.edu/colleges/truman/pages/default.aspx	2-year, Public	Less than one year certificate;One but less than two years certificate;Associate's degree	City: Large	No	10601	10601	14%	30%	Fall 2011	$8,577	-	144184	00164800
Information Science/Studies	Certificate	City Colleges of Chicago-Kennedy-King College	6301 S Halsted St, Chicago, Illinois 60621-2709	www.ccc.edu/colleges/kennedy/pages/default.aspx	2-year, Public	Less than one year certificate;One but less than two years certificate;Associate's degree	City: Large	No	5313	5313	23%	20%	Fall 2011	$9,717	-	144157	00165400
Information Science/Studies	Certificate	City Colleges of Chicago-Malcolm X College	1900 W Van Buren, Chicago, Illinois 60612-3197	www.ccc.edu/colleges/malcolm-x/pages/default.aspx	2-year, Public	Less than one year certificate;One but less than two years certificate;Associate's degree	City: Large	No	6245	6245	11%	26%	Fall 2011	$8,128	-	144166	00165000
Information Science/Studies	Certificate	City Colleges of Chicago-Olive-Harvey College	10001 S Woodlawn Ave, Chicago, Illinois 60628-1696	ccc.edu/colleges/olive-harvey/pages/default.aspx	2-year, Public	Less than one year certificate;One but less than two years certificate;Associate's degree	City: Large	No	4572	4572	9%	30%	Fall 2011	$7,913	-	144175	00976700
Information Science/Studies	Certificate	City Colleges of Chicago-Richard J Daley College	7500 S Pulaski Rd, Chicago, Illinois 60652-1299	ccc.edu/colleges/daley/pages/default.aspx	2-year, Public	Less than one year certificate;One but less than two years certificate;Associate's degree	City: Large	No	8914	8914	13%	23%	Fall 2011	$6,065	-	144193	00164900
Information Science/Studies	Certificate	City Colleges of Chicago-Wilbur Wright College	4300 N Narragansett, Chicago, Illinois 60634-1500	ccc.edu/colleges/wright/pages/default.aspx	2-year, Public	Less than one year certificate;One but less than two years certificate;Associate's degree	City: Large	No	12146	12146	15%	21%	Fall 2011	$6,083	-	144218	00165500
Information Science/Studies	Certificate	Cleveland Community College	137 S Post Rd, Shelby, North Carolina 28152-6224	www.clevelandcc.edu	2-year, Public	Less than one year certificate;One but less than two years certificate;Associate's degree	Town: Fringe	No	2990	2990	19%	26%	Fall 2011	$503	-	198321	00808200
Information Science/Studies	Certificate	College of Southern Maryland	8730 Mitchell Rd, La Plata, Maryland 20646-0910	www.csmd.edu/	2-year, Public	One but less than two years certificate;Associate's degree	Rural: Fringe	No	8411	8411	13%	23%	Fall 2011	$8,029	-	162122	00206400
Information Science/Studies	Certificate	College of the Albemarle	1208 N Road St, Elizabeth City, North Carolina 27906-2327	www.albemarle.edu	2-year, Public	Less than one year certificate;One but less than two years certificate;Associate's degree	Town: Distant	No	2408	2408	18%	23%	Fall 2011	$7,277	-	197814	00291700
Information Science/Studies	Certificate	Columbia-Greene Community College	4400 Route 23, Hudson, New York 12534	www.sunycgcc.edu	2-year, Public	One but less than two years certificate;Associate's degree	Rural: Fringe	No	2047	2047	31%	13%	Fall 2011	$5,711	-	190169	00678900
Information Science/Studies	Certificate	Davidson County Community College	297 Davidson Community College Rd, Thomasville, North Carolina 27360-7385	www.davidsonccc.edu	2-year, Public	Less than one year certificate;One but less than two years certificate;Associate's degree	Rural: Fringe	No	4102	4102	23%	25%	Fall 2011	$8,081	-	198376	00291900
Information Science/Studies	Certificate	Drexel University	3141 Chestnut St, Philadelphia, Pennsylvania 19104	www.drexel.edu	4-year, Private not-for-profit	Less than one year certificate;One but less than two years certificate;Associate's degree;Bachelor's degree;Postbaccalaureate certificate;Master's degree;Post-master's certificate;Doctor's degree - research/scholarship;Doctor's degree - professional practice;Doctor's degree - other	City: Large	Yes	26359	16896	67%	24%	Fall 2008	$37,244	-	212054	00325600
Information Science/Studies	Certificate	Durham Technical Community College	1637 Lawson Street, Durham, North Carolina 27703-5023	www.durhamtech.edu	2-year, Public	Less than one year certificate;One but less than two years certificate;Associate's degree	City: Midsize	No	5035	5035	12%	21%	Fall 2011	$5,652	-	198455	00544800
Information Science/Studies	Certificate	Dyersburg State Community College	1510 Lake Rd, Dyersburg, Tennessee 38024-2411	www.dscc.edu	2-year, Public	Less than one year certificate;One but less than two years certificate;Associate's degree	Town: Distant	No	2847	2847	13%	30%	Fall 2011	$6,155	-	220057	00683500
Information Science/Studies	Certificate	Farmingdale State College	2350 Broadhollow Road, Farmingdale, New York 11735-1021	www.farmingdale.edu/	4-year, Public	One but less than two years certificate;Associate's degree;Bachelor's degree	Suburb: Large	Yes	8394	8394	45%	34%	Fall 2008	$8,146	-	196042	00285800
Information Science/Studies	Certificate	Fayetteville Technical Community College	2201 Hull Rd, Fayetteville, North Carolina 28303-0236	www.faytechcc.edu	2-year, Public	Less than one year certificate;One but less than two years certificate;Associate's degree;Two but less than 4 years certificate	City: Midsize	No	12103	12103	6%	11%	Fall 2011	$3,863	-	198534	00764000
Information Science/Studies	Certificate	Forsyth Technical Community College	2100 Silas Creek Pky, Winston Salem, North Carolina 27103-5197	www.forsythtech.edu/	2-year, Public	Less than one year certificate;One but less than two years certificate;Associate's degree	City: Midsize	No	9148	9148	11%	17%	Fall 2011	$4,549	-	198552	00531700
Information Science/Studies	Certificate	Gaston College	201 Hwy 321 S, Dallas, North Carolina 28034	www.gaston.edu	2-year, Public	Less than one year certificate;One but less than two years certificate;Associate's degree	Suburb: Midsize	No	5777	5777	21%	18%	Fall 2011	$10,580	-	198570	00297300
Information Science/Studies	Certificate	Guilford Technical Community College	601 High Point Rd., Jamestown, North Carolina 27282	www.gtcc.edu	2-year, Public	Less than one year certificate;One but less than two years certificate;Associate's degree	Suburb: Midsize	No	12430	12430	12%	28%	Fall 2011	$11,922	-	198622	00483800
Information Science/Studies	Certificate	Hudson Valley Community College	80 Vandenburgh Ave, Troy, New York 12180	www.hvcc.edu	2-year, Public	One but less than two years certificate;Associate's degree	City: Small	No	12177	12177	27%	14%	Fall 2011	$8,829	-	191719	00286800
Information Science/Studies	Certificate	Idaho State University	921 S 8th Ave, Pocatello, Idaho 83209	www.isu.edu/	4-year, Public	Less than one year certificate;One but less than two years certificate;Associate's degree;Two but less than 4 years certificate;Bachelor's degree;Postbaccalaureate certificate;Master's degree;Post-master's certificate;Doctor's degree - research/scholarship;Doctor's degree - professional practice	City: Small	Yes	13429	11517	33%	23%	Fall 2008	$13,695	-	142276	00162000
Information Science/Studies	Certificate	Ivy Tech Community College	50 W. Fall Creek Parkway N. Drive, Indianapolis, Indiana 46208-5752	www.ivytech.edu	2-year, Public	Less than one year certificate;One but less than two years certificate;Associate's degree	City: Large	No	91179	91179	8%	17%	Fall 2011	$6,729	-	150987	00991700
Information Science/Studies	Certificate	John A Logan College	700 Logan College Road, Carterville, Illinois 62918-2500	https://www.jalc.edu	2-year, Public	Less than one year certificate;One but less than two years certificate;Associate's degree	Suburb: Small	No	6718	6718	23%	22%	Fall 2011	$3,312	-	146205	00807600
Information Science/Studies	Certificate	Lake Land College	5001 Lake Land Blvd, Mattoon, Illinois 61938	www.lakeland.cc.il.us	2-year, Public	Less than one year certificate;One but less than two years certificate;Associate's degree	Town: Distant	No	5593	5593	34%	20%	Fall 2011	$5,149	-	146506	00764400
Information Science/Studies	Certificate	Lane Community College	4000 E 30th Ave, Eugene, Oregon 97405-0640	www.Lanecc.edu	2-year, Public	Less than one year certificate;One but less than two years certificate;Associate's degree;Two but less than 4 years certificate	Rural: Fringe	Yes	9236	9236	10%	20%	Fall 2011	$7,880	-	209038	00319600
Information Science/Studies	Certificate	Manchester Community College	Great Path, Manchester, Connecticut 06040	www.manchestercc.edu/	2-year, Public	Less than one year certificate;One but less than two years certificate;Associate's degree	Suburb: Large	No	7300	7300	16%	25%	Fall 2011	$4,317	-	129695	00139200
Information Science/Studies	Certificate	Martin Community College	1161 Kehukee Pk Rd, Williamston, North Carolina 27892-9988	www.martincc.edu	2-year, Public	Less than one year certificate;One but less than two years certificate;Associate's degree	Rural: Fringe	No	477	477	6%	NA	Fall 2011	$6,690	-	198905	00798800
Information Science/Studies	Certificate	McDowell Technical Community College	54 College Drive, Marion, North Carolina 28752-8728	www.mcdowelltech.edu	2-year, Public	Less than one year certificate;One but less than two years certificate;Associate's degree	Rural: Fringe	No	1056	1056	13%	15%	Fall 2011	$4,971	-	198923	00808500
Information Science/Studies	Certificate	Metropolitan Community College Area	30 & Fort Street, Omaha, Nebraska 68111-1610	www.mccneb.edu	2-year, Public	Less than one year certificate;One but less than two years certificate;Associate's degree	City: Large	No	14675	14675	14%	25%	Fall 2011	$6,333	-	181303	01258600
Information Science/Studies	Certificate	Metropolitan Community College-Kansas City	3200 Broadway, Kansas City, Missouri 64111-2429	www.mcckc.edu	2-year, Public	Less than one year certificate;One but less than two years certificate;Associate's degree	City: Large	No	18222	18222	16%	17%	Fall 2011	$7,843	-	177995	00248400
Information Science/Studies	Certificate	Minneapolis Community and Technical College	1501 Hennepin Ave, Minneapolis, Minnesota 55403-1779	www.minneapolis.edu	2-year, Public	Less than one year certificate;One but less than two years certificate;Associate's degree;Two but less than 4 years certificate	City: Large	No	9237	9237	14%	21%	Fall 2011	$13,892	-	174136	00236200
Information Science/Studies	Certificate	Mitchell Community College	500 W Broad Street, Statesville, North Carolina 28677-5293	www.mitchellcc.edu	2-year, Public	Less than one year certificate;One but less than two years certificate;Associate's degree	Suburb: Large	No	3106	3106	20%	9%	Fall 2011	$8,752	-	198987	00294700
Information Science/Studies	Certificate	Nash Community College	522 N. Old Carriage Road, Rocky Mount, North Carolina 27804	www.nashcc.edu	2-year, Public	Less than one year certificate;One but less than two years certificate;Associate's degree	Rural: Fringe	No	3537	3537	8%	NA	Fall 2011	$7,297	-	199087	00855700
Information Science/Studies	Certificate	Normandale Community College	9700 France Ave S, Bloomington, Minnesota 55431-4399	www.normandale.edu	2-year, Public	Less than one year certificate;Associate's degree	City: Small	No	9539	9539	19%	31%	Fall 2011	$13,350	-	174428	00795400
Information Science/Studies	Certificate	North Central Texas College	1525 W California Street, Gainesville, Texas 76240-4699	www.nctc.edu	2-year, Public	One but less than two years certificate;Associate's degree	Town: Distant	Yes	10169	10169	14%	22%	Fall 2011	$4,940	-	224110	00355800
Information Science/Studies	Certificate	Norwalk Community College	188 Richards Avenue, Norwalk, Connecticut 06854	www.ncc.commnet.edu	2-year, Public	Less than one year certificate;Associate's degree	City: Small	No	6363	6363	9%	21%	Fall 2011	$7,897	-	130004	00139900
Information Science/Studies	Certificate	Nunez Community College	3710 Paris Rd, Chalmette, Louisiana 70043	www.nunez.edu	2-year, Public	Less than one year certificate;One but less than two years certificate;Associate's degree	Suburb: Large	No	2617	2617	12%	NA	Fall 2011	$8,770	-	158884	02166100
Information Science/Studies	Certificate	Oakton Community College	1600 E Golf Rd., Des Plaines, Illinois 60016-1268	www.oakton.edu	2-year, Public	Less than one year certificate;One but less than two years certificate;Associate's degree	City: Small	No	10589	10589	17%	37%	Fall 2011	$6,030	-	147800	00989600
Information Science/Studies	Certificate	Pace University-New York	1 Pace Plaza, New York, New York 10038-1598	www.pace.edu	4-year, Private not-for-profit	Less than one year certificate;Associate's degree;Bachelor's degree;Postbaccalaureate certificate;Master's degree;Post-master's certificate;Doctor's degree - research/scholarship;Doctor's degree - professional practice	City: Large	Yes	12857	8694	55%	NA	Fall 2008	$29,641	-	194310	00279100
Information Science/Studies	Certificate	Pamlico Community College	5049 Hwy 306 South, Grantsboro, North Carolina 28529	www.pamlicocc.edu	2-year, Public	Less than one year certificate;One but less than two years certificate;Associate's degree	Rural: Distant	No	410	410	18%	NA	Fall 2011	$3,288	-	199263	00703100
Information Science/Studies	Certificate	Panola College	1109 W Panola Street, Carthage, Texas 75633-2397	www.panola.edu	2-year, Public	Less than one year certificate;One but less than two years certificate;Associate's degree	Town: Distant	Yes	2564	2564	20%	17%	Fall 2011	$9,263	-	227386	00360000
Information Science/Studies	Certificate	Pennsylvania State University-Main Campus	201 Old Main, University Park, Pennsylvania 16802	www.psu.edu/	4-year, Public	Less than one year certificate;One but less than two years certificate;Associate's degree;Bachelor's degree;Postbaccalaureate certificate;Master's degree;Doctor's degree - research/scholarship;Doctor's degree - professional practice	City: Small	Yes	47040	40541	86%	NA	Fall 2008	$24,220	-	214777	00332900
Information Science/Studies	Certificate	Piedmont Community College	1715 College Dr, Roxboro, North Carolina 27573	www.piedmontcc.edu	2-year, Public	Less than one year certificate;One but less than two years certificate;Associate's degree	Rural: Fringe	No	1475	1475	14%	20%	Fall 2011	$8,671	-	199324	00964600
Information Science/Studies	Certificate	Pikes Peak Community College	5675 S Academy Blvd, Colorado Springs, Colorado 80906-5498	www.ppcc.edu	2-year, Public	Less than one year certificate;One but less than two years certificate;Associate's degree	Suburb: Large	No	13947	13947	12%	17%	Fall 2011	$9,854	-	127820	00889600
Information Science/Studies	Certificate	Pitt Community College	1986 Pitt Tech Road, Winterville, North Carolina 28590	www.pittcc.edu	2-year, Public	Less than one year certificate;One but less than two years certificate;Associate's degree	Suburb: Midsize	No	8872	8872	12%	33%	Fall 2011	$5,015	-	199333	00406200
Information Science/Studies	Certificate	Radford University	801 East Main Street, Radford, Virginia 24142	www.radford.edu	4-year, Public	Less than one year certificate;Bachelor's degree;Postbaccalaureate certificate;Master's degree;Post-master's certificate;Doctor's degree	City: Small	Yes	9798	8885	59%	NA	Fall 2008	$13,875	-	233277	00373200
Information Science/Studies	Certificate	Rowan-Cabarrus Community College	1333 Jake Alexander Blvd, Salisbury, North Carolina 28146-1595	www.rccc.edu/	2-year, Public	Less than one year certificate;One but less than two years certificate;Associate's degree	Suburb: Midsize	No	6420	6420	13%	NA	Fall 2011	$5,636	-	199494	00575400
Information Science/Studies	Certificate	Schenectady County Community College	78 Washington Avenue, Schenectady, New York 12305	www.sunysccc.edu	2-year, Public	One but less than two years certificate;Associate's degree	City: Small	No	6497	6497	14%	15%	Fall 2011	$3,904	-	195322	00678500
Information Science/Studies	Certificate	Shawnee Community College	8364 Shawnee College Rd, Ullin, Illinois 62992	www.shawneecc.edu	2-year, Public	Less than one year certificate;One but less than two years certificate;Associate's degree	Rural: Distant	No	1799	1799	26%	31%	Fall 2011	$12,164	-	148821	00769300
Information Science/Studies	Certificate	Shenandoah University	1460 University Dr, Winchester, Virginia 22601-5195	www.su.edu	4-year, Private not-for-profit	Less than one year certificate;One but less than two years certificate;Bachelor's degree;Postbaccalaureate certificate;Master's degree;Post-master's certificate;Doctor's degree - research/scholarship;Doctor's degree - professional practice	City: Small	Yes	3693	1892	55%	NA	Fall 2008	$28,306	-	233541	00373700
Information Science/Studies	Certificate	South Suburban College	15800 South State Street, South Holland, Illinois 60473-1200	www.ssc.edu/	2-year, Public	Less than one year certificate;One but less than two years certificate;Associate's degree	Suburb: Large	No	4329	4329	18%	49%	Fall 2011	$4,390	-	149365	00176900
Information Science/Studies	Certificate	Southern University at Shreveport	3050 Martin Luther King Dr, Shreveport, Louisiana 71107	www.susla.edu	2-year, Public	One but less than two years certificate;Associate's degree	City: Midsize	Yes	2952	2952	11%	NA	Fall 2011	$8,690	-	160649	00768600
Information Science/Studies	Certificate	Strayer University-Alabama	3570 Grandview Pkwy Ste 200, Birmingham, Alabama 35243	www.strayer.edu/alabama/birmingham	4-year, Private for-profit	Less than one year certificate;One but less than two years certificate;Associate's degree;Bachelor's degree;Postbaccalaureate certificate;Master's degree	City: Midsize	No	833	422	0%	NA	Fall 2008	$31,954	-	450377	00145953
Information Science/Studies	Certificate	Strayer University-Arkansas	10825 Financial Centre Pkwy Ste 400, Little Rock, Arkansas 72211	www.strayer.edu/arkansas/little-rock	4-year, Private for-profit	Less than one year certificate;One but less than two years certificate;Associate's degree;Bachelor's degree;Postbaccalaureate certificate;Master's degree	City: Midsize	No	259	152	NA	NA	Fall 2008	NA	-	458885	00145984
Information Science/Studies	Certificate	Strayer University-Delaware	240 Continental Dr Ste 108, Newark, Delaware 19713	www.strayer.edu/delaware/christiana	4-year, Private for-profit	Less than one year certificate;One but less than two years certificate;Associate's degree;Bachelor's degree;Postbaccalaureate certificate;Master's degree	Suburb: Large	No	335	237	50%	NA	Fall 2008	NA	-	450298	00145948
Information Science/Studies	Certificate	Strayer University-District of Columbia	1133 15th St NW, Washington, District of Columbia 20005	www.strayer.edu/district-columbia/washington	4-year, Private for-profit	Less than one year certificate;One but less than two years certificate;Associate's degree;Bachelor's degree;Postbaccalaureate certificate;Master's degree	City: Large	No	1192	783	26%	NA	Fall 2008	$30,553	-	131803	00145900
Information Science/Studies	Certificate	Strayer University-Florida	4902 Eisenhower Blvd Ste 100, Tampa, Florida 33634	www.strayer.edu/florida/tampa-westshore	4-year, Private for-profit	Less than one year certificate;One but less than two years certificate;Associate's degree;Bachelor's degree;Postbaccalaureate certificate;Master's degree	Suburb: Large	No	2769	1927	44%	NA	Fall 2008	$28,671	-	449038	00145942
Information Science/Studies	Certificate	Strayer University-Georgia	3355 Northeast Expwy, Ste 100, Atlanta, Georgia 30341	www.strayer.edu/georgia/chamblee	4-year, Private for-profit	Less than one year certificate;One but less than two years certificate;Associate's degree;Bachelor's degree;Postbaccalaureate certificate;Master's degree	Suburb: Large	No	5296	3627	19%	NA	Fall 2008	$29,674	-	458919	00145939
Information Science/Studies	Certificate	Strayer University-Global Region	1133 15th St NW, Washington, District of Columbia 20005	www.strayer.edu	4-year, Private for-profit	Less than one year certificate;One but less than two years certificate;Associate's degree;Bachelor's degree;Postbaccalaureate certificate;Master's degree	City: Large	No	4500	2766	13%	NA	Fall 2008	$28,535	-	459994	00145900
Information Science/Studies	Certificate	Strayer University-Louisiana	111 Veterans Memorial Blvd, Ste 420, Metairie, Louisiana 70005	www.strayer.edu/louisiana/metairie	4-year, Private for-profit	Less than one year certificate;One but less than two years certificate;Associate's degree;Bachelor's degree;Postbaccalaureate certificate;Master's degree	City: Midsize	No	155	114	NA	NA	Fall 2008	$27,360	-	458937	00145988
Information Science/Studies	Certificate	Strayer University-Maryland	4710 Auth Pl 1st Fl, Suitland, Maryland 20746	www.strayer.edu/maryland/prince-georges	4-year, Private for-profit	Less than one year certificate;One but less than two years certificate;Associate's degree;Bachelor's degree;Postbaccalaureate certificate;Master's degree	Suburb: Large	No	2873	1966	22%	NA	Fall 2008	$28,771	-	430184	00145911
Information Science/Studies	Certificate	Strayer University-Mississippi	460 Briarwood Dr, Jackson, Mississippi 39206	www.strayer.edu/mississippi/jackson	4-year, Private for-profit	Less than one year certificate;One but less than two years certificate;Associate's degree;Bachelor's degree;Postbaccalaureate certificate;Master's degree	City: Midsize	No	276	159	NA	NA	Fall 2008	NA	-	458955	00145991
Information Science/Studies	Certificate	Strayer University-New Jersey	2201 Rte 38 Ste 100, Cherry Hill, New Jersey 08002	www.strayer.edu/new-jersey/cherry-hill	4-year, Private for-profit	Less than one year certificate;One but less than two years certificate;Associate's degree;Bachelor's degree;Postbaccalaureate certificate;Master's degree	Suburb: Large	No	858	648	9%	NA	Fall 2008	$26,419	-	453215	00145961
Information Science/Studies	Certificate	Strayer University-North Carolina	4 Copley Pkwy, Morrisville, North Carolina 27560	www.strayer.edu/north-carolina/rtp	4-year, Private for-profit	Less than one year certificate;One but less than two years certificate;Associate's degree;Bachelor's degree;Postbaccalaureate certificate;Master's degree	Suburb: Large	No	4092	2500	13%	NA	Fall 2008	$30,447	-	453163	00145929
Information Science/Studies	Certificate	Strayer University-Pennsylvania	3600 Horizon Blvd Ste 100, Trevose, Pennsylvania 19053	www.strayer.edu/pennsylvania/lower-bucks-county	4-year, Private for-profit	Less than one year certificate;One but less than two years certificate;Associate's degree;Bachelor's degree;Postbaccalaureate certificate;Master's degree	Suburb: Large	No	2103	1538	7%	NA	Fall 2008	$23,720	-	443784	00145935
Information Science/Studies	Certificate	Strayer University-South Carolina	555 N Pleasantburg Dr Ste 300, Greenville, South Carolina 29607	www.strayer.edu/south-carolina/greenville	4-year, Private for-profit	Less than one year certificate;One but less than two years certificate;Associate's degree;Bachelor's degree;Postbaccalaureate certificate;Master's degree	City: Small	No	1991	1206	20%	NA	Fall 2008	$29,193	-	458964	00145937
Information Science/Studies	Certificate	Strayer University-Tennessee	2620 Thousand Oaks Blvd Ste 1100, Memphis, Tennessee 38118	www.strayer.edu/tennessee/thousand-oaks	4-year, Private for-profit	Less than one year certificate;One but less than two years certificate;Associate's degree;Bachelor's degree;Postbaccalaureate certificate;Master's degree	City: Large	No	1960	1275	38%	NA	Fall 2008	$29,291	-	443766	00145932
Information Science/Studies	Certificate	Strayer University-Texas	8501 N. Mopac Expressway, Austin, Texas 78759	www.strayer.edu/texas/north-austin	4-year, Private for-profit	Less than one year certificate;One but less than two years certificate;Associate's degree;Bachelor's degree;Postbaccalaureate certificate;Master's degree	City: Large	No	1626	1220	NA	NA	Fall 2008	$29,376	-	458973	00145987
Information Science/Studies	Certificate	Strayer University-Virginia	2121 15th Street N, Arlington, Virginia 22207	www.strayer.edu/virginia/arlington	4-year, Private for-profit	Less than one year certificate;One but less than two years certificate;Associate's degree;Bachelor's degree;Postbaccalaureate certificate;Master's degree	City: Midsize	No	6850	4504	19%	NA	Fall 2008	$29,174	-	233684	00145901
Information Science/Studies	Certificate	Strayer University-West Virginia	100 Corporate Center Dr, Scott Depot, West Virginia 25560	www.strayer.edu/west-virginia/teays-valley	4-year, Private for-profit	Less than one year certificate;One but less than two years certificate;Associate's degree;Bachelor's degree;Postbaccalaureate certificate;Master's degree	Suburb: Midsize	No	191	156	NA	NA	Fall 2008	NA	-	456621	00145974
Information Science/Studies	Certificate	Suffolk County Community College	533 College Rd, Selden, New York 11784-2899	www3.sunysuffolk.edu	2-year, Public	One but less than two years certificate;Associate's degree	Suburb: Large	No	26600	26600	20%	8%	Fall 2011	$7,027	-	366395	00287800
Information Science/Studies	Certificate	Sullivan and Cogliano Training Center	4760 North West 167 Street, Miami Gardens, Florida 33014	www.sctrain.edu	< 2-year, Private for-profit	Less than one year certificate;One but less than two years certificate	Suburb: Large	No	627	627	62%	NA	2011-12	$13,271	Executive Assistant/Executive Secretary	433466	04039300
Information Science/Studies	Certificate	SUNY Westchester Community College	75 Grasslands Road, Valhalla, New York 10595	www.sunywcc.edu	2-year, Public	One but less than two years certificate;Associate's degree	Suburb: Large	No	13916	13916	12%	20%	Fall 2011	$6,027	-	197294	00288100
Information Science/Studies	Certificate	Surry Community College	630 S. Main St., Dobson, North Carolina 27017-8432	www.surry.edu	2-year, Public	Less than one year certificate;One but less than two years certificate;Associate's degree	Rural: Distant	No	3294	3294	23%	22%	Fall 2011	$8,994	-	199768	00297000
Information Science/Studies	Certificate	Texas Tech University	Broadway and University Avenue, Lubbock, Texas 79409-5005	www.ttu.edu	4-year, Public	Less than one year certificate;Bachelor's degree;Postbaccalaureate certificate;Master's degree;Doctor's degree - research/scholarship;Doctor's degree - professional practice	City: Midsize	Yes	35158	28632	59%	NA	Fall 2008	$13,901	-	229115	00364400
Information Science/Studies	Certificate	The University of Tennessee-Chattanooga	615 McCallie Ave, Chattanooga, Tennessee 37403-2598	www.utc.edu	4-year, Public	Less than one year certificate;Bachelor's degree;Postbaccalaureate certificate;Master's degree;Post-master's certificate;Doctor's degree - research/scholarship;Doctor's degree - professional practice	City: Midsize	Yes	11670	10315	40%	NA	Fall 2008	$12,267	-	221740	00352900
Information Science/Studies	Certificate	Triton College	2000 5th Ave, River Grove, Illinois 60171-1995	www.triton.edu	2-year, Public	Less than one year certificate;One but less than two years certificate;Associate's degree	Suburb: Large	No	11577	11577	12%	26%	Fall 2011	$4,977	-	149532	00177300
Information Science/Studies	Certificate	University of Cincinnati-Clermont College	4200 Clermont College Dr, Batavia, Ohio 45103	www.ucclermont.edu/	4-year, primarily associate's, Public	Less than one year certificate;One but less than two years certificate;Associate's degree;Bachelor's degree;Postbaccalaureate certificate	Suburb: Large	No	3246	3246	24%	17%	Fall 2008	$12,763	-	201946	00312501
Information Science/Studies	Certificate	University of Maryland-Baltimore County	1000 Hilltop Circle, Baltimore, Maryland 21250	www.umbc.edu	4-year, Public	Bachelor's degree;Postbaccalaureate certificate;Master's degree;Doctor's degree - research/scholarship	Suburb: Large	Yes	13979	11379	61%	25%	Fall 2008	$14,137	-	163268	00210500
Information Science/Studies	Certificate	University of Maryland-University College	3501 University Blvd East, Adelphi, Maryland 20783-8010	www.umuc.edu	4-year, Public	Associate's degree;Two but less than 4 years certificate;Bachelor's degree;Postbaccalaureate certificate;Master's degree;Doctor's degree - professional practice	Suburb: Large	No	47906	35154	8%	23%	Fall 2008	$10,588	-	163204	01164400
Information Science/Studies	Certificate	University of Massachusetts-Lowell	1 University Ave, Lowell, Massachusetts 01854-5104	www.uml.edu	4-year, Public	Less than one year certificate;Associate's degree;Bachelor's degree;Postbaccalaureate certificate;Master's degree;Post-master's certificate;Doctor's degree - research/scholarship;Doctor's degree - professional practice	Suburb: Large	Yes	17179	12983	54%	NA	Fall 2008	$15,965	-	166513	00216100
Information Science/Studies	Certificate	University of Richmond	28 Westhampton Way, University of Richmond, Virginia 23173	www.richmond.edu	4-year, Private not-for-profit	Less than one year certificate;One but less than two years certificate;Associate's degree;Bachelor's degree;Postbaccalaureate certificate;Master's degree;Post-master's certificate;Doctor's degree - professional practice	City: Midsize	Yes	4182	3346	84%	NA	Fall 2008	$24,011	-	233374	00374400
Information Science/Studies	Certificate	University of Scranton	800 Linden Street, Scranton, Pennsylvania 18510-4629	www.scranton.edu	4-year, Private not-for-profit	One but less than two years certificate;Associate's degree;Bachelor's degree;Postbaccalaureate certificate;Master's degree;Post-master's certificate;Doctor's degree - professional practice	City: Small	Yes	5589	3998	80%	NA	Fall 2008	$33,353	-	215929	00338400
Information Science/Studies	Certificate	University of South Alabama	307 N University Blvd, Mobile, Alabama 36688-0002	www.southalabama.edu	4-year, Public	Less than one year certificate;One but less than two years certificate;Two but less than 4 years certificate;Bachelor's degree;Postbaccalaureate certificate;Master's degree;Post-master's certificate;Doctor's degree - research/scholarship;Doctor's degree - professional practice	City: Midsize	Yes	15805	11479	38%	32%	Fall 2008	$12,066	-	102094	00105700
Information Science/Studies	Certificate	Vance-Granville Community College	200 Community College Road, Henderson, North Carolina 27537	www.vgcc.edu	2-year, Public	Less than one year certificate;One but less than two years certificate;Associate's degree	Town: Distant	No	4025	4025	23%	17%	Fall 2011	$6,061	-	199838	00990300
Information Science/Studies	Certificate	Wake Technical Community College	9101 Fayetteville Road, Raleigh, North Carolina 27603-5696	www.waketech.edu/	2-year, Public	Less than one year certificate;One but less than two years certificate;Associate's degree	Suburb: Large	No	21384	21384	14%	32%	Fall 2011	$9,129	-	199856	00484400
Information Science/Studies	Certificate	Zane State College	1555 Newark Rd, Zanesville, Ohio 43701-2626	www.zanestate.edu	2-year, Public	Less than one year certificate;One but less than two years certificate;Associate's degree	Town: Distant	No	4009	4009	30%	3%	Fall 2011	$8,287	-	204255	00813300
		* Cohort Year represents the year for which students began their studies and applies to Graduation and Transfer Out Rates.
		** Net Price is Average Net Price for 2013-2014 generated for full-time beginning undergraduate students who were awarded grant or scholarship aid from federal, state or local governments, or the institution. For public institutions only students paying the in-state or in-district rate are included. For institutions that charge students by program, net price is generated for the institution’s lar…
		NA (Not applicable) - Graduation rate, transfer-out rate and the net price are not applicable to institutions that do not have full-time, first-time degree-seeking undergraduate students in the applicable cohort year or the financial aid year.
		National Center for Education Statistics
		College Navigator
		Generated at:9/4/2015 11:31:09 AM from URL:http://nces.ed.gov/collegenavigator/default.aspx?s=all&p=11.0401&l=93&xp=1
		Name	Address	Website	Type	Awards offered	Campus setting	Campus housing	Student population	Undergraduate students	Graduation Rate	Transfer-Out Rate	Cohort Year *	Net Price **	Largest Program	IPEDS ID	OPE ID
Information Science/Studies	Bachelors	Adelphi University	South Ave, Garden City, New York 11530-0701	www.adelphi.edu/	4-year, Private not-for-profit	One but less than two years certificate;Associate's degree;Bachelor's degree;Postbaccalaureate certificate;Master's degree;Post-master's certificate;Doctor's degree - research/scholarship;Doctor's degree - professional practice	Suburb: Large	Yes	7610	5071	64%	27%	Fall 2008	$25,441	-	188429	00266600
Information Science/Studies	Bachelors	Alabama State University	915 S Jackson Street, Montgomery, Alabama 36104-0271	www.alasu.edu	4-year, Public	Bachelor's degree;Master's degree;Post-master's certificate;Doctor's degree - research/scholarship;Doctor's degree - professional practice	City: Midsize	Yes	5519	4812	26%	NA	Fall 2008	$10,905	-	100724	00100500
Information Science/Studies	Bachelors	Albright College	1621 N. 13th St., Reading, Pennsylvania 19612-5234	www.albright.edu	4-year, Private not-for-profit	One but less than two years certificate;Bachelor's degree;Master's degree	City: Small	Yes	2393	2360	53%	NA	Fall 2008	$21,497	-	210571	00322900
Information Science/Studies	Bachelors	Anderson University	1100 E 5th St, Anderson, Indiana 46012-3495	www.anderson.edu	4-year, Private not-for-profit	Associate's degree;Bachelor's degree;Master's degree;Doctor's degree - research/scholarship	City: Small	Yes	2399	1976	63%	NA	Fall 2008	$23,229	-	150066	00178500
Information Science/Studies	Bachelors	Armstrong State University	11935 Abercorn St, Savannah, Georgia 31419-1997	www.armstrong.edu	4-year, Public	Less than one year certificate;One but less than two years certificate;Associate's degree;Bachelor's degree;Postbaccalaureate certificate;Master's degree;Post-master's certificate;Doctor's degree - professional practice	City: Midsize	Yes	7094	6346	30%	22%	Fall 2008	$14,013	-	138789	00154600
Information Science/Studies	Bachelors	Atlantic University College	Colton St. # 9, Guaynabo, Puerto Rico 00970	www.atlanticu.edu	4-year, Private not-for-profit	Associate's degree;Bachelor's degree;Master's degree	City: Small	No	1496	1425	36%	NA	Fall 2008	$5,318	-	241216	02505400
Information Science/Studies	Bachelors	Averett University	420 W Main St, Danville, Virginia 24541	www.averett.edu	4-year, Private not-for-profit	Associate's degree;Bachelor's degree;Master's degree	Town: Distant	Yes	872	852	33%	NA	Fall 2008	$23,414	-	231420	00370200
Information Science/Studies	Bachelors	Averett University-Non-Traditional Programs	420 W Main St, Danville, Virginia 24541	gps.averett.edu/	4-year, Private not-for-profit	Associate's degree;Bachelor's degree;Master's degree	Town: Distant	No	1118	702	0%	NA	Fall 2008	$25,180	-	449931	00370200
Information Science/Studies	Bachelors	Barry University	11300 NE 2nd Ave, Miami, Florida 33161-6695	www.barry.edu	4-year, Private not-for-profit	Bachelor's degree;Postbaccalaureate certificate;Master's degree;Post-master's certificate;Doctor's degree - research/scholarship;Doctor's degree - professional practice;Doctor's degree - other	Suburb: Large	Yes	8518	3996	36%	47%	Fall 2008	$24,610	-	132471	00146600
Information Science/Studies	Bachelors	Bemidji State University	1500 Birchmont Dr, Bemidji, Minnesota 56601	www.bemidjistate.edu	4-year, Public	Less than one year certificate;Associate's degree;Bachelor's degree;Postbaccalaureate certificate;Master's degree	Town: Remote	Yes	4986	4754	46%	35%	Fall 2008	$13,488	-	173124	00233600
Information Science/Studies	Bachelors	Benedict College	1600 Harden Street, Columbia, South Carolina 29204-1086	www.benedict.edu	4-year, Private not-for-profit	Bachelor's degree	City: Midsize	Yes	2444	2444	31%	NA	Fall 2008	$17,128	-	217721	00342000
Information Science/Studies	Bachelors	Benedictine University	5700 College Rd, Lisle, Illinois 60532-0900	www.ben.edu	4-year, Private not-for-profit	Less than one year certificate;Associate's degree;Bachelor's degree;Postbaccalaureate certificate;Master's degree;Doctor's degree - research/scholarship	Suburb: Large	Yes	6307	3818	51%	3%	Fall 2008	$19,895	-	145619	00176700
Information Science/Studies	Bachelors	Bethune-Cookman University	640 Dr Mary McLeod Bethune Blvd, Daytona Beach, Florida 32114-3099	www.cookman.edu	4-year, Private not-for-profit	Bachelor's degree;Master's degree	City: Small	Yes	4044	3899	50%	NA	Fall 2008	$16,193	-	132602	00146700
Information Science/Studies	Bachelors	Boise State University	1910 University Dr, Boise, Idaho 83725	www.boisestate.edu	4-year, Public	Associate's degree;Bachelor's degree;Postbaccalaureate certificate;Master's degree;Post-master's certificate;Doctor's degree - research/scholarship	City: Midsize	Yes	22227	19333	36%	24%	Fall 2008	$15,847	-	142115	00161600
Information Science/Studies	Bachelors	Boston College	140 Commonwealth Avenue, Chestnut Hill, Massachusetts 02467	www.bc.edu	4-year, Private not-for-profit	Bachelor's degree;Master's degree;Post-master's certificate;Doctor's degree - research/scholarship;Doctor's degree - professional practice	City: Small	Yes	14317	9856	91%	6%	Fall 2008	$26,335	-	164924	00212800
Information Science/Studies	Bachelors	Bradley University	1501 W Bradley Ave, Peoria, Illinois 61625-0001	www.bradley.edu	4-year, Private not-for-profit	Bachelor's degree;Postbaccalaureate certificate;Master's degree;Post-master's certificate;Doctor's degree - professional practice	City: Midsize	Yes	5300	4588	74%	NA	Fall 2008	$27,451	-	143358	00164100
Information Science/Studies	Bachelors	Brigham Young University-Hawaii	55-220 Kulanui Street, Laie, Hawaii 96762-1294	www.byuh.edu/	4-year, Private not-for-profit	Associate's degree;Bachelor's degree	Town: Fringe	Yes	2787	2787	55%	NA	Fall 2008	$11,948	-	230047	00160600
Information Science/Studies	Bachelors	Butler University	4600 Sunset Ave, Indianapolis, Indiana 46208	www.butler.edu	4-year, Private not-for-profit	Associate's degree;Bachelor's degree;Master's degree;Doctor's degree - professional practice	City: Large	Yes	4848	4062	78%	NA	Fall 2008	$32,742	-	150163	00178800
Information Science/Studies	Bachelors	California Lutheran University	60 W Olsen Rd, Thousand Oaks, California 91360-2787	www.callutheran.edu/	4-year, Private not-for-profit	Bachelor's degree;Master's degree;Post-master's certificate;Doctor's degree - professional practice	City: Midsize	Yes	4160	2808	66%	30%	Fall 2008	$29,614	-	110413	00113300
Information Science/Studies	Bachelors	California State University-Los Angeles	5151 State University Dr, Los Angeles, California 90032	www.calstatela.edu	4-year, Public	Bachelor's degree;Postbaccalaureate certificate;Master's degree;Doctor's degree - research/scholarship	City: Large	Yes	24488	20681	41%	2%	Fall 2008	$2,735	-	110592	00114000
Information Science/Studies	Bachelors	California State University-Northridge	18111 Nordhoff St, Northridge, California 91330	www.csun.edu	4-year, Public	Bachelor's degree;Master's degree;Doctor's degree - research/scholarship	City: Large	Yes	40131	35616	47%	12%	Fall 2008	$7,654	-	110608	00115300
Information Science/Studies	Bachelors	California State University-Stanislaus	One University Circle, Turlock, California 95382-0299	www.csustan.edu	4-year, Public	Bachelor's degree;Master's degree;Doctor's degree	Suburb: Small	Yes	9045	7847	53%	4%	Fall 2008	$6,340	-	110495	00115700
Information Science/Studies	Bachelors	Carlow University	3333 Fifth Ave, Pittsburgh, Pennsylvania 15213-3165	www.carlow.edu	4-year, Private not-for-profit	Less than one year certificate;One but less than two years certificate;Bachelor's degree;Postbaccalaureate certificate;Master's degree;Post-master's certificate;Doctor's degree - professional practice	City: Large	Yes	2201	1345	60%	NA	Fall 2008	$18,099	-	211431	00330300
Information Science/Studies	Bachelors	Cedar Crest College	100 College Drive, Allentown, Pennsylvania 18104-6196	www.cedarcrest.edu	4-year, Private not-for-profit	Less than one year certificate;One but less than two years certificate;Two but less than 4 years certificate;Bachelor's degree;Postbaccalaureate certificate;Master's degree	City: Midsize	Yes	1531	1342	69%	3%	Fall 2008	$17,981	-	211468	00324300
Information Science/Studies	Bachelors	Central College	812 University, Pella, Iowa 50219	www.central.edu	4-year, Private not-for-profit	Bachelor's degree	Town: Distant	Yes	1411	1411	68%	NA	Fall 2008	$22,510	-	153108	00185000
Information Science/Studies	Bachelors	Chadron State College	1000 Main St, Chadron, Nebraska 69337-2690	www.csc.edu	4-year, Public	Bachelor's degree;Master's degree	Town: Remote	Yes	3033	2453	36%	32%	Fall 2008	$11,344	-	180948	00253900
Information Science/Studies	Bachelors	Christopher Newport University	1 Avenue of the Arts, Newport News, Virginia 23606-3072	www.cnu.edu	4-year, Public	Bachelor's degree;Master's degree	City: Midsize	Yes	5221	5096	68%	NA	Fall 2008	$20,996	-	231712	00370600
Information Science/Studies	Bachelors	Clarion University of Pennsylvania	840 Wood St, Clarion, Pennsylvania 16214	www.clarion.edu	4-year, Public	Less than one year certificate;Associate's degree;Bachelor's degree;Postbaccalaureate certificate;Master's degree;Post-master's certificate	Town: Remote	Yes	5712	4911	50%	NA	Fall 2008	$15,311	-	211644	00331800
Information Science/Studies	Bachelors	Clayton State University	2000 Clayton State Boulevard, Morrow, Georgia 30260-0285	www.clayton.edu	4-year, Public	Less than one year certificate;One but less than two years certificate;Associate's degree;Bachelor's degree;Master's degree	Suburb: Large	Yes	7022	6632	33%	27%	Fall 2008	$10,898	-	139311	00897600
Information Science/Studies	Bachelors	Clearwater Christian College	3400 Gulf to Bay Blvd, Clearwater, Florida 33759-4595	www.clearwater.edu	4-year, Private not-for-profit	Associate's degree;Bachelor's degree;Master's degree	City: Midsize	Yes	421	412	50%	NA	Fall 2008	$20,133	-	133085	00147300
Information Science/Studies	Bachelors	Clemson University	201 Sikes Hall, Clemson, South Carolina 29634	www.clemson.edu	4-year, Public	Less than one year certificate;One but less than two years certificate;Bachelor's degree;Postbaccalaureate certificate;Master's degree;Doctor's degree - research/scholarship	Suburb: Large	Yes	21857	17260	82%	13%	Fall 2008	$16,799	-	217882	00342500
Information Science/Studies	Bachelors	Coastal Carolina University	103 Tom Trout Drive, Conway, South Carolina 29526	www.coastal.edu	4-year, Public	Bachelor's degree;Postbaccalaureate certificate;Master's degree;Post-master's certificate;Doctor's degree - research/scholarship	City: Small	Yes	9976	9364	45%	17%	Fall 2008	$14,231	-	218724	00345100
Information Science/Studies	Bachelors	Colegio Universitario de San Juan	180 Jose Oliver St Tres Monjitas Ind. Park, San Juan, Puerto Rico 00918	www.cunisanjuan.edu	4-year, Public	Less than one year certificate;Associate's degree;Bachelor's degree	City: Large	No	1405	1405	33%	12%	Fall 2008	$1,065	-	241720	01056700
Information Science/Studies	Bachelors	College of Charleston	66 George St, Charleston, South Carolina 29424-0001	www.cofc.edu	4-year, Public	Bachelor's degree;Postbaccalaureate certificate;Master's degree;Post-master's certificate	City: Midsize	Yes	11456	10440	67%	26%	Fall 2008	$17,609	-	217819	00342800
Information Science/Studies	Bachelors	College of Staten Island CUNY	2800 Victory Blvd, Staten Island, New York 10314	www.csi.cuny.edu	4-year, Public	Less than one year certificate;Associate's degree;Bachelor's degree;Postbaccalaureate certificate;Master's degree;Post-master's certificate;Doctor's degree - professional practice	City: Large	Yes	14346	13345	27%	32%	Fall 2008	$9,575	-	190558	00269800
Information Science/Studies	Bachelors	Colorado State University-Fort Collins	102 Administration Building, Fort Collins, Colorado 80523-0100	www.colostate.edu	4-year, Public	Bachelor's degree;Postbaccalaureate certificate;Master's degree;Doctor's degree - research/scholarship;Doctor's degree - professional practice	City: Midsize	Yes	31354	23598	65%	10%	Fall 2008	$14,511	-	126818	00135000
Information Science/Studies	Bachelors	Colorado State University-Pueblo	2200 Bonforte Blvd, Pueblo, Colorado 81001-4901	www.csupueblo.edu	4-year, Public	Bachelor's degree;Master's degree	City: Midsize	Yes	7256	5192	32%	15%	Fall 2008	$11,785	-	128106	00136500
Information Science/Studies	Bachelors	Columbia University in the City of New York	West 116 St and Broadway, New York, New York 10027	www.columbia.edu	4-year, Private not-for-profit	Bachelor's degree;Postbaccalaureate certificate;Master's degree;Post-master's certificate;Doctor's degree - research/scholarship;Doctor's degree - professional practice	City: Large	Yes	27589	8100	95%	NA	Fall 2008	$20,838	-	190150	00270700
Information Science/Studies	Bachelors	Concord University	100 Vermillion Street, Athens, West Virginia 24712	www.concord.edu	4-year, Public	Associate's degree;Bachelor's degree;Postbaccalaureate certificate;Master's degree	Town: Distant	Yes	2545	2243	34%	26%	Fall 2008	$7,224	-	237330	00381000
Information Science/Studies	Bachelors	Coppin State University	2500 West North Avenue, Baltimore, Maryland 21216-3698	www.coppin.edu	4-year, Public	Two but less than 4 years certificate;Bachelor's degree;Postbaccalaureate certificate;Master's degree;Post-master's certificate;Doctor's degree - professional practice	City: Large	Yes	3133	2684	18%	22%	Fall 2008	$9,407	-	162283	00206800
Information Science/Studies	Bachelors	CUNY Bernard M Baruch College	One Bernard Baruch Way (55 Lexington Ave at 24th St), New York, New York 10010	www.baruch.cuny.edu	4-year, Public	Bachelor's degree;Postbaccalaureate certificate;Master's degree;Post-master's certificate	City: Large	Yes	18090	14857	66%	18%	Fall 2008	$8,151	-	190512	00727300
Information Science/Studies	Bachelors	CUNY Brooklyn College	2900 Bedford Ave, Brooklyn, New York 11210	www.brooklyn.cuny.edu	4-year, Public	Less than one year certificate;One but less than two years certificate;Bachelor's degree;Postbaccalaureate certificate;Master's degree;Post-master's certificate	City: Large	Yes	17390	14115	50%	26%	Fall 2008	$7,220	-	190549	00268700
Information Science/Studies	Bachelors	CUNY Lehman College	250 Bedford Park Blvd W, Bronx, New York 10468	www.lehman.cuny.edu	4-year, Public	Less than one year certificate;Bachelor's degree;Postbaccalaureate certificate;Master's degree;Post-master's certificate	City: Large	Yes	12398	10326	37%	27%	Fall 2008	$2,327	-	190637	00702200
Information Science/Studies	Bachelors	CUNY Medgar Evers College	1650 Bedford Ave, Brooklyn, New York 11225	www.mec.cuny.edu	4-year, Public	One but less than two years certificate;Associate's degree;Bachelor's degree	City: Large	No	6701	6701	12%	36%	Fall 2008	$8,661	-	190646	01009700
Information Science/Studies	Bachelors	CUNY New York City College of Technology	300 Jay St, Brooklyn, New York 11201	www.citytech.cuny.edu	4-year, Public	Less than one year certificate;One but less than two years certificate;Associate's degree;Bachelor's degree	City: Large	No	17374	17374	15%	41%	Fall 2008	$7,033	-	190655	00269600
Information Science/Studies	Bachelors	Dakota State University	820 N Washington Ave, Madison, South Dakota 57042-1799	www.dsu.edu	4-year, Public	Less than one year certificate;One but less than two years certificate;Associate's degree;Bachelor's degree;Postbaccalaureate certificate;Master's degree;Doctor's degree - research/scholarship	Town: Distant	Yes	3047	2736	41%	38%	Fall 2008	$14,166	-	219082	00346300
Information Science/Studies	Bachelors	Davenport University	6191 Kraft Avenue S.E., Grand Rapids, Michigan 49512-9396	www.davenport.edu	4-year, Private not-for-profit	One but less than two years certificate;Associate's degree;Bachelor's degree;Postbaccalaureate certificate;Master's degree;Post-master's certificate	Suburb: Large	Yes	8715	6631	40%	NA	Fall 2008	$15,841	-	169479	00224900
Information Science/Studies	Bachelors	Davis & Elkins College	100 Campus Dr, Elkins, West Virginia 26241-3996	www.dewv.edu	4-year, Private not-for-profit	Associate's degree;Bachelor's degree	Town: Remote	Yes	846	846	37%	17%	Fall 2008	$17,642	-	237358	00381100
Information Science/Studies	Bachelors	Delaware State University	1200 N. Dupont Highway, Dover, Delaware 19901	www.desu.edu	4-year, Public	Bachelor's degree;Master's degree;Doctor's degree - research/scholarship	City: Small	Yes	4397	4012	43%	NA	Fall 2008	$12,603	-	130934	00142800
Information Science/Studies	Bachelors	DePaul University	1 E Jackson Blvd, Chicago, Illinois 60604	www.depaul.edu	4-year, Private not-for-profit	Less than one year certificate;One but less than two years certificate;Bachelor's degree;Master's degree;Post-master's certificate;Doctor's degree - research/scholarship;Doctor's degree - professional practice	City: Large	Yes	23799	16153	71%	NA	Fall 2008	$29,756	-	144740	00167100
Information Science/Studies	Bachelors	Doane College-Crete	1014 Boswell Avenue, Crete, Nebraska 68333	www.doane.edu	4-year, Private not-for-profit	Bachelor's degree	Town: Distant	Yes	1065	1065	59%	NA	Fall 2008	$21,786	-	181020	00254400
Information Science/Studies	Bachelors	Dominican University	7900 W Division Street, River Forest, Illinois 60305	www.dom.edu/	4-year, Private not-for-profit	One but less than two years certificate;Bachelor's degree;Postbaccalaureate certificate;Master's degree;Post-master's certificate;Doctor's degree - research/scholarship	Suburb: Large	Yes	3498	2180	63%	32%	Fall 2008	$16,505	-	148496	00175000
Information Science/Studies	Bachelors	Dordt College	498 4th Ave NE, Sioux Center, Iowa 51250-1697	www.dordt.edu	4-year, Private not-for-profit	Associate's degree;Bachelor's degree;Master's degree	Town: Remote	Yes	1459	1399	66%	NA	Fall 2008	$24,187	-	153250	00185900
Information Science/Studies	Bachelors	Drexel University	3141 Chestnut St, Philadelphia, Pennsylvania 19104	www.drexel.edu	4-year, Private not-for-profit	Less than one year certificate;One but less than two years certificate;Associate's degree;Bachelor's degree;Postbaccalaureate certificate;Master's degree;Post-master's certificate;Doctor's degree - research/scholarship;Doctor's degree - professional practice;Doctor's degree - other	City: Large	Yes	26359	16896	67%	24%	Fall 2008	$37,244	-	212054	00325600
Information Science/Studies	Bachelors	East Carolina University	East 5th Street, Greenville, North Carolina 27858-4353	www.ecu.edu	4-year, Public	Bachelor's degree;Postbaccalaureate certificate;Master's degree;Post-master's certificate;Doctor's degree - research/scholarship;Doctor's degree - professional practice	City: Small	Yes	27511	22252	59%	17%	Fall 2008	$12,908	-	198464	00292300
Information Science/Studies	Bachelors	Eastern Connecticut State University	83 Windham St, Willimantic, Connecticut 06226	www.easternct.edu/	4-year, Public	Associate's degree;Bachelor's degree;Master's degree	Town: Fringe	Yes	5287	5139	56%	NA	Fall 2008	$16,050	-	129215	00142500
Information Science/Studies	Bachelors	Elizabethtown College	One Alpha Drive, Elizabethtown, Pennsylvania 17022-2298	www.etown.edu	4-year, Private not-for-profit	Bachelor's degree;Master's degree	Suburb: Large	Yes	1822	1788	69%	NA	Fall 2008	$27,681	-	212197	00326200
Information Science/Studies	Bachelors	Elizabethtown College School of Continuing and Professional Studies	One Alpha Drive, Elizabethtown, Pennsylvania 17022	www.etowndegrees.com/	4-year, Private not-for-profit	Associate's degree;Bachelor's degree;Postbaccalaureate certificate;Master's degree	Suburb: Large	No	422	346	NA	NA	Fall 2008	NA	-	480134	00326200
Information Science/Studies	Bachelors	Elmhurst College	190 Prospect Ave, Elmhurst, Illinois 60126-3096	public.elmhurst.edu	4-year, Private not-for-profit	Bachelor's degree;Master's degree	Suburb: Large	Yes	3257	2853	74%	NA	Fall 2008	$21,826	-	144962	00167600
Information Science/Studies	Bachelors	Elon University	100 Campus Drive, Elon, North Carolina 27244-2010	www.elon.edu	4-year, Private not-for-profit	Bachelor's degree;Master's degree;Doctor's degree - professional practice	Suburb: Midsize	Yes	6483	5782	81%	NA	Fall 2008	$32,205	-	198516	00292700
Information Science/Studies	Bachelors	Emporia State University	1 Kellogg Circle, Emporia, Kansas 66801-5415	www.emporia.edu	4-year, Public	Bachelor's degree;Postbaccalaureate certificate;Master's degree;Post-master's certificate;Doctor's degree - research/scholarship	Town: Remote	Yes	6114	3924	39%	39%	Fall 2008	$12,034	-	155025	00192700
Information Science/Studies	Bachelors	Excelsior College	7 Columbia Cir, Albany, New York 12203-5159	www.excelsior.edu	4-year, Private not-for-profit	Less than one year certificate;Associate's degree;Bachelor's degree;Postbaccalaureate certificate;Master's degree;Post-master's certificate	City: Small	No	41527	38426	NA	NA	Fall 2008	NA	-	196680	00283400
Information Science/Studies	Bachelors	Fairmont State University	1201 Locust Ave, Fairmont, West Virginia 26554-2470	www.fairmontstate.edu/	4-year, Public	Associate's degree;Bachelor's degree;Master's degree	Town: Distant	Yes	4035	3797	33%	34%	Fall 2008	$8,717	-	237367	00381200
Information Science/Studies	Bachelors	Florida Institute of Technology-Online	150 West University Blvd, Melbourne, Florida 32901	www.fit.edu	4-year, Private not-for-profit	Associate's degree;Bachelor's degree;Master's degree	City: Small	No	3182	2066	NA	NA	Fall 2008	NA	-	480569	00146900
Information Science/Studies	Bachelors	Fordham University	441 E Fordham Rd, Bronx, New York 10458	www.fordham.edu	4-year, Private not-for-profit	Bachelor's degree;Postbaccalaureate certificate;Master's degree;Post-master's certificate;Doctor's degree - research/scholarship;Doctor's degree - professional practice	City: Large	Yes	15231	8633	80%	NA	Fall 2008	$35,605	-	191241	00272200
Information Science/Studies	Bachelors	Fort Hays State University	600 Park St, Hays, Kansas 67601-4099	www.fhsu.edu	4-year, Public	Associate's degree;Bachelor's degree;Master's degree;Post-master's certificate	Town: Remote	Yes	13825	11643	43%	28%	Fall 2008	$11,698	-	155061	00191500
Information Science/Studies	Bachelors	Fort Valley State University	1005 State University Dr, Fort Valley, Georgia 31030-4313	www.fvsu.edu	4-year, Public	Bachelor's degree;Master's degree;Post-master's certificate	Town: Fringe	Yes	2594	2231	32%	22%	Fall 2008	$14,122	-	139719	00156600
Information Science/Studies	Bachelors	Friends University	2100 W. University Ave., Wichita, Kansas 67213	www.friends.edu	4-year, Private not-for-profit	Associate's degree;Bachelor's degree;Master's degree	City: Large	Yes	1882	1344	34%	NA	Fall 2008	$19,982	-	155089	00191800
Information Science/Studies	Bachelors	Frostburg State University	101 Braddock Road, Frostburg, Maryland 21532-1099	www.frostburg.edu	4-year, Public	Less than one year certificate;One but less than two years certificate;Bachelor's degree;Master's degree;Doctor's degree - research/scholarship	Suburb: Small	Yes	5645	4915	49%	30%	Fall 2008	$12,952	-	162584	00207200
Information Science/Studies	Bachelors	Furman University	3300 Poinsett Highway, Greenville, South Carolina 29613-6162	www.furman.edu	4-year, Private not-for-profit	Bachelor's degree;Master's degree;Post-master's certificate	Suburb: Large	Yes	2973	2810	84%	9%	Fall 2008	$30,607	-	218070	00343400
Information Science/Studies	Bachelors	Gallaudet University	800 Florida Ave, NE, Washington, District of Columbia 20002-3695	www.gallaudet.edu	4-year, Private not-for-profit	One but less than two years certificate;Bachelor's degree;Postbaccalaureate certificate;Master's degree;Post-master's certificate;Doctor's degree - research/scholarship;Doctor's degree - other	City: Large	Yes	1488	1031	46%	15%	Fall 2008	$14,080	-	131450	00144300
Information Science/Studies	Bachelors	George Fox University	414 N Meridian St, Newberg, Oregon 97132	www.georgefox.edu	4-year, Private not-for-profit	Bachelor's degree;Postbaccalaureate certificate;Master's degree;Post-master's certificate;Doctor's degree - professional practice	Town: Fringe	Yes	3786	2509	65%	NA	Fall 2008	$25,359	-	208822	00319400
Information Science/Studies	Bachelors	George Washington University	2121 I Street, NW, Washington, District of Columbia 20052	www.gwu.edu	4-year, Private not-for-profit	One but less than two years certificate;Associate's degree;Bachelor's degree;Postbaccalaureate certificate;Master's degree;Post-master's certificate;Doctor's degree - research/scholarship;Doctor's degree - professional practice	City: Large	Yes	25613	10740	79%	NA	Fall 2008	$32,826	-	131469	00144400
Information Science/Studies	Bachelors	Georgia Southern University	Brannen Hall, Room 2015, 2670 Southern Drive, Statesboro, Georgia 30460-8126	www.georgiasouthern.edu	4-year, Public	Bachelor's degree;Postbaccalaureate certificate;Master's degree;Post-master's certificate;Doctor's degree - research/scholarship	Town: Distant	Yes	20517	18004	51%	34%	Fall 2008	$16,032	-	139931	00157200
Information Science/Studies	Bachelors	Globe Institute of Technology	500 7th Ave, New York, New York 10018	www.globe.edu/index.asp	4-year, primarily associate's, Private for-profit	One but less than two years certificate;Associate's degree;Bachelor's degree	City: Large	No	490	490	24%	26%	Fall 2008	$21,459	-	188465	02540800
Information Science/Studies	Bachelors	Golden Gate University-San Francisco	536 Mission Street, San Francisco, California 94105-2968	www.ggu.edu	4-year, Private not-for-profit	Less than one year certificate;Bachelor's degree;Postbaccalaureate certificate;Master's degree;Post-master's certificate;Doctor's degree - research/scholarship;Doctor's degree - professional practice	City: Large	No	2909	489	NA	NA	Fall 2008	NA	-	115083	00120500
Information Science/Studies	Bachelors	Grambling State University	403 Main Street, Grambling, Louisiana 71245	www.gram.edu	4-year, Public	Bachelor's degree;Master's degree;Post-master's certificate;Doctor's degree - research/scholarship	Town: Distant	Yes	4504	3524	30%	NA	Fall 2008	$17,202	-	159009	00200600
Information Science/Studies	Bachelors	Grand Valley State University	1 Campus Dr, Allendale, Michigan 49401-9403	www.gvsu.edu	4-year, Public	Bachelor's degree;Postbaccalaureate certificate;Master's degree;Post-master's certificate;Doctor's degree - professional practice	Suburb: Large	Yes	25094	21636	65%	13%	Fall 2008	$16,370	-	170082	00226800
Information Science/Studies	Bachelors	Grantham University	16025 West 113th Street, Lenexa, Kansas 66219	www.grantham.edu/	4-year, Private for-profit	Less than one year certificate;Associate's degree;Bachelor's degree;Master's degree	Suburb: Large	No	12577	10878	NA	NA	Fall 2008	$12,808	-	442569	04122300
Information Science/Studies	Bachelors	Guilford College	5800 W Friendly Avenue, Greensboro, North Carolina 27410-4108	www.guilford.edu	4-year, Private not-for-profit	Less than one year certificate;Bachelor's degree	City: Large	Yes	2137	2137	61%	NA	Fall 2008	$25,738	-	198613	00293100
Information Science/Studies	Bachelors	Hampton University	E Queen Street, Hampton, Virginia 23668-0099	www.hamptonu.edu	4-year, Private not-for-profit	One but less than two years certificate;Associate's degree;Two but less than 4 years certificate;Bachelor's degree;Master's degree;Post-master's certificate;Doctor's degree - research/scholarship;Doctor's degree - professional practice	City: Midsize	Yes	4393	3503	66%	11%	Fall 2008	$22,529	-	232265	00371400
Information Science/Studies	Bachelors	Hartwick College	One Hartwick Drive, Oneonta, New York 13820-4020	www.hartwick.edu/	4-year, Private not-for-profit	Bachelor's degree	Town: Remote	Yes	1540	1540	57%	25%	Fall 2008	$24,577	-	191533	00272900
Information Science/Studies	Bachelors	Hiram College	Hinsdale Hall Third Floor, Hiram, Ohio 44234-0067	WWW.HIRAM.EDU	4-year, Private not-for-profit	Bachelor's degree;Master's degree	Town: Fringe	Yes	1259	1235	63%	NA	Fall 2008	$22,194	-	203128	00304900
Information Science/Studies	Bachelors	Howard University	2400 Sixth St NW, Washington, District of Columbia 20059-0001	www.howard.edu	4-year, Private not-for-profit	Two but less than 4 years certificate;Bachelor's degree;Postbaccalaureate certificate;Master's degree;Post-master's certificate;Doctor's degree - research/scholarship;Doctor's degree - professional practice	City: Large	Yes	10265	7013	60%	NA	Fall 2008	$22,337	-	131520	00144800
Information Science/Studies	Bachelors	Idaho State University	921 S 8th Ave, Pocatello, Idaho 83209	www.isu.edu/	4-year, Public	Less than one year certificate;One but less than two years certificate;Associate's degree;Two but less than 4 years certificate;Bachelor's degree;Postbaccalaureate certificate;Master's degree;Post-master's certificate;Doctor's degree - research/scholarship;Doctor's degree - professional practice	City: Small	Yes	13429	11517	33%	23%	Fall 2008	$13,695	-	142276	00162000
Information Science/Studies	Bachelors	Immaculata University	1145 King Rd, Immaculata, Pennsylvania 19345-0702	www.immaculata.edu	4-year, Private not-for-profit	Associate's degree;Bachelor's degree;Master's degree;Doctor's degree - research/scholarship;Doctor's degree - professional practice	Suburb: Large	Yes	3299	2138	61%	33%	Fall 2008	$30,947	-	213011	00327600
Information Science/Studies	Bachelors	James Madison University	800 South Main Street, Harrisonburg, Virginia 22807	www.jmu.edu/	4-year, Public	Less than one year certificate;Bachelor's degree;Postbaccalaureate certificate;Master's degree;Post-master's certificate;Doctor's degree - research/scholarship;Doctor's degree - professional practice	City: Small	Yes	20855	19144	82%	NA	Fall 2008	$14,772	-	232423	00372100
Information Science/Studies	Bachelors	Johns Hopkins University	3400 N Charles St, Mason Hall, Baltimore, Maryland 21218-2688	www.jhu.edu	4-year, Private not-for-profit	Two but less than 4 years certificate;Bachelor's degree;Postbaccalaureate certificate;Master's degree;Post-master's certificate;Doctor's degree - research/scholarship;Doctor's degree - professional practice	City: Large	Yes	21372	6357	93%	2%	Fall 2008	$25,207	-	162928	00207700
Information Science/Studies	Bachelors	Johnson & Wales University-Providence	8 Abbott Park Place, Providence, Rhode Island 02903-3703	www.jwu.edu	4-year, Private not-for-profit	One but less than two years certificate;Associate's degree;Bachelor's degree;Master's degree;Post-master's certificate;Doctor's degree - research/scholarship	City: Midsize	Yes	9955	9173	57%	1%	Fall 2008	$25,972	-	217235	00340400
Information Science/Studies	Bachelors	Kansas State University	Anderson Hall, Manhattan, Kansas 66506	www.k-state.edu	4-year, Public	Associate's degree;Bachelor's degree;Postbaccalaureate certificate;Master's degree;Doctor's degree - research/scholarship;Doctor's degree - professional practice	City: Small	Yes	24766	20327	59%	26%	Fall 2008	$15,784	-	155399	00192800
Information Science/Studies	Bachelors	Kennesaw State University	1000 Chastain Rd, Kennesaw, Georgia 30144-5591	www.kennesaw.edu	4-year, Public	Less than one year certificate;One but less than two years certificate;Bachelor's degree;Postbaccalaureate certificate;Master's degree;Post-master's certificate;Doctor's degree - research/scholarship	Suburb: Large	Yes	25714	23592	43%	21%	Fall 2008	$16,232	-	140164	00157700
Information Science/Studies	Bachelors	Lehigh University	27 Memorial Drive West, Bethlehem, Pennsylvania 18015	www.lehigh.edu	4-year, Private not-for-profit	Bachelor's degree;Master's degree;Post-master's certificate;Doctor's degree - research/scholarship	City: Small	Yes	7119	5062	87%	NA	Fall 2008	$27,848	-	213543	00328900
Information Science/Studies	Bachelors	Lenoir-Rhyne University	625 7th Avenue NE, Hickory, North Carolina 28601	www.lr.edu	4-year, Private not-for-profit	Bachelor's degree;Postbaccalaureate certificate;Master's degree	City: Small	Yes	2050	1524	54%	NA	Fall 2008	$19,369	-	198835	00294100
Information Science/Studies	Bachelors	LeTourneau University	2100 S Mobberly Ave, Longview, Texas 75607-7001	www.letu.edu	4-year, Private not-for-profit	Associate's degree;Bachelor's degree;Master's degree	City: Small	Yes	2667	2250	51%	NA	Fall 2008	$21,434	-	226231	00358400
Information Science/Studies	Bachelors	Lewis University	One University Parkway, Romeoville, Illinois 60446-2200	www.lewisu.edu	4-year, Private not-for-profit	One but less than two years certificate;Associate's degree;Bachelor's degree;Postbaccalaureate certificate;Master's degree;Post-master's certificate;Doctor's degree - research/scholarship;Doctor's degree - other	Suburb: Large	Yes	6689	4752	62%	NA	Fall 2008	$18,768	-	146612	00170700
Information Science/Studies	Bachelors	Lewis-Clark State College	500 8th Ave, Lewiston, Idaho 83501-2698	www.lcsc.edu	4-year, Public	Less than one year certificate;One but less than two years certificate;Associate's degree;Two but less than 4 years certificate;Bachelor's degree	City: Small	Yes	4304	4304	27%	30%	Fall 2008	$12,400	-	142328	00162100
Information Science/Studies	Bachelors	Lincoln University	820 Chestnut Street, Jefferson City, Missouri 65101	www.lincolnu.edu/	4-year, Public	Associate's degree;Bachelor's degree;Master's degree;Post-master's certificate	City: Small	Yes	3117	2977	25%	NA	Fall 2008	$9,528	-	177940	00247900
Information Science/Studies	Bachelors	LIU Post	720 Northern Blvd, Brookville, New York 11548-1327	liu.edu/CWPost	4-year, Private not-for-profit	One but less than two years certificate;Associate's degree;Bachelor's degree;Postbaccalaureate certificate;Master's degree;Post-master's certificate;Doctor's degree - research/scholarship	Suburb: Large	Yes	9486	7117	41%	46%	Fall 2008	$29,039	-	192448	00275100
Information Science/Studies	Bachelors	Mary Baldwin College	New & Frederick St, Staunton, Virginia 24401	www.mbc.edu	4-year, Private not-for-profit	Bachelor's degree;Master's degree;Doctor's degree - professional practice	City: Small	Yes	1754	1423	43%	NA	Fall 2008	$18,728	-	232672	00372300
Information Science/Studies	Bachelors	McKendree University	701 College Rd, Lebanon, Illinois 62254-1291	www.mckendree.edu/prospective/admissions/index.aspx	4-year, Private not-for-profit	Associate's degree;Bachelor's degree;Master's degree;Post-master's certificate;Doctor's degree - research/scholarship	Suburb: Large	Yes	3131	2521	56%	NA	Fall 2008	$17,572	-	147013	00172200
Information Science/Studies	Bachelors	Medaille College	18 Agassiz Circle, Buffalo, New York 14214-2695	www.medaille.edu	4-year, Private not-for-profit	Less than one year certificate;Associate's degree;Bachelor's degree;Master's degree;Post-master's certificate;Doctor's degree - professional practice	City: Large	Yes	2479	1914	44%	NA	Fall 2008	$9,698	-	192925	00277700
Information Science/Studies	Bachelors	Mercer University	1400 Coleman Avenue, Macon, Georgia 31207	www.mercer.edu	4-year, Private not-for-profit	Bachelor's degree;Master's degree;Post-master's certificate;Doctor's degree - research/scholarship;Doctor's degree - professional practice;Doctor's degree - other	City: Midsize	Yes	8552	4570	63%	NA	Fall 2008	$20,054	-	140447	00158000
Information Science/Studies	Bachelors	Mercy College	555 Broadway, Dobbs Ferry, New York 10522	www.mercy.edu	4-year, Private not-for-profit	Less than one year certificate;One but less than two years certificate;Associate's degree;Bachelor's degree;Postbaccalaureate certificate;Master's degree;Doctor's degree - professional practice	Suburb: Large	Yes	11272	7939	29%	3%	Fall 2008	$14,990	-	193016	00277200
Information Science/Studies	Bachelors	Messiah College	One College Ave, Mechanicsburg, Pennsylvania 17055	www.messiah.edu	4-year, Private not-for-profit	Bachelor's degree;Postbaccalaureate certificate;Master's degree;Post-master's certificate	Suburb: Large	Yes	3234	2789	80%	NA	Fall 2008	$26,106	-	213996	00329800
Information Science/Studies	Bachelors	Metropolitan State University	700 East Seventh Street, Saint Paul, Minnesota 55106-5000	www.metrostate.edu	4-year, Public	Less than one year certificate;One but less than two years certificate;Bachelor's degree;Postbaccalaureate certificate;Master's degree;Post-master's certificate;Doctor's degree - research/scholarship	City: Large	No	8355	7595	34%	37%	Fall 2008	$13,654	-	174020	01037400
Information Science/Studies	Bachelors	Michigan State University	East Lansing, Michigan 48824-1046	www.msu.edu	4-year, Public	One but less than two years certificate;Bachelor's degree;Master's degree;Post-master's certificate;Doctor's degree - research/scholarship;Doctor's degree - professional practice	City: Small	Yes	50081	38786	79%	13%	Fall 2008	$14,791	-	171100	00229000
Information Science/Studies	Bachelors	Midstate College	411 W Northmoor Road, Peoria, Illinois 61614-3595	www.midstate.edu	4-year, primarily associate's, Private for-profit	One but less than two years certificate;Associate's degree;Bachelor's degree	City: Midsize	No	521	521	39%	NA	Fall 2008	$17,385	-	147165	00456800
Information Science/Studies	Bachelors	Minnesota State University Moorhead	1104 Seventh Avenue South, Moorhead, Minnesota 56563	www.mnstate.edu	4-year, Public	Less than one year certificate;One but less than two years certificate;Associate's degree;Bachelor's degree;Postbaccalaureate certificate;Master's degree;Post-master's certificate;Doctor's degree - research/scholarship	Suburb: Midsize	Yes	6306	5731	42%	33%	Fall 2008	$14,349	-	174358	00236700
Information Science/Studies	Bachelors	Minot State University	500 University Ave W, Minot, North Dakota 58707	www.minotstateu.edu	4-year, Public	Less than one year certificate;Associate's degree;Bachelor's degree;Master's degree;Post-master's certificate	Town: Remote	Yes	3410	3116	40%	NA	Fall 2008	$11,047	-	200253	00299400
Information Science/Studies	Bachelors	Missouri University of Science and Technology	1870 Miner Circle, Rolla, Missouri 65409	www.mst.edu/	4-year, Public	One but less than two years certificate;Bachelor's degree;Postbaccalaureate certificate;Master's degree;Doctor's degree - research/scholarship	Town: Remote	Yes	8640	6520	63%	NA	Fall 2008	$14,377	-	178411	00251700
Information Science/Studies	Bachelors	Molloy College	1000 Hempstead Ave, Rockville Centre, New York 11571-5002	www.molloy.edu	4-year, Private not-for-profit	Associate's degree;Bachelor's degree;Master's degree;Post-master's certificate;Doctor's degree - research/scholarship	Suburb: Large	Yes	4497	3336	70%	NA	Fall 2008	$23,383	-	193292	00277500
Information Science/Studies	Bachelors	Montana State University-Northern	300 W 11th St, Havre, Montana 59501	www.msun.edu	4-year, Public	One but less than two years certificate;Associate's degree;Bachelor's degree;Master's degree	Town: Remote	Yes	1230	1148	26%	NA	Fall 2008	$11,513	-	180522	00253300
Information Science/Studies	Bachelors	Morgan State University	1700 East Cold Spring Lane, Baltimore, Maryland 21251-0001	www.morgan.edu	4-year, Public	Bachelor's degree;Postbaccalaureate certificate;Master's degree;Doctor's degree - research/scholarship	City: Large	Yes	7698	6302	32%	18%	Fall 2008	$14,654	-	163453	00208300
Information Science/Studies	Bachelors	Muhlenberg College	2400 Chew Street, Allentown, Pennsylvania 18104	www.muhlenberg.edu	4-year, Private not-for-profit	Less than one year certificate;One but less than two years certificate;Associate's degree;Two but less than 4 years certificate;Bachelor's degree	City: Midsize	Yes	2440	2440	86%	NA	Fall 2008	$35,610	-	214175	00330400
Information Science/Studies	Bachelors	Murray State University	218 Wells Hall, Murray, Kentucky 42071-3318	www.murraystate.edu	4-year, Public	Less than one year certificate;Associate's degree;Bachelor's degree;Postbaccalaureate certificate;Master's degree;Post-master's certificate;Doctor's degree - research/scholarship;Doctor's degree - professional practice	Town: Remote	Yes	11207	9444	52%	NA	Fall 2008	$9,970	-	157401	00197700
Information Science/Studies	Bachelors	National Louis University	122 S Michigan Ave, Chicago, Illinois 60603	www.nl.edu	4-year, Private not-for-profit	Bachelor's degree;Postbaccalaureate certificate;Master's degree;Post-master's certificate;Doctor's degree - research/scholarship	City: Large	No	4582	1341	25%	NA	Fall 2008	$15,420	-	147536	00173300
Information Science/Studies	Bachelors	Nazareth College	4245 East Ave, Rochester, New York 14618-3790	www.naz.edu	4-year, Private not-for-profit	Bachelor's degree;Master's degree;Doctor's degree - professional practice	Suburb: Large	Yes	2818	2057	76%	20%	Fall 2008	$26,802	-	193584	00277900
Information Science/Studies	Bachelors	Nebraska Wesleyan University	5000 St Paul Ave, Lincoln, Nebraska 68504-2794	www.nebrwesleyan.edu/	4-year, Private not-for-profit	Less than one year certificate;Bachelor's degree;Postbaccalaureate certificate;Master's degree;Post-master's certificate	City: Large	Yes	2083	1832	69%	NA	Fall 2008	$20,987	-	181446	00255500
Information Science/Studies	Bachelors	New Jersey Institute of Technology	University Heights, Newark, New Jersey 07102	www.njit.edu/	4-year, Public	Bachelor's degree;Postbaccalaureate certificate;Master's degree;Doctor's degree - research/scholarship	City: Large	Yes	10646	7550	59%	NA	Fall 2008	$14,875	-	185828	00262100
Information Science/Studies	Bachelors	New Mexico Highlands University	University Ave, Las Vegas, New Mexico 87701	www.nmhu.edu	4-year, Public	Associate's degree;Bachelor's degree;Postbaccalaureate certificate;Master's degree	Town: Remote	Yes	3546	2275	17%	46%	Fall 2008	$10,241	-	187897	00265300
Information Science/Studies	Bachelors	Newman University	3100 McCormick Ave, Wichita, Kansas 67213-2097	www.newmanu.edu	4-year, Private not-for-profit	Associate's degree;Bachelor's degree;Master's degree	City: Large	Yes	3687	2732	48%	NA	Fall 2008	$14,178	-	155335	00193900
Information Science/Studies	Bachelors	North Carolina Central University	1801 Fayetteville Street, Durham, North Carolina 27707	www.nccu.edu	4-year, Public	Bachelor's degree;Postbaccalaureate certificate;Master's degree;Doctor's degree - research/scholarship;Doctor's degree - professional practice	City: Midsize	Yes	7687	5917	47%	19%	Fall 2008	$9,701	-	199157	00295000
Information Science/Studies	Bachelors	Northeastern University	360 Huntington Ave, Boston, Massachusetts 02115-5005	www.northeastern.edu	4-year, Private not-for-profit	Bachelor's degree;Master's degree;Post-master's certificate;Doctor's degree - research/scholarship;Doctor's degree - professional practice;Doctor's degree - other	City: Large	Yes	19798	13510	82%	NA	Fall 2008	$30,546	-	167358	00219900
Information Science/Studies	Bachelors	Northern Kentucky University	Nunn Drive, Highland Heights, Kentucky 41099	www.nku.edu	4-year, Public	Less than one year certificate;One but less than two years certificate;Associate's degree;Two but less than 4 years certificate;Bachelor's degree;Postbaccalaureate certificate;Master's degree;Post-master's certificate;Doctor's degree - research/scholarship;Doctor's degree - professional practice	Suburb: Large	Yes	15090	12809	36%	NA	Fall 2008	$8,298	-	157447	00927500
Information Science/Studies	Bachelors	Northwestern College	101 Seventh St SW, Orange City, Iowa 51041	www.nwciowa.edu/	4-year, Private not-for-profit	Less than one year certificate;Bachelor's degree	Town: Distant	Yes	1205	1205	63%	NA	Fall 2008	$21,390	-	154101	00188300
Information Science/Studies	Bachelors	Northwestern State University of Louisiana	University Parkway, Natchitoches, Louisiana 71497-0002	www.nsula.edu/	4-year, Public	Associate's degree;Bachelor's degree;Postbaccalaureate certificate;Master's degree;Post-master's certificate;Doctor's degree - professional practice	Town: Remote	Yes	9002	7898	38%	NA	Fall 2008	$9,488	-	160038	00202100
Information Science/Studies	Bachelors	Northwestern University	633 Clark St, Evanston, Illinois 60208	www.northwestern.edu	4-year, Private not-for-profit	One but less than two years certificate;Bachelor's degree;Postbaccalaureate certificate;Master's degree;Post-master's certificate;Doctor's degree - research/scholarship;Doctor's degree - professional practice	City: Small	Yes	21554	9048	93%	NA	Fall 2008	$28,667	-	147767	00173900
Information Science/Studies	Bachelors	Norwich University	158 Harmon Drive, Northfield, Vermont 05663-1035	www.norwich.edu	4-year, Private not-for-profit	Bachelor's degree;Master's degree	Town: Distant	Yes	3672	2648	58%	NA	Fall 2008	$27,429	-	230995	00369200
Information Science/Studies	Bachelors	Notre Dame of Maryland University	4701 N Charles St, Baltimore, Maryland 21210-2476	www.ndm.edu	4-year, Private not-for-profit	Two but less than 4 years certificate;Bachelor's degree;Postbaccalaureate certificate;Master's degree;Post-master's certificate;Doctor's degree - research/scholarship;Doctor's degree - professional practice	City: Large	Yes	2764	1169	58%	NA	Fall 2008	$18,370	-	163578	00206500
Information Science/Studies	Bachelors	Ohio Dominican University	1216 Sunbury Road, Columbus, Ohio 43219	www.ohiodominican.edu	4-year, Private not-for-profit	Less than one year certificate;One but less than two years certificate;Associate's degree;Bachelor's degree;Master's degree	City: Large	Yes	2707	1865	43%	NA	Fall 2008	$20,491	-	204617	00303500
Information Science/Studies	Bachelors	Oklahoma Baptist University	500 W University, Shawnee, Oklahoma 74804	www.okbu.edu	4-year, Private not-for-profit	One but less than two years certificate;Associate's degree;Bachelor's degree;Master's degree	Town: Distant	Yes	1979	1921	51%	NA	Fall 2008	$17,441	-	207403	00316400
Information Science/Studies	Bachelors	Oklahoma Christian University	2501 E Memorial Rd, Edmond, Oklahoma 73013-1100	www.oc.edu	4-year, Private not-for-profit	Bachelor's degree;Master's degree	City: Large	Yes	2475	1968	47%	18%	Fall 2008	$19,046	-	207324	00316500
Information Science/Studies	Bachelors	Oklahoma Wesleyan University	2201 Silver Lake Rd, Bartlesville, Oklahoma 74006-6299	www.okwu.edu	4-year, Private not-for-profit	Associate's degree;Bachelor's degree;Master's degree	Town: Distant	Yes	1345	1205	37%	NA	Fall 2008	$21,742	-	206835	00315100
Information Science/Studies	Bachelors	Olivet Nazarene University	One University Avenue, Bourbonnais, Illinois 60914-2271	www.olivet.edu	4-year, Private not-for-profit	Associate's degree;Bachelor's degree;Master's degree;Doctor's degree - research/scholarship	Suburb: Small	Yes	4861	3521	56%	NA	Fall 2008	$19,112	-	147828	00174100
Information Science/Studies	Bachelors	Pace University-New York	1 Pace Plaza, New York, New York 10038-1598	www.pace.edu	4-year, Private not-for-profit	Less than one year certificate;Associate's degree;Bachelor's degree;Postbaccalaureate certificate;Master's degree;Post-master's certificate;Doctor's degree - research/scholarship;Doctor's degree - professional practice	City: Large	Yes	12857	8694	55%	NA	Fall 2008	$29,641	-	194310	00279100
Information Science/Studies	Bachelors	Park University	8700 NW River Park Dr, Parkville, Missouri 64152-3795	www.park.edu	4-year, Private not-for-profit	Less than one year certificate;One but less than two years certificate;Associate's degree;Bachelor's degree;Postbaccalaureate certificate;Master's degree	Suburb: Large	Yes	10792	9892	42%	NA	Fall 2008	$9,326	-	178721	00249800
Information Science/Studies	Bachelors	Pennsylvania State University-Main Campus	201 Old Main, University Park, Pennsylvania 16802	www.psu.edu/	4-year, Public	Less than one year certificate;One but less than two years certificate;Associate's degree;Bachelor's degree;Postbaccalaureate certificate;Master's degree;Doctor's degree - research/scholarship;Doctor's degree - professional practice	City: Small	Yes	47040	40541	86%	NA	Fall 2008	$24,220	-	214777	00332900
Information Science/Studies	Bachelors	Pennsylvania State University-Penn State Abington	1600 Woodland Road, Abington, Pennsylvania 19001	www.abington.psu.edu/	4-year, Public	Less than one year certificate;One but less than two years certificate;Associate's degree;Bachelor's degree;Postbaccalaureate certificate	Suburb: Large	No	3952	3947	47%	NA	Fall 2008	$10,920	-	214801	00332913
Information Science/Studies	Bachelors	Pennsylvania State University-Penn State Beaver	100 University Drive, Monaca, Pennsylvania 15061	www.beaver.psu.edu/	4-year, Public	Less than one year certificate;One but less than two years certificate;Bachelor's degree;Postbaccalaureate certificate	Suburb: Large	Yes	720	720	41%	NA	Fall 2008	$16,583	-	214698	00332904
Information Science/Studies	Bachelors	Pennsylvania State University-Penn State Berks	Tulpehocken Road, Reading, Pennsylvania 19610	www.berks.psu.edu/	4-year, Public	Less than one year certificate;One but less than two years certificate;Associate's degree;Bachelor's degree	Suburb: Large	Yes	2839	2828	57%	NA	Fall 2008	$20,466	-	214704	00332906
Information Science/Studies	Bachelors	Pennsylvania State University-Penn State Brandywine	25 Yearsley Mill Road, Media, Pennsylvania 19063	www.brandywine.psu.edu/	4-year, Public	Less than one year certificate;One but less than two years certificate;Associate's degree;Bachelor's degree	Suburb: Large	No	1488	1488	43%	NA	Fall 2008	$12,910	-	214731	00332921
Information Science/Studies	Bachelors	Pennsylvania State University-Penn State DuBois	1 College Place, DuBois, Pennsylvania 15801	www.dubois.psu.edu/	4-year, primarily associate's, Public	Less than one year certificate;One but less than two years certificate;Associate's degree;Bachelor's degree	Town: Remote	No	615	615	52%	NA	Fall 2008	$14,338	-	214740	00332907
Information Science/Studies	Bachelors	Pennsylvania State University-Penn State Greater Allegheny	4000 University Drive, McKeesport, Pennsylvania 15132	ga.psu.edu	4-year, Public	Less than one year certificate;One but less than two years certificate;Associate's degree;Bachelor's degree;Master's degree	Suburb: Large	Yes	604	604	38%	NA	Fall 2008	$15,495	-	214786	00332910
Information Science/Studies	Bachelors	Pennsylvania State University-Penn State Harrisburg	777 West Harrisburg Pike, Middletown, Pennsylvania 17057	hbg.psu.edu/	4-year, Public	Less than one year certificate;One but less than two years certificate;Associate's degree;Bachelor's degree;Postbaccalaureate certificate;Master's degree;Doctor's degree - research/scholarship	Suburb: Large	Yes	4519	3691	67%	NA	Fall 2008	$19,546	-	214713	00332920
Information Science/Studies	Bachelors	Pennsylvania State University-Penn State Hazleton	76 University Drive, Hazleton, Pennsylvania 18202	hazleton.psu.edu/	4-year, primarily associate's, Public	Less than one year certificate;One but less than two years certificate;Associate's degree;Bachelor's degree	Suburb: Small	Yes	850	850	54%	NA	Fall 2008	$18,442	-	214768	00332909
Information Science/Studies	Bachelors	Pennsylvania State University-Penn State Lehigh Valley	2809 Saucon Valley Road, Center Valley, Pennsylvania 18034	www.lv.psu.edu/	4-year, Public	Less than one year certificate;One but less than two years certificate;Associate's degree;Bachelor's degree;Postbaccalaureate certificate	Suburb: Large	No	913	881	54%	NA	Fall 2008	$13,437	-	214670	00332902
Information Science/Studies	Bachelors	Pennsylvania State University-Penn State Mont Alto	1 Campus Drive, Mont Alto, Pennsylvania 17237	www.montalto.psu.edu/	4-year, primarily associate's, Public	Less than one year certificate;One but less than two years certificate;Associate's degree;Bachelor's degree	Town: Fringe	Yes	940	940	52%	NA	Fall 2008	$18,874	-	214795	00332911
Information Science/Studies	Bachelors	Pennsylvania State University-Penn State New Kensington	3550 Seventh Street Road, New Kensington, Pennsylvania 15068	nk.psu.edu/	4-year, Public	Less than one year certificate;One but less than two years certificate;Associate's degree;Bachelor's degree;Master's degree	Rural: Fringe	No	665	665	48%	NA	Fall 2008	$12,740	-	214625	00332912
Information Science/Studies	Bachelors	Pennsylvania State University-Penn State Schuylkill	200 University Drive, Schuylkill Haven, Pennsylvania 17972	www.sl.psu.edu	4-year, Public	Less than one year certificate;One but less than two years certificate;Associate's degree;Bachelor's degree	Town: Distant	Yes	796	796	43%	NA	Fall 2008	$15,232	-	214810	00332914
Information Science/Studies	Bachelors	Pennsylvania State University-Penn State Wilkes-Barre	Old Route 115, Lehman, Pennsylvania 18627	wb.psu.edu/	4-year, Public	Less than one year certificate;One but less than two years certificate;Associate's degree;Bachelor's degree;Postbaccalaureate certificate	Rural: Fringe	No	545	536	49%	NA	Fall 2008	$14,303	-	214643	00332917
Information Science/Studies	Bachelors	Pennsylvania State University-Penn State Worthington Scranton	120 Ridge View Drive, Dunmore, Pennsylvania 18512	worthingtonscranton.psu.edu/	4-year, Public	Less than one year certificate;One but less than two years certificate;Associate's degree;Bachelor's degree	Suburb: Large	No	1126	1126	46%	NA	Fall 2008	$12,453	-	214652	00332915
Information Science/Studies	Bachelors	Pennsylvania State University-Penn State York	1031 Edgecomb Avenue, York, Pennsylvania 17403	www.yk.psu.edu/	4-year, Public	Less than one year certificate;One but less than two years certificate;Associate's degree;Bachelor's degree;Master's degree	Suburb: Midsize	No	1172	1126	47%	NA	Fall 2008	$13,097	-	214829	00332918
Information Science/Studies	Bachelors	Pennsylvania State University-World Campus	128 Outreach Building, University Park, Pennsylvania 16802	www.worldcampus.psu.edu/	4-year, Public	Less than one year certificate;Associate's degree;Bachelor's degree;Postbaccalaureate certificate;Master's degree;Doctor's degree - professional practice	Rural: Fringe	No	10805	6245	25%	NA	Fall 2008	$22,017	-	479956	00332900
Information Science/Studies	Bachelors	Philadelphia University	4201 Henry Avenue, Philadelphia, Pennsylvania 19144-5497	www.philau.edu	4-year, Private not-for-profit	Associate's degree;Bachelor's degree;Postbaccalaureate certificate;Master's degree;Post-master's certificate;Doctor's degree - research/scholarship	City: Large	Yes	3762	2911	66%	28%	Fall 2008	$29,626	-	215099	00335400
Information Science/Studies	Bachelors	Quincy University	1800 College Ave, Quincy, Illinois 62301-2699	www.quincy.edu	4-year, Private not-for-profit	Associate's degree;Bachelor's degree;Master's degree	Town: Remote	Yes	1279	1097	49%	NA	Fall 2008	$16,701	-	148131	00174500
Information Science/Studies	Bachelors	Quinnipiac University	Mt Carmel Ave, Hamden, Connecticut 06518	www.quinnipiac.edu	4-year, Private not-for-profit	Bachelor's degree;Postbaccalaureate certificate;Master's degree;Post-master's certificate;Doctor's degree - professional practice	Suburb: Large	Yes	9035	6553	76%	NA	Fall 2008	$35,630	-	130226	00140200
Information Science/Studies	Bachelors	Radford University	801 East Main Street, Radford, Virginia 24142	www.radford.edu	4-year, Public	Less than one year certificate;Bachelor's degree;Postbaccalaureate certificate;Master's degree;Post-master's certificate;Doctor's degree	City: Small	Yes	9798	8885	59%	NA	Fall 2008	$13,875	-	233277	00373200
Information Science/Studies	Bachelors	Ramapo College of New Jersey	505 Ramapo Valley Rd, Mahwah, New Jersey 07430-1680	www.ramapo.edu	4-year, Public	Bachelor's degree;Master's degree	Suburb: Large	Yes	6003	5710	72%	NA	Fall 2008	$15,771	-	186201	00934400
Information Science/Studies	Bachelors	Roanoke College	221 College Lane, Salem, Virginia 24153-3794	www.roanoke.edu	4-year, Private not-for-profit	Bachelor's degree	Suburb: Midsize	Yes	2050	2050	64%	32%	Fall 2008	$29,077	-	233426	00373600
Information Science/Studies	Bachelors	Robert Morris University	6001 University Boulevard, Moon Township, Pennsylvania 15108-1189	www.rmu.edu	4-year, Private not-for-profit	Less than one year certificate;One but less than two years certificate;Bachelor's degree;Postbaccalaureate certificate;Master's degree;Doctor's degree - research/scholarship;Doctor's degree - professional practice	Suburb: Large	Yes	5555	4574	62%	26%	Fall 2008	$23,906	-	215655	00335900
Information Science/Studies	Bachelors	Roberts Wesleyan College	2301 Westside Dr, Rochester, New York 14624	WWW.Roberts.edu	4-year, Private not-for-profit	Associate's degree;Bachelor's degree;Master's degree	Suburb: Large	Yes	1762	1336	63%	NA	Fall 2008	$21,244	-	194958	00280500
Information Science/Studies	Bachelors	Rutgers University-New Brunswick	83 Somerset St, New Brunswick, New Jersey 08901-1281	www.rutgers.edu/	4-year, Public	One but less than two years certificate;Associate's degree;Bachelor's degree;Postbaccalaureate certificate;Master's degree;Post-master's certificate;Doctor's degree - research/scholarship;Doctor's degree - professional practice	City: Small	Yes	48378	34544	81%	11%	Fall 2008	$15,917	-	186380	00262900
Information Science/Studies	Bachelors	Rutgers University-Newark	249 University Avenue, Blumenthal Hall, Newark, New Jersey 07102	www.rutgers.edu	4-year, Public	One but less than two years certificate;Associate's degree;Bachelor's degree;Postbaccalaureate certificate;Master's degree;Post-master's certificate;Doctor's degree - research/scholarship;Doctor's degree - professional practice	City: Large	Yes	11314	7408	66%	18%	Fall 2008	$9,858	-	186399	00262902
Information Science/Studies	Bachelors	Saint Cloud State University	720 Fourth Ave. South, Saint Cloud, Minnesota 56301-4498	www.stcloudstate.edu	4-year, Public	Less than one year certificate;One but less than two years certificate;Associate's degree;Bachelor's degree;Postbaccalaureate certificate;Master's degree;Post-master's certificate;Doctor's degree - research/scholarship	City: Small	Yes	16076	14377	45%	36%	Fall 2008	$13,426	-	174783	00237700
Information Science/Studies	Bachelors	Saint Joseph's College-New York	245 Clinton Ave, Brooklyn, New York 11205-3688	www.sjcny.edu	4-year, Private not-for-profit	Less than one year certificate;Bachelor's degree;Master's degree	City: Large	No	4979	4138	68%	23%	Fall 2008	$15,635	-	195544	00282500
Information Science/Studies	Bachelors	Saint Joseph's University	5600 City Avenue, Philadelphia, Pennsylvania 19131-1395	www.sju.edu	4-year, Private not-for-profit	One but less than two years certificate;Associate's degree;Bachelor's degree;Postbaccalaureate certificate;Master's degree;Post-master's certificate;Doctor's degree - research/scholarship	City: Large	Yes	8974	5512	73%	NA	Fall 2008	$34,346	-	215770	00336700
Information Science/Studies	Bachelors	Saint Mary's University of Minnesota	700 Terrace Heights, Winona, Minnesota 55987-1399	www.smumn.edu	4-year, Private not-for-profit	Less than one year certificate;One but less than two years certificate;Bachelor's degree;Postbaccalaureate certificate;Master's degree;Post-master's certificate;Doctor's degree - research/scholarship;Doctor's degree - professional practice	Town: Distant	Yes	5825	1904	65%	NA	Fall 2008	$21,123	-	174817	00238000
Information Science/Studies	Bachelors	Saint Michael's College	One Winooski Park, Colchester, Vermont 05439	www.smcvt.edu	4-year, Private not-for-profit	Bachelor's degree;Postbaccalaureate certificate;Master's degree;Post-master's certificate	Suburb: Midsize	Yes	2618	2123	79%	NA	Fall 2008	$29,047	-	231059	00369400
Information Science/Studies	Bachelors	Salisbury University	1101 Camden Ave, Salisbury, Maryland 21801-6862	www.salisbury.edu	4-year, Public	Bachelor's degree;Postbaccalaureate certificate;Master's degree;Doctor's degree - research/scholarship;Doctor's degree - professional practice	Suburb: Small	Yes	8770	7997	66%	18%	Fall 2008	$16,683	-	163851	00209100
Information Science/Studies	Bachelors	San Diego State University	5500 Campanile Dr, San Diego, California 92182	www.sdsu.edu	4-year, Public	One but less than two years certificate;Bachelor's degree;Postbaccalaureate certificate;Master's degree;Doctor's degree	City: Large	Yes	33483	28394	66%	3%	Fall 2008	$10,085	-	122409	00115100
Information Science/Studies	Bachelors	Savannah State University	3219 College Street, Savannah, Georgia 31404-5310	www.savannahstate.edu/	4-year, Public	Associate's degree;Bachelor's degree;Master's degree	City: Midsize	Yes	4915	4769	28%	26%	Fall 2008	$9,894	-	140960	00159000
Information Science/Studies	Bachelors	Silver Lake College of the Holy Family	2406 S Alverno Rd, Manitowoc, Wisconsin 54220-9319	www.sl.edu/	4-year, Private not-for-profit	Bachelor's degree;Master's degree	Town: Distant	Yes	629	436	39%	NA	Fall 2008	$18,681	-	239743	00385000
Information Science/Studies	Bachelors	Sojourner-Douglass College	500 N Caroline St, Baltimore, Maryland 21205-1898	www.sdc.edu	4-year, Private not-for-profit	Less than one year certificate;One but less than two years certificate;Two but less than 4 years certificate;Bachelor's degree;Postbaccalaureate certificate;Master's degree	City: Large	No	705	659	25%	NA	Fall 2008	$19,554	-	163921	02127900
Information Science/Studies	Bachelors	South University-Columbia	9 Science Court, Columbia, South Carolina 29203	www.southuniversity.edu	4-year, Private for-profit	Associate's degree;Bachelor's degree;Master's degree;Doctor's degree - professional practice	Suburb: Large	No	1464	1022	15%	NA	Fall 2008	$22,003	-	251312	01303907
Information Science/Studies	Bachelors	South University-Montgomery	5355 Vaughn Rd, Montgomery, Alabama 36116	southuniversity.edu	4-year, Private for-profit	Associate's degree;Bachelor's degree;Master's degree;Post-master's certificate;Doctor's degree - professional practice	City: Midsize	No	624	523	9%	NA	Fall 2008	$23,074	-	101116	01303906
Information Science/Studies	Bachelors	South University-Savannah	709 Mall Blvd, Savannah, Georgia 31406	www.southuniversity.edu	4-year, Private for-profit	Associate's degree;Bachelor's degree;Master's degree;Post-master's certificate;Doctor's degree - research/scholarship;Doctor's degree - professional practice	City: Midsize	Yes	1490	764	9%	1%	Fall 2008	$22,955	-	139579	01303900
Information Science/Studies	Bachelors	South University–Savannah Online	709 Mall Blvd, Savannah, Georgia 31406	online.southuniversity.edu/	4-year, Private for-profit	Associate's degree;Bachelor's degree;Master's degree;Post-master's certificate;Doctor's degree - professional practice	City: Midsize	No	11522	8833	2%	NA	Fall 2008	$21,347	-	475121	01303900
Information Science/Studies	Bachelors	South University-Tampa	4401 N Himes Ave, Suite 175, Tampa, Florida 33614-7095	www.southuniversity.edu	4-year, Private for-profit	Associate's degree;Bachelor's degree;Master's degree;Post-master's certificate;Doctor's degree - professional practice	City: Large	No	955	593	14%	5%	Fall 2008	$23,504	-	449898	01303908
Information Science/Studies	Bachelors	South University–Virginia Beach	301 Bendix Rd, Ste 100, Virginia Beach, Virginia 23452	www.southuniversity.edu	4-year, Private for-profit	Associate's degree;Bachelor's degree;Master's degree	City: Large	No	857	724	NA	NA	Fall 2008	$24,500	-	459268	01303911
Information Science/Studies	Bachelors	South University-West Palm Beach	9801 Belvedere Road, Royal Palm Beach, Florida 33411	www.southuniversity.edu	4-year, Private for-profit	Associate's degree;Bachelor's degree;Master's degree;Doctor's degree - professional practice	Suburb: Large	No	1081	942	7%	NA	Fall 2008	$22,405	-	133465	01303904
Information Science/Studies	Bachelors	Southeastern Oklahoma State University	1405 N 4th Ave, Durant, Oklahoma 74701-0609	www.se.edu	4-year, Public	Bachelor's degree;Master's degree	Town: Distant	Yes	3878	3519	29%	20%	Fall 2008	$7,961	-	207847	00317900
Information Science/Studies	Bachelors	Southern Illinois University-Carbondale	Lincoln Drive, Carbondale, Illinois 62901-4512	www.siu.edu	4-year, Public	Less than one year certificate;Associate's degree;Bachelor's degree;Postbaccalaureate certificate;Master's degree;Doctor's degree - research/scholarship;Doctor's degree - professional practice	City: Small	Yes	17989	13461	44%	NA	Fall 2008	$15,778	-	149222	00175800
Information Science/Studies	Bachelors	Southwestern Adventist University	100 W Hillcrest, Keene, Texas 76059	www.swau.edu/	4-year, Private not-for-profit	Less than one year certificate;Associate's degree;Bachelor's degree;Master's degree	Town: Fringe	Yes	810	797	40%	NA	Fall 2008	$18,116	-	228468	00361900
Information Science/Studies	Bachelors	Southwestern Oklahoma State University	100 Campus Dr, Weatherford, Oklahoma 73096-3098	www.swosu.edu	4-year, Public	Less than one year certificate;Associate's degree;Bachelor's degree;Master's degree;Doctor's degree - professional practice	Town: Remote	Yes	4994	4240	34%	30%	Fall 2008	$10,500	-	207865	00318100
Information Science/Studies	Bachelors	St Catherine University	2004 Randolph Ave, Saint Paul, Minnesota 55105	www.stkate.edu	4-year, Private not-for-profit	Less than one year certificate;One but less than two years certificate;Associate's degree;Bachelor's degree;Postbaccalaureate certificate;Master's degree;Doctor's degree - professional practice	City: Large	Yes	5055	3491	59%	36%	Fall 2008	$22,146	-	175005	00234200
Information Science/Studies	Bachelors	Stevenson University	1525 Greenspring Valley Rd, Stevenson, Maryland 21153-0641	www.stevenson.edu	4-year, Private not-for-profit	Bachelor's degree;Master's degree	Rural: Fringe	Yes	4322	3808	63%	NA	Fall 2008	$26,289	-	164173	00210700
Information Science/Studies	Bachelors	Stockton University	101 Vera King Farris, Galloway, New Jersey 08205-9441	www.stockton.edu	4-year, Public	Bachelor's degree;Postbaccalaureate certificate;Master's degree;Post-master's certificate;Doctor's degree - professional practice	Suburb: Midsize	Yes	8570	7714	67%	14%	Fall 2008	$15,215	-	186876	00934500
Information Science/Studies	Bachelors	Stony Brook University	310 Administration Building, Stony Brook, New York 11794	www.stonybrook.edu	4-year, Public	Bachelor's degree;Postbaccalaureate certificate;Master's degree;Post-master's certificate;Doctor's degree - research/scholarship;Doctor's degree - professional practice	Suburb: Large	Yes	24607	16480	69%	21%	Fall 2008	$13,352	-	196097	00283800
Information Science/Studies	Bachelors	Strayer University-Alabama	3570 Grandview Pkwy Ste 200, Birmingham, Alabama 35243	www.strayer.edu/alabama/birmingham	4-year, Private for-profit	Less than one year certificate;One but less than two years certificate;Associate's degree;Bachelor's degree;Postbaccalaureate certificate;Master's degree	City: Midsize	No	833	422	0%	NA	Fall 2008	$31,954	-	450377	00145953
Information Science/Studies	Bachelors	Strayer University-Arkansas	10825 Financial Centre Pkwy Ste 400, Little Rock, Arkansas 72211	www.strayer.edu/arkansas/little-rock	4-year, Private for-profit	Less than one year certificate;One but less than two years certificate;Associate's degree;Bachelor's degree;Postbaccalaureate certificate;Master's degree	City: Midsize	No	259	152	NA	NA	Fall 2008	NA	-	458885	00145984
Information Science/Studies	Bachelors	Strayer University-Delaware	240 Continental Dr Ste 108, Newark, Delaware 19713	www.strayer.edu/delaware/christiana	4-year, Private for-profit	Less than one year certificate;One but less than two years certificate;Associate's degree;Bachelor's degree;Postbaccalaureate certificate;Master's degree	Suburb: Large	No	335	237	50%	NA	Fall 2008	NA	-	450298	00145948
Information Science/Studies	Bachelors	Strayer University-District of Columbia	1133 15th St NW, Washington, District of Columbia 20005	www.strayer.edu/district-columbia/washington	4-year, Private for-profit	Less than one year certificate;One but less than two years certificate;Associate's degree;Bachelor's degree;Postbaccalaureate certificate;Master's degree	City: Large	No	1192	783	26%	NA	Fall 2008	$30,553	-	131803	00145900
Information Science/Studies	Bachelors	Strayer University-Florida	4902 Eisenhower Blvd Ste 100, Tampa, Florida 33634	www.strayer.edu/florida/tampa-westshore	4-year, Private for-profit	Less than one year certificate;One but less than two years certificate;Associate's degree;Bachelor's degree;Postbaccalaureate certificate;Master's degree	Suburb: Large	No	2769	1927	44%	NA	Fall 2008	$28,671	-	449038	00145942
Information Science/Studies	Bachelors	Strayer University-Georgia	3355 Northeast Expwy, Ste 100, Atlanta, Georgia 30341	www.strayer.edu/georgia/chamblee	4-year, Private for-profit	Less than one year certificate;One but less than two years certificate;Associate's degree;Bachelor's degree;Postbaccalaureate certificate;Master's degree	Suburb: Large	No	5296	3627	19%	NA	Fall 2008	$29,674	-	458919	00145939
Information Science/Studies	Bachelors	Strayer University-Global Region	1133 15th St NW, Washington, District of Columbia 20005	www.strayer.edu	4-year, Private for-profit	Less than one year certificate;One but less than two years certificate;Associate's degree;Bachelor's degree;Postbaccalaureate certificate;Master's degree	City: Large	No	4500	2766	13%	NA	Fall 2008	$28,535	-	459994	00145900
Information Science/Studies	Bachelors	Strayer University-Louisiana	111 Veterans Memorial Blvd, Ste 420, Metairie, Louisiana 70005	www.strayer.edu/louisiana/metairie	4-year, Private for-profit	Less than one year certificate;One but less than two years certificate;Associate's degree;Bachelor's degree;Postbaccalaureate certificate;Master's degree	City: Midsize	No	155	114	NA	NA	Fall 2008	$27,360	-	458937	00145988
Information Science/Studies	Bachelors	Strayer University-Maryland	4710 Auth Pl 1st Fl, Suitland, Maryland 20746	www.strayer.edu/maryland/prince-georges	4-year, Private for-profit	Less than one year certificate;One but less than two years certificate;Associate's degree;Bachelor's degree;Postbaccalaureate certificate;Master's degree	Suburb: Large	No	2873	1966	22%	NA	Fall 2008	$28,771	-	430184	00145911
Information Science/Studies	Bachelors	Strayer University-Mississippi	460 Briarwood Dr, Jackson, Mississippi 39206	www.strayer.edu/mississippi/jackson	4-year, Private for-profit	Less than one year certificate;One but less than two years certificate;Associate's degree;Bachelor's degree;Postbaccalaureate certificate;Master's degree	City: Midsize	No	276	159	NA	NA	Fall 2008	NA	-	458955	00145991
Information Science/Studies	Bachelors	Strayer University-New Jersey	2201 Rte 38 Ste 100, Cherry Hill, New Jersey 08002	www.strayer.edu/new-jersey/cherry-hill	4-year, Private for-profit	Less than one year certificate;One but less than two years certificate;Associate's degree;Bachelor's degree;Postbaccalaureate certificate;Master's degree	Suburb: Large	No	858	648	9%	NA	Fall 2008	$26,419	-	453215	00145961
Information Science/Studies	Bachelors	Strayer University-North Carolina	4 Copley Pkwy, Morrisville, North Carolina 27560	www.strayer.edu/north-carolina/rtp	4-year, Private for-profit	Less than one year certificate;One but less than two years certificate;Associate's degree;Bachelor's degree;Postbaccalaureate certificate;Master's degree	Suburb: Large	No	4092	2500	13%	NA	Fall 2008	$30,447	-	453163	00145929
Information Science/Studies	Bachelors	Strayer University-Pennsylvania	3600 Horizon Blvd Ste 100, Trevose, Pennsylvania 19053	www.strayer.edu/pennsylvania/lower-bucks-county	4-year, Private for-profit	Less than one year certificate;One but less than two years certificate;Associate's degree;Bachelor's degree;Postbaccalaureate certificate;Master's degree	Suburb: Large	No	2103	1538	7%	NA	Fall 2008	$23,720	-	443784	00145935
Information Science/Studies	Bachelors	Strayer University-South Carolina	555 N Pleasantburg Dr Ste 300, Greenville, South Carolina 29607	www.strayer.edu/south-carolina/greenville	4-year, Private for-profit	Less than one year certificate;One but less than two years certificate;Associate's degree;Bachelor's degree;Postbaccalaureate certificate;Master's degree	City: Small	No	1991	1206	20%	NA	Fall 2008	$29,193	-	458964	00145937
Information Science/Studies	Bachelors	Strayer University-Tennessee	2620 Thousand Oaks Blvd Ste 1100, Memphis, Tennessee 38118	www.strayer.edu/tennessee/thousand-oaks	4-year, Private for-profit	Less than one year certificate;One but less than two years certificate;Associate's degree;Bachelor's degree;Postbaccalaureate certificate;Master's degree	City: Large	No	1960	1275	38%	NA	Fall 2008	$29,291	-	443766	00145932
Information Science/Studies	Bachelors	Strayer University-Texas	8501 N. Mopac Expressway, Austin, Texas 78759	www.strayer.edu/texas/north-austin	4-year, Private for-profit	Less than one year certificate;One but less than two years certificate;Associate's degree;Bachelor's degree;Postbaccalaureate certificate;Master's degree	City: Large	No	1626	1220	NA	NA	Fall 2008	$29,376	-	458973	00145987
Information Science/Studies	Bachelors	Strayer University-Virginia	2121 15th Street N, Arlington, Virginia 22207	www.strayer.edu/virginia/arlington	4-year, Private for-profit	Less than one year certificate;One but less than two years certificate;Associate's degree;Bachelor's degree;Postbaccalaureate certificate;Master's degree	City: Midsize	No	6850	4504	19%	NA	Fall 2008	$29,174	-	233684	00145901
Information Science/Studies	Bachelors	Strayer University-West Virginia	100 Corporate Center Dr, Scott Depot, West Virginia 25560	www.strayer.edu/west-virginia/teays-valley	4-year, Private for-profit	Less than one year certificate;One but less than two years certificate;Associate's degree;Bachelor's degree;Postbaccalaureate certificate;Master's degree	Suburb: Midsize	No	191	156	NA	NA	Fall 2008	NA	-	456621	00145974
Information Science/Studies	Bachelors	Suffolk University	8 Ashburton Place, Boston, Massachusetts 02108-2770	www.suffolk.edu	4-year, Private not-for-profit	Less than one year certificate;One but less than two years certificate;Associate's degree;Two but less than 4 years certificate;Bachelor's degree;Postbaccalaureate certificate;Master's degree;Post-master's certificate;Doctor's degree - research/scholarship;Doctor's degree - professional practice	City: Large	Yes	8215	5390	55%	NA	Fall 2008	$27,818	-	168005	00221800
Information Science/Studies	Bachelors	SUNY at Binghamton	4400 Vestal Parkway East, Vestal, New York 13850-6000	www.binghamton.edu	4-year, Public	Bachelor's degree;Master's degree;Post-master's certificate;Doctor's degree - research/scholarship;Doctor's degree - professional practice	Suburb: Midsize	Yes	16695	13412	81%	9%	Fall 2008	$15,572	-	196079	00283600
Information Science/Studies	Bachelors	SUNY at Fredonia	280 Central Ave, Fredonia, New York 14063-1136	www.fredonia.edu	4-year, Public	Bachelor's degree;Master's degree;Post-master's certificate	Town: Distant	Yes	5215	4936	67%	22%	Fall 2008	$15,756	-	196158	00284400
Information Science/Studies	Bachelors	SUNY Buffalo State	1300 Elmwood Ave, Buffalo, New York 14222	www.buffalostate.edu	4-year, Public	Bachelor's degree;Postbaccalaureate certificate;Master's degree;Post-master's certificate	City: Large	Yes	11083	9475	45%	29%	Fall 2008	$10,956	-	196130	00284200
Information Science/Studies	Bachelors	SUNY College at Brockport	350 New Campus Dr, Brockport, New York 14420-2919	www.brockport.edu	4-year, Public	Bachelor's degree;Postbaccalaureate certificate;Master's degree;Post-master's certificate	Town: Fringe	Yes	8106	7040	68%	19%	Fall 2008	$13,813	-	196121	00284100
Information Science/Studies	Bachelors	SUNY College at Old Westbury	223 Store Hill Rd, Old Westbury, New York 11568-0210	www.oldwestbury.edu	4-year, Public	Less than one year certificate;Bachelor's degree;Master's degree;Post-master's certificate	Suburb: Large	Yes	4504	4315	37%	29%	Fall 2008	$7,018	-	196237	00710900
Information Science/Studies	Bachelors	SUNY College at Oswego	7060 State Route 104, Oswego, New York 13126	www.oswego.edu/	4-year, Public	Bachelor's degree;Master's degree;Post-master's certificate	Town: Distant	Yes	8034	7193	63%	25%	Fall 2008	$15,784	-	196194	00284800
Information Science/Studies	Bachelors	SUNY Institute of Technology at Utica-Rome	100 Seymour Rd, Utica, New York 13502	www.sunyit.edu	4-year, Public	Bachelor's degree;Postbaccalaureate certificate;Master's degree;Post-master's certificate	Suburb: Midsize	Yes	2740	2037	43%	31%	Fall 2008	$15,174	-	196112	01167800
Information Science/Studies	Bachelors	Susquehanna University	514 University Ave, Selinsgrove, Pennsylvania 17870-1025	www.susqu.edu	4-year, Private not-for-profit	Bachelor's degree	Town: Distant	Yes	2093	2093	76%	NA	Fall 2008	$26,531	-	216278	00336900
Information Science/Studies	Bachelors	Syracuse University	900 South Crouse Ave., Syracuse, New York 13244	syr.edu/	4-year, Private not-for-profit	Less than one year certificate;Associate's degree;Bachelor's degree;Postbaccalaureate certificate;Master's degree;Post-master's certificate;Doctor's degree - research/scholarship;Doctor's degree - professional practice	City: Midsize	Yes	21492	15224	80%	NA	Fall 2008	$29,621	-	196413	00288200
Information Science/Studies	Bachelors	Texas A & M University-Commerce	2600 South Neal, Commerce, Texas 75429-3011	www.tamuc.edu/	4-year, Public	Bachelor's degree;Master's degree;Doctor's degree - research/scholarship	Town: Distant	Yes	12111	7374	52%	31%	Fall 2008	$8,625	-	224554	00356500
Information Science/Studies	Bachelors	Texas Lutheran University	1000 W. Court St, Seguin, Texas 78155-5999	www.tlu.edu	4-year, Private not-for-profit	Bachelor's degree;Master's degree	Town: Fringe	Yes	1320	1306	44%	NA	Fall 2008	$17,953	-	228981	00364100
Information Science/Studies	Bachelors	Texas Tech University	Broadway and University Avenue, Lubbock, Texas 79409-5005	www.ttu.edu	4-year, Public	Less than one year certificate;Bachelor's degree;Postbaccalaureate certificate;Master's degree;Doctor's degree - research/scholarship;Doctor's degree - professional practice	City: Midsize	Yes	35158	28632	59%	NA	Fall 2008	$13,901	-	229115	00364400
Information Science/Studies	Bachelors	The Sage Colleges	65 1st Street, Troy, New York 12180	www.sage.edu	4-year, Private not-for-profit	Less than one year certificate;Associate's degree;Bachelor's degree;Postbaccalaureate certificate;Master's degree;Post-master's certificate;Doctor's degree - research/scholarship;Doctor's degree - professional practice	City: Small	Yes	2878	1704	59%	NA	Fall 2008	$17,249	-	195128	00281000
Information Science/Studies	Bachelors	The University of Texas at Arlington	701 S. Nedderman Dr., Arlington, Texas 76013	WWW.UTA.EDU	4-year, Public	Less than one year certificate;Bachelor's degree;Postbaccalaureate certificate;Master's degree;Post-master's certificate;Doctor's degree - research/scholarship;Doctor's degree - professional practice	City: Large	Yes	39740	29883	42%	38%	Fall 2008	$11,622	-	228769	00365600
Information Science/Studies	Bachelors	The University of Texas at Brownsville	One West University Boulevard, Brownsville, Texas 78520	WWW.UTB.EDU	4-year, Public	Less than one year certificate;One but less than two years certificate;Associate's degree;Bachelor's degree;Master's degree;Doctor's degree - research/scholarship	City: Midsize	Yes	11943	10938	28%	NA	Fall 2008	$6,083	-	227377	03064600
Information Science/Studies	Bachelors	The University of Texas of the Permian Basin	4901 E University, Odessa, Texas 79762-0001	www.utpb.edu	4-year, Public	Bachelor's degree;Postbaccalaureate certificate;Master's degree	City: Small	Yes	5560	4661	34%	34%	Fall 2008	$8,245	-	229018	00993000
Information Science/Studies	Bachelors	Towson University	8000 York Rd, Towson, Maryland 21252-0001	www.towson.edu	4-year, Public	Bachelor's degree;Postbaccalaureate certificate;Master's degree;Post-master's certificate;Doctor's degree - research/scholarship;Doctor's degree - professional practice	City: Small	Yes	22285	18807	68%	22%	Fall 2008	$13,859	-	164076	00209900
Information Science/Studies	Bachelors	Union College	807 Union St, Schenectady, New York 12308-2311	www.union.edu/	4-year, Private not-for-profit	Bachelor's degree	City: Small	Yes	2242	2242	86%	NA	Fall 2008	$33,826	-	196866	00288900
Information Science/Studies	Bachelors	United States Military Academy	646 Swift Rd (ATTN: MASG), West Point, New York 10996-1905	www.westpoint.edu	4-year, Public	Bachelor's degree	Town: Fringe	Yes	4414	4414	80%	NA	Fall 2008	NA	-	197036	00289300
Information Science/Studies	Bachelors	University at Buffalo	12 Capen Hall, Buffalo, New York 14260-1660	www.buffalo.edu	4-year, Public	One but less than two years certificate;Associate's degree;Bachelor's degree;Master's degree;Post-master's certificate;Doctor's degree - research/scholarship;Doctor's degree - professional practice	Suburb: Large	Yes	29995	19882	72%	16%	Fall 2008	$14,546	-	196088	00283700
Information Science/Studies	Bachelors	University of Advancing Technology	2625 W Baseline Rd, Tempe, Arizona 85283	www.uat.edu	4-year, Private for-profit	Associate's degree;Bachelor's degree;Master's degree	City: Midsize	Yes	819	784	31%	13%	Fall 2008	$28,045	-	363934	02559000
Information Science/Studies	Bachelors	University of Arkansas at Little Rock	2801 S University Ave, Little Rock, Arkansas 72204	ualr.edu/www/	4-year, Public	Less than one year certificate;Associate's degree;Bachelor's degree;Postbaccalaureate certificate;Master's degree;Post-master's certificate;Doctor's degree - research/scholarship;Doctor's degree - professional practice	City: Midsize	Yes	11645	9384	27%	39%	Fall 2008	$12,780	-	106245	00110100
Information Science/Studies	Bachelors	University of Baltimore	Charles at Mount Royal, Baltimore, Maryland 21201-5720	www.ubalt.edu	4-year, Public	Two but less than 4 years certificate;Bachelor's degree;Postbaccalaureate certificate;Master's degree;Post-master's certificate;Doctor's degree - research/scholarship;Doctor's degree - professional practice	City: Large	No	6422	3485	43%	27%	Fall 2008	$14,648	-	161873	00210200
Information Science/Studies	Bachelors	University of California-Riverside	900 University Ave, Riverside, California 92521	WWW.UCR.EDU	4-year, Public	Bachelor's degree;Master's degree;Doctor's degree - research/scholarship;Doctor's degree - professional practice	City: Large	Yes	21498	18790	69%	NA	Fall 2008	$13,110	-	110671	00131600
Information Science/Studies	Bachelors	University of Cincinnati-Main Campus	2624 Clifton Avenue, Cincinnati, Ohio 45221-0063	www.uc.edu	4-year, Public	Less than one year certificate;One but less than two years certificate;Associate's degree;Two but less than 4 years certificate;Bachelor's degree;Postbaccalaureate certificate;Master's degree;Post-master's certificate;Doctor's degree - research/scholarship;Doctor's degree - professional practice	City: Large	Yes	35313	24300	60%	23%	Fall 2008	$19,739	-	201885	00312500
Information Science/Studies	Bachelors	University of Colorado Boulder	Regent Drive at Broadway, Boulder, Colorado 80309-0017	www.colorado.edu	4-year, Public	Bachelor's degree;Postbaccalaureate certificate;Master's degree;Post-master's certificate;Doctor's degree - research/scholarship;Doctor's degree - professional practice	City: Small	Yes	32432	26557	70%	21%	Fall 2008	$21,053	-	126614	00137000
Information Science/Studies	Bachelors	University of Hartford	200 Bloomfield Ave, West Hartford, Connecticut 06117-1599	www.hartford.edu	4-year, Private not-for-profit	Less than one year certificate;Associate's degree;Bachelor's degree;Postbaccalaureate certificate;Master's degree;Post-master's certificate;Doctor's degree - research/scholarship;Doctor's degree - professional practice	City: Midsize	Yes	6817	5180	53%	NA	Fall 2008	$27,907	-	129525	00142200
Information Science/Studies	Bachelors	University of Houston	212 E. Cullen Building, Houston, Texas 77204-2018	www.uh.edu/students	4-year, Public	Bachelor's degree;Master's degree;Doctor's degree - research/scholarship;Doctor's degree - professional practice	City: Large	Yes	40914	33037	48%	20%	Fall 2008	$12,618	-	225511	00365200
Information Science/Studies	Bachelors	University of Houston-Victoria	3007 N. Ben Wilson, Victoria, Texas 77901	www.uhv.edu	4-year, Public	Bachelor's degree;Master's degree	City: Small	Yes	4407	3012	NA	NA	Fall 2008	$10,131	-	225502	01323100
Information Science/Studies	Bachelors	University of Illinois at Chicago	601 S Morgan, Chicago, Illinois 60607	www.uic.edu/index.html/	4-year, Public	Bachelor's degree;Postbaccalaureate certificate;Master's degree;Post-master's certificate;Doctor's degree - research/scholarship;Doctor's degree - professional practice	City: Large	Yes	27969	16718	60%	NA	Fall 2008	$11,567	-	145600	00177600
Information Science/Studies	Bachelors	University of Iowa	101 Jessup Hall, Iowa City, Iowa 52242-1316	www.uiowa.edu	4-year, Public	Two but less than 4 years certificate;Bachelor's degree;Postbaccalaureate certificate;Master's degree;Post-master's certificate;Doctor's degree - research/scholarship;Doctor's degree - professional practice	City: Small	Yes	29970	22354	70%	24%	Fall 2008	$14,315	-	153658	00189200
Information Science/Studies	Bachelors	University of Mary	7500 University Dr, Bismarck, North Dakota 58504	www.umary.edu/	4-year, Private not-for-profit	Bachelor's degree;Master's degree;Doctor's degree - professional practice	Rural: Fringe	Yes	2809	2036	46%	27%	Fall 2008	$15,281	-	200217	00299200
Information Science/Studies	Bachelors	University of Mary Hardin-Baylor	900 College St, Belton, Texas 76513-2599	www.umhb.edu	4-year, Private not-for-profit	Bachelor's degree;Postbaccalaureate certificate;Master's degree;Post-master's certificate;Doctor's degree - research/scholarship	Suburb: Small	Yes	3740	3110	48%	NA	Fall 2008	$23,307	-	226471	00358800
Information Science/Studies	Bachelors	University of Maryland-Baltimore County	1000 Hilltop Circle, Baltimore, Maryland 21250	www.umbc.edu	4-year, Public	Bachelor's degree;Postbaccalaureate certificate;Master's degree;Doctor's degree - research/scholarship	Suburb: Large	Yes	13979	11379	61%	25%	Fall 2008	$14,137	-	163268	00210500
Information Science/Studies	Bachelors	University of Maryland-College Park	College Park, Maryland 20742	www.umd.edu	4-year, Public	Two but less than 4 years certificate;Bachelor's degree;Postbaccalaureate certificate;Master's degree;Post-master's certificate;Doctor's degree - research/scholarship;Doctor's degree - professional practice	Suburb: Large	Yes	37610	27056	85%	6%	Fall 2008	$14,833	-	163286	00210300
Information Science/Studies	Bachelors	University of Maryland-University College	3501 University Blvd East, Adelphi, Maryland 20783-8010	www.umuc.edu	4-year, Public	Associate's degree;Two but less than 4 years certificate;Bachelor's degree;Postbaccalaureate certificate;Master's degree;Doctor's degree - professional practice	Suburb: Large	No	47906	35154	8%	23%	Fall 2008	$10,588	-	163204	01164400
Information Science/Studies	Bachelors	University of Massachusetts-Lowell	1 University Ave, Lowell, Massachusetts 01854-5104	www.uml.edu	4-year, Public	Less than one year certificate;Associate's degree;Bachelor's degree;Postbaccalaureate certificate;Master's degree;Post-master's certificate;Doctor's degree - research/scholarship;Doctor's degree - professional practice	Suburb: Large	Yes	17179	12983	54%	NA	Fall 2008	$15,965	-	166513	00216100
Information Science/Studies	Bachelors	University of Miami	University of Miami, Coral Gables, Florida 33146	www.miami.edu/	4-year, Private not-for-profit	Less than one year certificate;One but less than two years certificate;Bachelor's degree;Postbaccalaureate certificate;Master's degree;Post-master's certificate;Doctor's degree - research/scholarship;Doctor's degree - professional practice	Suburb: Large	Yes	16674	11175	81%	NA	Fall 2008	$33,284	-	135726	00153600
Information Science/Studies	Bachelors	University of Michigan-Flint	303 E. Kearsley Street, Flint, Michigan 48502-1950	www.umflint.edu	4-year, Public	Bachelor's degree;Postbaccalaureate certificate;Master's degree;Post-master's certificate;Doctor's degree - professional practice	City: Midsize	Yes	8574	7078	34%	NA	Fall 2008	$11,657	-	171146	00232700
Information Science/Studies	Bachelors	University of Mount Olive	634 Henderson St, Mount Olive, North Carolina 28365-0919	www.umo.edu	4-year, Private not-for-profit	Associate's degree;Bachelor's degree;Master's degree	Town: Fringe	Yes	3456	3406	43%	25%	Fall 2008	$12,245	-	199069	00294900
Information Science/Studies	Bachelors	University of Nebraska at Omaha	6001 Dodge St, Omaha, Nebraska 68182-0225	www.unomaha.edu	4-year, Public	Bachelor's degree;Postbaccalaureate certificate;Master's degree;Post-master's certificate;Doctor's degree - research/scholarship	City: Large	Yes	15227	12221	45%	31%	Fall 2008	$10,979	-	181394	00255400
Information Science/Studies	Bachelors	University of Nevada-Las Vegas	4505 S Maryland Pky, Las Vegas, Nevada 89154	www.unlv.edu/	4-year, Public	Two but less than 4 years certificate;Bachelor's degree;Postbaccalaureate certificate;Master's degree;Post-master's certificate;Doctor's degree - research/scholarship;Doctor's degree - professional practice	City: Midsize	Yes	28515	23803	39%	NA	Fall 2008	$12,240	-	182281	00256900
Information Science/Studies	Bachelors	University of New Haven	300 Boston Post Road, West Haven, Connecticut 06516	www.newhaven.edu	4-year, Private not-for-profit	Less than one year certificate;Associate's degree;Bachelor's degree;Postbaccalaureate certificate;Master's degree;Post-master's certificate;Doctor's degree - research/scholarship	Suburb: Large	Yes	6811	5048	50%	NA	Fall 2008	$30,798	-	129941	00139700
Information Science/Studies	Bachelors	University of North Carolina at Chapel Hill	103 South Bldg Cb 9100, Chapel Hill, North Carolina 27599	www.unc.edu	4-year, Public	One but less than two years certificate;Bachelor's degree;Postbaccalaureate certificate;Master's degree;Post-master's certificate;Doctor's degree - research/scholarship;Doctor's degree - professional practice	City: Small	Yes	29135	18350	90%	2%	Fall 2008	$10,936	-	199120	00297400
Information Science/Studies	Bachelors	University of North Georgia	82 College Circle, Dahlonega, Georgia 30597	www.ung.edu	4-year, Public	Less than one year certificate;One but less than two years certificate;Associate's degree;Bachelor's degree;Master's degree;Post-master's certificate;Doctor's degree - professional practice	Town: Fringe	Yes	16064	15507	25%	26%	Fall 2008	$10,262	-	482680	00158500
Information Science/Studies	Bachelors	University of North Texas	1501 W.Chestnut Ave., Denton, Texas 76203-1277	www.unt.edu	4-year, Public	Two but less than 4 years certificate;Bachelor's degree;Postbaccalaureate certificate;Master's degree;Doctor's degree - research/scholarship;Doctor's degree - professional practice	City: Midsize	Yes	36486	29758	50%	30%	Fall 2008	$10,827	-	227216	00359400
Information Science/Studies	Bachelors	University of Oklahoma-Norman Campus	660 Parrington Oval, Norman, Oklahoma 73019-3072	www.ou.edu	4-year, Public	Bachelor's degree;Postbaccalaureate certificate;Master's degree;Doctor's degree - research/scholarship;Doctor's degree - professional practice	Suburb: Midsize	Yes	27261	21011	67%	NA	Fall 2008	$16,813	-	207500	00318400
Information Science/Studies	Bachelors	University of Pittsburgh-Pittsburgh Campus	4200 Fifth Avenue, Pittsburgh, Pennsylvania 15260	www.pitt.edu	4-year, Public	Less than one year certificate;Two but less than 4 years certificate;Bachelor's degree;Postbaccalaureate certificate;Master's degree;Post-master's certificate;Doctor's degree - research/scholarship;Doctor's degree - professional practice	City: Large	Yes	28617	18757	82%	NA	Fall 2008	$23,489	-	215293	00337900
Information Science/Studies	Bachelors	University of Richmond	28 Westhampton Way, University of Richmond, Virginia 23173	www.richmond.edu	4-year, Private not-for-profit	Less than one year certificate;One but less than two years certificate;Associate's degree;Bachelor's degree;Postbaccalaureate certificate;Master's degree;Post-master's certificate;Doctor's degree - professional practice	City: Midsize	Yes	4182	3346	84%	NA	Fall 2008	$24,011	-	233374	00374400
Information Science/Studies	Bachelors	University of Rio Grande	218 N College Ave, Rio Grande, Ohio 45674	www.rio.edu	4-year, primarily associate's, Private not-for-profit	Less than one year certificate;One but less than two years certificate;Associate's degree;Bachelor's degree;Master's degree	Rural: Distant	Yes	2202	2147	39%	32%	Fall 2008	$26,798	-	205203	00311600
Information Science/Studies	Bachelors	University of Scranton	800 Linden Street, Scranton, Pennsylvania 18510-4629	www.scranton.edu	4-year, Private not-for-profit	One but less than two years certificate;Associate's degree;Bachelor's degree;Postbaccalaureate certificate;Master's degree;Post-master's certificate;Doctor's degree - professional practice	City: Small	Yes	5589	3998	80%	NA	Fall 2008	$33,353	-	215929	00338400
Information Science/Studies	Bachelors	University of South Alabama	307 N University Blvd, Mobile, Alabama 36688-0002	www.southalabama.edu	4-year, Public	Less than one year certificate;One but less than two years certificate;Two but less than 4 years certificate;Bachelor's degree;Postbaccalaureate certificate;Master's degree;Post-master's certificate;Doctor's degree - research/scholarship;Doctor's degree - professional practice	City: Midsize	Yes	15805	11479	38%	32%	Fall 2008	$12,066	-	102094	00105700
Information Science/Studies	Bachelors	University of South Carolina-Columbia	Columbia-Campus, Columbia, South Carolina 29208	www.sc.edu/	4-year, Public	Bachelor's degree;Postbaccalaureate certificate;Master's degree;Post-master's certificate;Doctor's degree - research/scholarship;Doctor's degree - professional practice	City: Midsize	Yes	32971	24866	73%	9%	Fall 2008	$17,972	-	218663	00344800
Information Science/Studies	Bachelors	University of South Carolina-Upstate	800 University Way, Spartanburg, South Carolina 29303-4999	www.uscupstate.edu	4-year, Public	Bachelor's degree;Postbaccalaureate certificate;Master's degree	Suburb: Midsize	Yes	5585	5397	38%	34%	Fall 2008	$14,597	-	218742	00695100
Information Science/Studies	Bachelors	University of South Florida-Main Campus	4202 East Fowler Ave, Tampa, Florida 33620-9951	www.usf.edu	4-year, Public	Associate's degree;Bachelor's degree;Master's degree;Post-master's certificate;Doctor's degree - research/scholarship;Doctor's degree - professional practice	City: Large	Yes	41938	31067	67%	6%	Fall 2008	$11,355	-	137351	00153700
Information Science/Studies	Bachelors	University of St Thomas	2115 Summit Ave, Saint Paul, Minnesota 55105-1078	www.stthomas.edu	4-year, Private not-for-profit	Two but less than 4 years certificate;Bachelor's degree;Postbaccalaureate certificate;Master's degree;Post-master's certificate;Doctor's degree - research/scholarship;Doctor's degree - professional practice	City: Large	Yes	10140	6148	72%	21%	Fall 2008	$30,606	-	174914	00234500
Information Science/Studies	Bachelors	University of Toledo	2801 W Bancroft, Toledo, Ohio 43606-3390	www.utoledo.edu/	4-year, Public	Less than one year certificate;One but less than two years certificate;Associate's degree;Bachelor's degree;Postbaccalaureate certificate;Master's degree;Post-master's certificate;Doctor's degree - research/scholarship;Doctor's degree - professional practice;Doctor's degree - other	City: Large	Yes	20626	16090	44%	NA	Fall 2008	$14,722	-	206084	00313100
Information Science/Studies	Bachelors	University of Tulsa	800 South Tucker Drive, Tulsa, Oklahoma 74104-3189	www.utulsa.edu	4-year, Private not-for-profit	Bachelor's degree;Postbaccalaureate certificate;Master's degree;Doctor's degree - research/scholarship;Doctor's degree - professional practice	City: Large	Yes	4682	3473	70%	NA	Fall 2008	$28,105	-	207971	00318500
Information Science/Studies	Bachelors	University of Utah	201 Presidents Circle, ROOM 201, Salt Lake City, Utah 84112-9008	www.utah.edu	4-year, Public	Bachelor's degree;Postbaccalaureate certificate;Master's degree;Post-master's certificate;Doctor's degree - research/scholarship;Doctor's degree - professional practice	City: Midsize	Yes	31515	23907	62%	NA	Fall 2008	$11,277	-	230764	00367500
Information Science/Studies	Bachelors	University of Washington-Bothell Campus	18115 Campus Way NE, Bothell, Washington 98011-8246	www.uwb.edu	4-year, Public	Bachelor's degree;Master's degree	Suburb: Large	Yes	4962	4405	67%	NA	Fall 2008	$9,209	-	377555	00379802
Information Science/Studies	Bachelors	University of Wisconsin-Green Bay	2420 Nicolet Dr, Green Bay, Wisconsin 54311-7001	www.uwgb.edu	4-year, Public	Associate's degree;Bachelor's degree;Master's degree	City: Midsize	Yes	6927	6674	51%	NA	Fall 2008	$11,937	-	240277	00389900
Information Science/Studies	Bachelors	University of Wisconsin-Milwaukee	2200 E Kenwood Blvd, Milwaukee, Wisconsin 53201-0413	www.uwm.edu	4-year, Public	Two but less than 4 years certificate;Bachelor's degree;Postbaccalaureate certificate;Master's degree;Post-master's certificate;Doctor's degree - research/scholarship;Doctor's degree - professional practice	City: Large	Yes	27596	22674	44%	NA	Fall 2008	$13,940	-	240453	00389600
Information Science/Studies	Bachelors	Urbana University	579 College Way, Urbana, Ohio 43078-2091	www.urbana.edu	4-year, Private not-for-profit	Less than one year certificate;One but less than two years certificate;Associate's degree;Bachelor's degree;Postbaccalaureate certificate;Master's degree	Rural: Fringe	Yes	1922	1717	36%	12%	Fall 2008	$19,043	-	206330	00313300
Information Science/Studies	Bachelors	Utah State University	Old Main Hill, Logan, Utah 84322-1400	www.usu.edu	4-year, Public	One but less than two years certificate;Associate's degree;Bachelor's degree;Postbaccalaureate certificate;Master's degree;Doctor's degree - research/scholarship;Doctor's degree - professional practice	City: Small	Yes	27662	24271	50%	NA	Fall 2008	$12,184	-	230728	00367700
Information Science/Studies	Bachelors	Utah Valley University	800 W University Parkway, Orem, Utah 84058-5999	www.uvu.edu	4-year, Public	Less than one year certificate;One but less than two years certificate;Associate's degree;Bachelor's degree;Postbaccalaureate certificate;Master's degree	City: Small	No	31332	31163	31%	25%	Fall 2008	$6,766	-	230737	00402700
Information Science/Studies	Bachelors	Valdosta State University	1500 N Patterson St, Valdosta, Georgia 31698	www.valdosta.edu	4-year, Public	Associate's degree;Bachelor's degree;Master's degree;Post-master's certificate;Doctor's degree - research/scholarship;Doctor's degree - professional practice	City: Small	Yes	11563	9328	39%	31%	Fall 2008	$13,701	-	141264	00159900
Information Science/Studies	Bachelors	Virginia Commonwealth University	910 W Franklin St, Richmond, Virginia 23284-2512	www.vcu.edu/	4-year, Public	Two but less than 4 years certificate;Bachelor's degree;Postbaccalaureate certificate;Master's degree;Post-master's certificate;Doctor's degree - research/scholarship;Doctor's degree - professional practice	City: Midsize	Yes	30848	23661	59%	26%	Fall 2008	$19,335	-	234030	00373500
Information Science/Studies	Bachelors	Walden University	100 Washington Avenue South, Suite 900, Minneapolis, Minnesota 55401	www.waldenu.edu	4-year, Private for-profit	Less than one year certificate;Bachelor's degree;Postbaccalaureate certificate;Master's degree;Post-master's certificate;Doctor's degree - research/scholarship	City: Large	No	52188	8960	33%	NA	Fall 2008	$27,851	-	125231	02504200
Information Science/Studies	Bachelors	Washington Adventist University	7600 Flower Ave, Takoma Park, Maryland 20912	www.wau.edu	4-year, Private not-for-profit	One but less than two years certificate;Associate's degree;Two but less than 4 years certificate;Bachelor's degree;Postbaccalaureate certificate;Master's degree	Suburb: Large	Yes	1057	876	40%	NA	Fall 2008	$17,055	-	162210	00206700
Information Science/Studies	Bachelors	Wayne State College	1111 Main St, Wayne, Nebraska 68787	www.wsc.edu	4-year, Public	Bachelor's degree;Master's degree;Post-master's certificate	Town: Distant	Yes	3470	2969	49%	38%	Fall 2008	$11,307	-	181783	00256600
Information Science/Studies	Bachelors	Wayne State University	656 West Kirby Street, Detroit, Michigan 48202	www.wayne.edu	4-year, Public	Two but less than 4 years certificate;Bachelor's degree;Postbaccalaureate certificate;Master's degree;Post-master's certificate;Doctor's degree - research/scholarship;Doctor's degree - professional practice	City: Large	Yes	27578	18347	34%	39%	Fall 2008	$12,095	-	172644	00232900
Information Science/Studies	Bachelors	Weber State University	3850 Dixon Parkway Dr. Dept. 1031, Ogden, Utah 84408-1031	www.weber.edu	4-year, Public	Less than one year certificate;One but less than two years certificate;Associate's degree;Two but less than 4 years certificate;Bachelor's degree;Postbaccalaureate certificate;Master's degree	City: Small	Yes	25954	25316	35%	17%	Fall 2008	$10,005	-	230782	00368000
Information Science/Studies	Bachelors	West Virginia Wesleyan College	59 College Ave, Buckhannon, West Virginia 26201-2994	www.wvwc.edu	4-year, Private not-for-profit	Bachelor's degree;Master's degree;Post-master's certificate	Town: Remote	Yes	1511	1390	58%	NA	Fall 2008	$17,585	-	237969	00383000
Information Science/Studies	Bachelors	Western Oregon University	345 North Monmouth Ave, Monmouth, Oregon 97361-1394	www.wou.edu	4-year, Public	Associate's degree;Bachelor's degree;Postbaccalaureate certificate;Master's degree	Town: Fringe	Yes	6049	4986	47%	13%	Fall 2008	$15,804	-	210429	00320900
Information Science/Studies	Bachelors	Westfield State University	577 Western Ave, Westfield, Massachusetts 01086-1630	www.westfield.ma.edu	4-year, Public	Bachelor's degree;Postbaccalaureate certificate;Master's degree;Post-master's certificate	Suburb: Large	Yes	6321	5590	63%	NA	Fall 2008	$15,498	-	168263	00218900
Information Science/Studies	Bachelors	Westminster College	319 South Market Street, New Wilmington, Pennsylvania 16172	www.westminster.edu	4-year, Private not-for-profit	Bachelor's degree;Master's degree	Town: Fringe	Yes	1307	1159	76%	NA	Fall 2008	$21,635	-	216807	00339200
Information Science/Studies	Bachelors	Widener University-Delaware Campus	4601 Concord Pike, Wilmington, Delaware 19803	www.widener.edu	4-year, Private not-for-profit	Associate's degree;Bachelor's degree;Master's degree;Doctor's degree - research/scholarship;Doctor's degree - professional practice	Suburb: Large	No	742	93	80%	NA	Fall 2008	$17,721	-	244190	00331301
Information Science/Studies	Bachelors	Widener University-Main Campus	One University Place, Chester, Pennsylvania 19013-5792	www.widener.edu	4-year, Private not-for-profit	Associate's degree;Bachelor's degree;Postbaccalaureate certificate;Master's degree;Post-master's certificate;Doctor's degree - research/scholarship;Doctor's degree - professional practice	Suburb: Large	Yes	4912	3350	53%	26%	Fall 2008	$27,473	-	216852	00331300
Information Science/Studies	Bachelors	Wilkes University	84 West South Street, Wilkes-Barre, Pennsylvania 18766	www.wilkes.edu	4-year, Private not-for-profit	Bachelor's degree;Master's degree;Doctor's degree - research/scholarship;Doctor's degree - professional practice	City: Small	Yes	4562	2360	56%	35%	Fall 2008	$25,683	-	216931	00339400
Information Science/Studies	Bachelors	William Jewell College	500 College Hill, Liberty, Missouri 64068-1896	www.jewell.edu	4-year, Private not-for-profit	Bachelor's degree;Master's degree	Suburb: Large	Yes	1060	1043	60%	NA	Fall 2008	$21,173	-	179955	00252400
Information Science/Studies	Bachelors	Winston-Salem State University	601 Martin Luther King Jr Dr, Winston-Salem, North Carolina 27110-0001	www.wssu.edu	4-year, Public	Bachelor's degree;Postbaccalaureate certificate;Master's degree;Post-master's certificate;Doctor's degree - professional practice	City: Midsize	Yes	5220	4793	46%	19%	Fall 2008	$7,737	-	199999	00298600
		* Cohort Year represents the year for which students began their studies and applies to Graduation and Transfer Out Rates.
		** Net Price is Average Net Price for 2013-2014 generated for full-time beginning undergraduate students who were awarded grant or scholarship aid from federal, state or local governments, or the institution. For public institutions only students paying the in-state or in-district rate are included. For institutions that charge students by program, net price is generated for the institution’s lar…
		NA (Not applicable) - Graduation rate, transfer-out rate and the net price are not applicable to institutions that do not have full-time, first-time degree-seeking undergraduate students in the applicable cohort year or the financial aid year.
		National Center for Education Statistics
		College Navigator
		Generated at:9/4/2015 11:32:23 AM from URL:http://nces.ed.gov/collegenavigator/default.aspx?s=all&p=11.0401&l=92&xp=1
		Name	Address	Website	Type	Awards offered	Campus setting	Campus housing	Student population	Undergraduate students	Graduation Rate	Transfer-Out Rate	Cohort Year *	Net Price **	Largest Program	IPEDS ID	OPE ID
Information Science/Studies	Associates	Alamance Community College	1247 Jimmie Kerr Road, Graham, North Carolina 27253-8000	www.alamancecc.edu	2-year, Public	Less than one year certificate;One but less than two years certificate;Associate's degree	Rural: Fringe	No	4437	4437	11%	18%	Fall 2011	$9,477	-	199786	00546300
Information Science/Studies	Associates	Alexandria Technical & Community College	1601 Jefferson Streeet, Alexandria, Minnesota 56308	www.alextech.edu	2-year, Public	Less than one year certificate;One but less than two years certificate;Associate's degree;Two but less than 4 years certificate	Rural: Fringe	No	2604	2604	58%	12%	Fall 2011	$13,842	-	172918	00554400
Information Science/Studies	Associates	Alpena Community College	665 Johnson St, Alpena, Michigan 49707	www.alpenacc.edu	2-year, Public	Less than one year certificate;One but less than two years certificate;Associate's degree	Rural: Fringe	No	1636	1636	35%	18%	Fall 2011	$3,626	-	168607	00223700
Information Science/Studies	Associates	Arkansas State University-Mountain Home	1600 South College Street, Mountain Home, Arkansas 72653	www.asumh.edu	2-year, Public	Less than one year certificate;One but less than two years certificate;Associate's degree	Town: Remote	No	1393	1393	24%	20%	Fall 2011	$4,902	-	420538	00109003
Information Science/Studies	Associates	Asheville-Buncombe Technical Community College	340 Victoria Rd, Asheville, North Carolina 28801-4897	www.abtech.edu	2-year, Public	Less than one year certificate;One but less than two years certificate;Associate's degree	City: Small	No	7507	7507	28%	16%	Fall 2011	$8,839	-	197887	00403300
Information Science/Studies	Associates	Barton County Community College	245 NE 30th Road, Great Bend, Kansas 67530	www.bartonccc.edu	2-year, Public	Less than one year certificate;One but less than two years certificate;Associate's degree	Rural: Fringe	Yes	5292	5292	28%	27%	Fall 2011	$8,886	-	154697	00460800
Information Science/Studies	Associates	Blue Ridge Community and Technical College	13650 Apple Harvest Drive, Martinsburg, West Virginia 25403	www.blueridgectc.edu	2-year, Public	One but less than two years certificate;Associate's degree	Rural: Fringe	No	5528	5528	9%	8%	Fall 2011	$7,579	-	446774	03957300
Information Science/Studies	Associates	Blue Ridge Community College	180 West Campus Drive, Flat Rock, North Carolina 28731-4728	www.blueridge.edu	2-year, Public	Less than one year certificate;One but less than two years certificate;Associate's degree	Suburb: Large	No	2215	2215	24%	19%	Fall 2011	$8,624	-	198039	00968400
Information Science/Studies	Associates	Bossier Parish Community College	6220 East Texas, Bossier City, Louisiana 71111-6922	www.bpcc.edu	2-year, Public	Less than one year certificate;One but less than two years certificate;Associate's degree	City: Small	No	8693	8693	11%	41%	Fall 2011	$8,220	-	158431	02055400
Information Science/Studies	Associates	Bucks County Community College	275 Swamp Rd, Newtown, Pennsylvania 18940-4106	www.bucks.edu/	2-year, Public	Less than one year certificate;One but less than two years certificate;Associate's degree	Rural: Fringe	No	8979	8979	12%	35%	Fall 2011	$7,589	-	211307	00323900
Information Science/Studies	Associates	Caldwell Community College and Technical Institute	2855 Hickory Blvd., Hudson, North Carolina 28638	www.cccti.edu	2-year, Public	Less than one year certificate;One but less than two years certificate;Associate's degree	Suburb: Midsize	No	3876	3876	12%	17%	Fall 2011	$11,646	-	198118	00483500
Information Science/Studies	Associates	Cape Cod Community College	2240 Iyannough Rd, West Barnstable, Massachusetts 02668-1599	www.capecod.edu	2-year, Public	Less than one year certificate;Associate's degree	City: Small	No	3818	3818	16%	16%	Fall 2011	$8,882	-	165194	00216800
Information Science/Studies	Associates	Capital Community College	950 Main Street, Hartford, Connecticut 06103	www.ccc.commnet.edu	2-year, Public	Less than one year certificate;One but less than two years certificate;Associate's degree	City: Midsize	No	4075	4075	7%	28%	Fall 2011	$8,805	-	129367	00763500
Information Science/Studies	Associates	Carteret Community College	3505 Arendell St, Morehead City, North Carolina 28557-2989	www.carteret.edu	2-year, Public	Less than one year certificate;One but less than two years certificate;Associate's degree	Town: Distant	No	1659	1659	19%	26%	Fall 2011	$10,468	-	198206	00808100
Information Science/Studies	Associates	Catawba Valley Community College	2550 Hwy 70 SE, Hickory, North Carolina 28602-0699	www.cvcc.edu	2-year, Public	Less than one year certificate;One but less than two years certificate;Associate's degree	City: Small	No	4742	4742	14%	24%	Fall 2011	$12,353	-	198233	00531800
Information Science/Studies	Associates	Cayuga County Community College	197 Franklin St, Auburn, New York 13021-3099	www.cayuga-cc.edu/	2-year, Public	Less than one year certificate;One but less than two years certificate;Associate's degree	Town: Distant	No	4290	4290	27%	19%	Fall 2011	$6,037	-	189839	00286100
Information Science/Studies	Associates	Central Piedmont Community College	1201 Elizabeth Avenue, Charlotte, North Carolina 28204	www.cpcc.edu	2-year, Public	Less than one year certificate;One but less than two years certificate;Associate's degree	City: Large	No	19957	19957	11%	31%	Fall 2011	$8,268	-	198260	00291500
Information Science/Studies	Associates	Century College	3300 Century Ave N, White Bear Lake, Minnesota 55110	www.century.edu	2-year, Public	Less than one year certificate;One but less than two years certificate;Associate's degree;Two but less than 4 years certificate	Suburb: Large	No	9478	9478	14%	23%	Fall 2011	$8,868	-	175315	01054600
Information Science/Studies	Associates	Clayton State University	2000 Clayton State Boulevard, Morrow, Georgia 30260-0285	www.clayton.edu	4-year, Public	Less than one year certificate;One but less than two years certificate;Associate's degree;Bachelor's degree;Master's degree	Suburb: Large	Yes	7022	6632	33%	27%	Fall 2008	$10,898	-	139311	00897600
Information Science/Studies	Associates	Cleveland Community College	137 S Post Rd, Shelby, North Carolina 28152-6224	www.clevelandcc.edu	2-year, Public	Less than one year certificate;One but less than two years certificate;Associate's degree	Town: Fringe	No	2990	2990	19%	26%	Fall 2011	$503	-	198321	00808200
Information Science/Studies	Associates	Clinton Community College	136 Clinton Point Dr, Plattsburgh, New York 12901	www.clinton.edu	2-year, Public	One but less than two years certificate;Associate's degree	Town: Distant	Yes	1870	1870	29%	19%	Fall 2011	$7,179	-	190053	00678700
Information Science/Studies	Associates	Coastal Carolina Community College	444 Western Blvd, Jacksonville, North Carolina 28546-6816	www.coastalcarolina.edu/	2-year, Public	Less than one year certificate;One but less than two years certificate;Associate's degree	City: Small	No	4355	4355	20%	25%	Fall 2011	$8,771	-	198330	00531600
Information Science/Studies	Associates	Cochise County Community College District	4190 W Highway 80, Douglas, Arizona 85607-6190	www.cochise.edu	2-year, Public	Less than one year certificate;One but less than two years certificate;Associate's degree	Rural: Distant	Yes	4379	4379	23%	22%	Fall 2011	$5,764	-	104425	00107200
Information Science/Studies	Associates	Colegio Universitario de San Juan	180 Jose Oliver St Tres Monjitas Ind. Park, San Juan, Puerto Rico 00918	www.cunisanjuan.edu	4-year, Public	Less than one year certificate;Associate's degree;Bachelor's degree	City: Large	No	1405	1405	33%	12%	Fall 2008	$1,065	-	241720	01056700
Information Science/Studies	Associates	College of the Albemarle	1208 N Road St, Elizabeth City, North Carolina 27906-2327	www.albemarle.edu	2-year, Public	Less than one year certificate;One but less than two years certificate;Associate's degree	Town: Distant	No	2408	2408	18%	23%	Fall 2011	$7,277	-	197814	00291700
Information Science/Studies	Associates	Connors State College	Route 1, Warner, Oklahoma 74469	www.connorsstate.edu	2-year, Public	Less than one year certificate;One but less than two years certificate;Associate's degree	Rural: Remote	Yes	2278	2278	13%	14%	Fall 2011	$8,921	-	206996	00315300
Information Science/Studies	Associates	Corning Community College	1 Academic Dr, Corning, New York 14830	www.corning-cc.edu/	2-year, Public	One but less than two years certificate;Associate's degree	Rural: Fringe	Yes	4520	4520	26%	7%	Fall 2011	$6,593	-	190442	00286300
Information Science/Studies	Associates	Cuyahoga Community College District	700 Carnegie Ave, Cleveland, Ohio 44115-2878	www.tri-c.edu	2-year, Public	Less than one year certificate;One but less than two years certificate;Associate's degree	City: Large	No	27084	27084	5%	20%	Fall 2011	$5,372	-	202356	00304000
Information Science/Studies	Associates	Davidson County Community College	297 Davidson Community College Rd, Thomasville, North Carolina 27360-7385	www.davidsonccc.edu	2-year, Public	Less than one year certificate;One but less than two years certificate;Associate's degree	Rural: Fringe	No	4102	4102	23%	25%	Fall 2011	$8,081	-	198376	00291900
Information Science/Studies	Associates	Durham Technical Community College	1637 Lawson Street, Durham, North Carolina 27703-5023	www.durhamtech.edu	2-year, Public	Less than one year certificate;One but less than two years certificate;Associate's degree	City: Midsize	No	5035	5035	12%	21%	Fall 2011	$5,652	-	198455	00544800
Information Science/Studies	Associates	Dutchess Community College	53 Pendell Rd, Poughkeepsie, New York 12601-1595	www.sunydutchess.edu	2-year, Public	One but less than two years certificate;Associate's degree	Suburb: Large	Yes	9905	9905	26%	18%	Fall 2011	$6,264	-	190840	00286400
Information Science/Studies	Associates	Dyersburg State Community College	1510 Lake Rd, Dyersburg, Tennessee 38024-2411	www.dscc.edu	2-year, Public	Less than one year certificate;One but less than two years certificate;Associate's degree	Town: Distant	No	2847	2847	13%	30%	Fall 2011	$6,155	-	220057	00683500
Information Science/Studies	Associates	Eastern Arizona College	615 N. Stadium Ave., Thatcher, Arizona 85552-0769	www.eac.edu	2-year, Public	Less than one year certificate;One but less than two years certificate;Associate's degree	Town: Remote	Yes	6379	6379	36%	3%	Fall 2011	$6,896	-	104577	00107300
Information Science/Studies	Associates	Eastern Gateway Community College	4000 Sunset Blvd, Steubenville, Ohio 43952-3598	www.egcc.edu	2-year, Public	Less than one year certificate;One but less than two years certificate;Associate's degree	City: Small	No	3182	3182	24%	32%	Fall 2011	$3,237	-	203331	00727500
Information Science/Studies	Associates	Elizabethtown College School of Continuing and Professional Studies	One Alpha Drive, Elizabethtown, Pennsylvania 17022	www.etowndegrees.com/	4-year, Private not-for-profit	Associate's degree;Bachelor's degree;Postbaccalaureate certificate;Master's degree	Suburb: Large	No	422	346	NA	NA	Fall 2008	NA	-	480134	00326200
Information Science/Studies	Associates	Fayetteville Technical Community College	2201 Hull Rd, Fayetteville, North Carolina 28303-0236	www.faytechcc.edu	2-year, Public	Less than one year certificate;One but less than two years certificate;Associate's degree;Two but less than 4 years certificate	City: Midsize	No	12103	12103	6%	11%	Fall 2011	$3,863	-	198534	00764000
Information Science/Studies	Associates	Finger Lakes Community College	3325 Marvin Sands Drive, Canandaigua, New York 14424-8395	www.flcc.edu	2-year, Public	One but less than two years certificate;Associate's degree	Rural: Fringe	No	6793	6793	27%	19%	Fall 2011	$9,545	-	191199	00753200
Information Science/Studies	Associates	Florida Institute of Technology-Online	150 West University Blvd, Melbourne, Florida 32901	www.fit.edu	4-year, Private not-for-profit	Associate's degree;Bachelor's degree;Master's degree	City: Small	No	3182	2066	NA	NA	Fall 2008	NA	-	480569	00146900
Information Science/Studies	Associates	Forsyth Technical Community College	2100 Silas Creek Pky, Winston Salem, North Carolina 27103-5197	www.forsythtech.edu/	2-year, Public	Less than one year certificate;One but less than two years certificate;Associate's degree	City: Midsize	No	9148	9148	11%	17%	Fall 2011	$4,549	-	198552	00531700
Information Science/Studies	Associates	Frontier Community College	Frontier Drive, Fairfield, Illinois 62837	www.iecc.edu/fcc	2-year, Public	Less than one year certificate;One but less than two years certificate;Associate's degree	Town: Remote	No	2218	2218	72%	17%	Fall 2011	$1,657	-	403469	02074400
Information Science/Studies	Associates	Fulton-Montgomery Community College	2805 State Hwy 67, Johnstown, New York 12095-3790	fmcc.edu	2-year, Public	One but less than two years certificate;Associate's degree	Rural: Fringe	Yes	2589	2589	27%	18%	Fall 2011	$7,944	-	191302	00286700
Information Science/Studies	Associates	Gaston College	201 Hwy 321 S, Dallas, North Carolina 28034	www.gaston.edu	2-year, Public	Less than one year certificate;One but less than two years certificate;Associate's degree	Suburb: Midsize	No	5777	5777	21%	18%	Fall 2011	$10,580	-	198570	00297300
Information Science/Studies	Associates	Genesee Community College	One College Rd, Batavia, New York 14020	www.genesee.edu	2-year, Public	Less than one year certificate;One but less than two years certificate;Associate's degree	Town: Distant	Yes	6876	6876	25%	22%	Fall 2011	$6,272	-	191339	00678200
Information Science/Studies	Associates	Guilford Technical Community College	601 High Point Rd., Jamestown, North Carolina 27282	www.gtcc.edu	2-year, Public	Less than one year certificate;One but less than two years certificate;Associate's degree	Suburb: Midsize	No	12430	12430	12%	28%	Fall 2011	$11,922	-	198622	00483800
Information Science/Studies	Associates	Hudson Valley Community College	80 Vandenburgh Ave, Troy, New York 12180	www.hvcc.edu	2-year, Public	One but less than two years certificate;Associate's degree	City: Small	No	12177	12177	27%	14%	Fall 2011	$8,829	-	191719	00286800
Information Science/Studies	Associates	Immaculata University	1145 King Rd, Immaculata, Pennsylvania 19345-0702	www.immaculata.edu	4-year, Private not-for-profit	Associate's degree;Bachelor's degree;Master's degree;Doctor's degree - research/scholarship;Doctor's degree - professional practice	Suburb: Large	Yes	3299	2138	61%	33%	Fall 2008	$30,947	-	213011	00327600
Information Science/Studies	Associates	Instituto Tecnologico de Puerto Rico-Recinto de Guayama	Urb. Vives, Final, Guayama, Puerto Rico 00785-0000	www.de.gobierno.pr/	2-year, Public	Associate's degree	City: Small	No	662	662	47%	NA	Fall 2011	$1,056	-	242556	02241904
Information Science/Studies	Associates	Instituto Tecnologico de Puerto Rico-Recinto de Manati	State Road 2 Km.47.3, Manati, Puerto Rico 00674-1091	itec.pr/ITPR-Joomla/	2-year, Public	Associate's degree	Suburb: Large	No	713	713	72%	NA	Fall 2011	$3,296	-	242042	02241910
Information Science/Studies	Associates	Instituto Tecnologico de Puerto Rico-Recinto de Ponce	4820 Candido Hoyos Urb. Perla Del Sur, Ponce, Puerto Rico 00717-0306	itec.pr	2-year, Public	Associate's degree	City: Midsize	No	601	601	39%	NA	Fall 2011	NA	-	242565	02241908
Information Science/Studies	Associates	Instituto Tecnologico de Puerto Rico-Recinto de San Juan	Calle Alegria Final Urb las Virtudes, San Juan, Puerto Rico 00924		2-year, Public	Associate's degree	City: Large	No	632	632	47%	NA	Fall 2011	$47	-	242583	02241907
Information Science/Studies	Associates	Isothermal Community College	286 ICC Loop Road, Spindale, North Carolina 28160-0804	www.isothermal.edu	2-year, Public	Less than one year certificate;One but less than two years certificate;Associate's degree	Town: Distant	No	2057	2057	8%	11%	Fall 2011	$6,381	-	198710	00293400
Information Science/Studies	Associates	ITI Technical College	13944 Airline Hwy, Baton Rouge, Louisiana 70817	www.iticollege.edu	2-year, Private for-profit	Less than one year certificate;One but less than two years certificate;Associate's degree	Suburb: Large	No	691	691	69%	NA	Fall 2011	$17,126	-	159197	02166200
Information Science/Studies	Associates	Ivy Tech Community College	50 W. Fall Creek Parkway N. Drive, Indianapolis, Indiana 46208-5752	www.ivytech.edu	2-year, Public	Less than one year certificate;One but less than two years certificate;Associate's degree	City: Large	No	91179	91179	8%	17%	Fall 2011	$6,729	-	150987	00991700
Information Science/Studies	Associates	Jamestown Community College	525 Falconer St, Jamestown, New York 14701	www.sunyjcc.edu	2-year, Public	One but less than two years certificate;Associate's degree	Town: Distant	Yes	5065	5065	30%	15%	Fall 2011	$8,230	-	191986	00286900
Information Science/Studies	Associates	Jefferson Community College	1220 Coffeen St, Watertown, New York 13601-1897	www.sunyjefferson.edu	2-year, Public	Less than one year certificate;One but less than two years certificate;Associate's degree	City: Small	Yes	3880	3880	27%	19%	Fall 2011	$5,677	-	192022	00287000
Information Science/Studies	Associates	Johnson & Wales University-Providence	8 Abbott Park Place, Providence, Rhode Island 02903-3703	www.jwu.edu	4-year, Private not-for-profit	One but less than two years certificate;Associate's degree;Bachelor's degree;Master's degree;Post-master's certificate;Doctor's degree - research/scholarship	City: Midsize	Yes	9955	9173	57%	1%	Fall 2008	$25,972	-	217235	00340400
Information Science/Studies	Associates	Kaskaskia College	27210 College Rd, Centralia, Illinois 62801	www.kaskaskia.edu	2-year, Public	Less than one year certificate;One but less than two years certificate;Associate's degree	Rural: Fringe	No	4906	4906	49%	14%	Fall 2011	$5,189	-	146366	00170100
Information Science/Studies	Associates	Lake Land College	5001 Lake Land Blvd, Mattoon, Illinois 61938	www.lakeland.cc.il.us	2-year, Public	Less than one year certificate;One but less than two years certificate;Associate's degree	Town: Distant	No	5593	5593	34%	20%	Fall 2011	$5,149	-	146506	00764400
Information Science/Studies	Associates	Laurel Technical Institute	200 Sterling Ave, Sharon, Pennsylvania 16146	www.laurel.edu	2-year, Private for-profit	Less than one year certificate;One but less than two years certificate;Associate's degree	Suburb: Large	No	157	157	66%	NA	Fall 2011	$8,584	-	215992	02092500
Information Science/Studies	Associates	Manchester Community College	Great Path, Manchester, Connecticut 06040	www.manchestercc.edu/	2-year, Public	Less than one year certificate;One but less than two years certificate;Associate's degree	Suburb: Large	No	7300	7300	16%	25%	Fall 2011	$4,317	-	129695	00139200
Information Science/Studies	Associates	Martin Community College	1161 Kehukee Pk Rd, Williamston, North Carolina 27892-9988	www.martincc.edu	2-year, Public	Less than one year certificate;One but less than two years certificate;Associate's degree	Rural: Fringe	No	477	477	6%	NA	Fall 2011	$6,690	-	198905	00798800
Information Science/Studies	Associates	McDowell Technical Community College	54 College Drive, Marion, North Carolina 28752-8728	www.mcdowelltech.edu	2-year, Public	Less than one year certificate;One but less than two years certificate;Associate's degree	Rural: Fringe	No	1056	1056	13%	15%	Fall 2011	$4,971	-	198923	00808500
Information Science/Studies	Associates	Metropolitan Community College Area	30 & Fort Street, Omaha, Nebraska 68111-1610	www.mccneb.edu	2-year, Public	Less than one year certificate;One but less than two years certificate;Associate's degree	City: Large	No	14675	14675	14%	25%	Fall 2011	$6,333	-	181303	01258600
Information Science/Studies	Associates	Mid Michigan Community College	1375 S Clare Ave, Harrison, Michigan 48625-9447	www.midmich.edu	2-year, Public	Less than one year certificate;One but less than two years certificate;Associate's degree	Rural: Fringe	No	4422	4422	12%	22%	Fall 2011	$5,464	-	171155	00676800
Information Science/Studies	Associates	Mitchell Community College	500 W Broad Street, Statesville, North Carolina 28677-5293	www.mitchellcc.edu	2-year, Public	Less than one year certificate;One but less than two years certificate;Associate's degree	Suburb: Large	No	3106	3106	20%	9%	Fall 2011	$8,752	-	198987	00294700
Information Science/Studies	Associates	Monroe Community College	1000 E Henrietta Rd, Rochester, New York 14623	www.monroecc.edu/	2-year, Public	Less than one year certificate;One but less than two years certificate;Associate's degree	Suburb: Large	Yes	15335	15335	24%	20%	Fall 2011	$6,795	-	193326	00287200
Information Science/Studies	Associates	Montana State University-Northern	300 W 11th St, Havre, Montana 59501	www.msun.edu	4-year, Public	One but less than two years certificate;Associate's degree;Bachelor's degree;Master's degree	Town: Remote	Yes	1230	1148	26%	NA	Fall 2008	$11,513	-	180522	00253300
Information Science/Studies	Associates	Morrisville State College	80 Eaton Street, Morrisville, New York 13408	www.morrisville.edu	4-year, primarily associate's, Public	One but less than two years certificate;Associate's degree;Bachelor's degree	Rural: Distant	Yes	2910	2910	28%	30%	Fall 2008	$15,084	-	196051	00285900
Information Science/Studies	Associates	Murray State College	One Murray Campus, Tishomingo, Oklahoma 73460	www.mscok.edu	2-year, Public	Associate's degree	Rural: Distant	Yes	2473	2473	21%	16%	Fall 2011	$9,745	-	207236	00315800
Information Science/Studies	Associates	Nash Community College	522 N. Old Carriage Road, Rocky Mount, North Carolina 27804	www.nashcc.edu	2-year, Public	Less than one year certificate;One but less than two years certificate;Associate's degree	Rural: Fringe	No	3537	3537	8%	NA	Fall 2011	$7,297	-	199087	00855700
Information Science/Studies	Associates	Newman University	3100 McCormick Ave, Wichita, Kansas 67213-2097	www.newmanu.edu	4-year, Private not-for-profit	Associate's degree;Bachelor's degree;Master's degree	City: Large	Yes	3687	2732	48%	NA	Fall 2008	$14,178	-	155335	00193900
Information Science/Studies	Associates	Niagara County Community College	3111 Saunders Settlement Rd, Sanborn, New York 14132	www.niagaracc.suny.edu	2-year, Public	One but less than two years certificate;Associate's degree	Rural: Fringe	No	6478	6478	24%	14%	Fall 2011	$5,578	-	193946	00287400
Information Science/Studies	Associates	North Central Texas College	1525 W California Street, Gainesville, Texas 76240-4699	www.nctc.edu	2-year, Public	One but less than two years certificate;Associate's degree	Town: Distant	Yes	10169	10169	14%	22%	Fall 2011	$4,940	-	224110	00355800
Information Science/Studies	Associates	Northwest Mississippi Community College	4975 Hwy 51 N, Senatobia, Mississippi 38668-1714	www.northwestms.edu	2-year, Public	Less than one year certificate;One but less than two years certificate;Associate's degree	Town: Distant	Yes	7559	7559	19%	15%	Fall 2011	$6,092	-	176178	00242700
Information Science/Studies	Associates	Nunez Community College	3710 Paris Rd, Chalmette, Louisiana 70043	www.nunez.edu	2-year, Public	Less than one year certificate;One but less than two years certificate;Associate's degree	Suburb: Large	No	2617	2617	12%	NA	Fall 2011	$8,770	-	158884	02166100
Information Science/Studies	Associates	Oklahoma Wesleyan University	2201 Silver Lake Rd, Bartlesville, Oklahoma 74006-6299	www.okwu.edu	4-year, Private not-for-profit	Associate's degree;Bachelor's degree;Master's degree	Town: Distant	Yes	1345	1205	37%	NA	Fall 2008	$21,742	-	206835	00315100
Information Science/Studies	Associates	Onondaga Community College	4585 West Seneca Turnpike, Syracuse, New York 13215-4585	www.sunyocc.edu	2-year, Public	One but less than two years certificate;Associate's degree	Suburb: Large	Yes	12271	12271	21%	15%	Fall 2011	$8,011	-	194222	00287500
Information Science/Studies	Associates	Orange County Community College	115 South St, Middletown, New York 10940	www.sunyorange.edu/	2-year, Public	One but less than two years certificate;Associate's degree	Suburb: Small	No	6951	6951	18%	13%	Fall 2011	$5,225	-	194240	00287600
Information Science/Studies	Associates	Palo Alto College	1400 W Villaret Blvd, San Antonio, Texas 78224-2499	alamo.edu/pac/	2-year, Public	Less than one year certificate;One but less than two years certificate;Associate's degree;Two but less than 4 years certificate	City: Large	No	8376	8376	16%	15%	Fall 2011	$5,604	-	246354	02341300
Information Science/Studies	Associates	Panola College	1109 W Panola Street, Carthage, Texas 75633-2397	www.panola.edu	2-year, Public	Less than one year certificate;One but less than two years certificate;Associate's degree	Town: Distant	Yes	2564	2564	20%	17%	Fall 2011	$9,263	-	227386	00360000
Information Science/Studies	Associates	Pennsylvania State University-Main Campus	201 Old Main, University Park, Pennsylvania 16802	www.psu.edu/	4-year, Public	Less than one year certificate;One but less than two years certificate;Associate's degree;Bachelor's degree;Postbaccalaureate certificate;Master's degree;Doctor's degree - research/scholarship;Doctor's degree - professional practice	City: Small	Yes	47040	40541	86%	NA	Fall 2008	$24,220	-	214777	00332900
Information Science/Studies	Associates	Pennsylvania State University-Penn State Beaver	100 University Drive, Monaca, Pennsylvania 15061	www.beaver.psu.edu/	4-year, Public	Less than one year certificate;One but less than two years certificate;Bachelor's degree;Postbaccalaureate certificate	Suburb: Large	Yes	720	720	41%	NA	Fall 2008	$16,583	-	214698	00332904
Information Science/Studies	Associates	Pennsylvania State University-Penn State Berks	Tulpehocken Road, Reading, Pennsylvania 19610	www.berks.psu.edu/	4-year, Public	Less than one year certificate;One but less than two years certificate;Associate's degree;Bachelor's degree	Suburb: Large	Yes	2839	2828	57%	NA	Fall 2008	$20,466	-	214704	00332906
Information Science/Studies	Associates	Pennsylvania State University-Penn State DuBois	1 College Place, DuBois, Pennsylvania 15801	www.dubois.psu.edu/	4-year, primarily associate's, Public	Less than one year certificate;One but less than two years certificate;Associate's degree;Bachelor's degree	Town: Remote	No	615	615	52%	NA	Fall 2008	$14,338	-	214740	00332907
Information Science/Studies	Associates	Pennsylvania State University-Penn State Fayette- Eberly	2201 University Drive, Lemont Furnace, Pennsylvania 15456	www.fe.psu.edu/	4-year, primarily associate's, Public	Less than one year certificate;One but less than two years certificate;Associate's degree;Bachelor's degree	Rural: Fringe	No	717	717	47%	NA	Fall 2008	$12,881	-	214759	00332908
Information Science/Studies	Associates	Pennsylvania State University-Penn State Hazleton	76 University Drive, Hazleton, Pennsylvania 18202	hazleton.psu.edu/	4-year, primarily associate's, Public	Less than one year certificate;One but less than two years certificate;Associate's degree;Bachelor's degree	Suburb: Small	Yes	850	850	54%	NA	Fall 2008	$18,442	-	214768	00332909
Information Science/Studies	Associates	Pennsylvania State University-Penn State Mont Alto	1 Campus Drive, Mont Alto, Pennsylvania 17237	www.montalto.psu.edu/	4-year, primarily associate's, Public	Less than one year certificate;One but less than two years certificate;Associate's degree;Bachelor's degree	Town: Fringe	Yes	940	940	52%	NA	Fall 2008	$18,874	-	214795	00332911
Information Science/Studies	Associates	Pennsylvania State University-Penn State New Kensington	3550 Seventh Street Road, New Kensington, Pennsylvania 15068	nk.psu.edu/	4-year, Public	Less than one year certificate;One but less than two years certificate;Associate's degree;Bachelor's degree;Master's degree	Rural: Fringe	No	665	665	48%	NA	Fall 2008	$12,740	-	214625	00332912
Information Science/Studies	Associates	Pennsylvania State University-Penn State Schuylkill	200 University Drive, Schuylkill Haven, Pennsylvania 17972	www.sl.psu.edu	4-year, Public	Less than one year certificate;One but less than two years certificate;Associate's degree;Bachelor's degree	Town: Distant	Yes	796	796	43%	NA	Fall 2008	$15,232	-	214810	00332914
Information Science/Studies	Associates	Pennsylvania State University-Penn State Shenango	147 Shenango Avenue, Sharon, Pennsylvania 16146	shenango.psu.edu	4-year, primarily associate's, Public	Less than one year certificate;One but less than two years certificate;Associate's degree;Bachelor's degree	Suburb: Large	No	539	539	32%	NA	Fall 2008	$14,924	-	214634	00332916
Information Science/Studies	Associates	Pennsylvania State University-Penn State Wilkes-Barre	Old Route 115, Lehman, Pennsylvania 18627	wb.psu.edu/	4-year, Public	Less than one year certificate;One but less than two years certificate;Associate's degree;Bachelor's degree;Postbaccalaureate certificate	Rural: Fringe	No	545	536	49%	NA	Fall 2008	$14,303	-	214643	00332917
Information Science/Studies	Associates	Pennsylvania State University-Penn State Worthington Scranton	120 Ridge View Drive, Dunmore, Pennsylvania 18512	worthingtonscranton.psu.edu/	4-year, Public	Less than one year certificate;One but less than two years certificate;Associate's degree;Bachelor's degree	Suburb: Large	No	1126	1126	46%	NA	Fall 2008	$12,453	-	214652	00332915
Information Science/Studies	Associates	Pennsylvania State University-Penn State York	1031 Edgecomb Avenue, York, Pennsylvania 17403	www.yk.psu.edu/	4-year, Public	Less than one year certificate;One but less than two years certificate;Associate's degree;Bachelor's degree;Master's degree	Suburb: Midsize	No	1172	1126	47%	NA	Fall 2008	$13,097	-	214829	00332918
Information Science/Studies	Associates	Pennsylvania State University-World Campus	128 Outreach Building, University Park, Pennsylvania 16802	www.worldcampus.psu.edu/	4-year, Public	Less than one year certificate;Associate's degree;Bachelor's degree;Postbaccalaureate certificate;Master's degree;Doctor's degree - professional practice	Rural: Fringe	No	10805	6245	25%	NA	Fall 2008	$22,017	-	479956	00332900
Information Science/Studies	Associates	Piedmont Community College	1715 College Dr, Roxboro, North Carolina 27573	www.piedmontcc.edu	2-year, Public	Less than one year certificate;One but less than two years certificate;Associate's degree	Rural: Fringe	No	1475	1475	14%	20%	Fall 2011	$8,671	-	199324	00964600
Information Science/Studies	Associates	Pikes Peak Community College	5675 S Academy Blvd, Colorado Springs, Colorado 80906-5498	www.ppcc.edu	2-year, Public	Less than one year certificate;One but less than two years certificate;Associate's degree	Suburb: Large	No	13947	13947	12%	17%	Fall 2011	$9,854	-	127820	00889600
Information Science/Studies	Associates	Pitt Community College	1986 Pitt Tech Road, Winterville, North Carolina 28590	www.pittcc.edu	2-year, Public	Less than one year certificate;One but less than two years certificate;Associate's degree	Suburb: Midsize	No	8872	8872	12%	33%	Fall 2011	$5,015	-	199333	00406200
Information Science/Studies	Associates	Potomac State College of West Virginia University	101 Fort Ave, Keyser, West Virginia 26726	www.potomacstatecollege.edu	4-year, primarily associate's, Public	Associate's degree;Bachelor's degree	Town: Distant	Yes	1540	1540	20%	26%	Fall 2008	$7,020	-	237701	00382711
Information Science/Studies	Associates	Rich Mountain Community College	1100 College Dr, Mena, Arkansas 71953	www.rmcc.edu	2-year, Public	Less than one year certificate;One but less than two years certificate;Associate's degree	Town: Remote	No	1005	1005	24%	6%	Fall 2011	$6,190	-	107743	02111100
Information Science/Studies	Associates	Roanoke-Chowan Community College	109 Community College Rd, Ahoskie, North Carolina 27910-9522	www.roanokechowan.edu	2-year, Public	Less than one year certificate;One but less than two years certificate;Associate's degree	Rural: Fringe	No	1007	1007	13%	NA	Fall 2011	$2,084	-	199467	00861300
Information Science/Studies	Associates	Rochester Community and Technical College	851 30th Ave SE, Rochester, Minnesota 55904-4999	www.rctc.edu/	2-year, Public	Less than one year certificate;One but less than two years certificate;Associate's degree;Two but less than 4 years certificate	City: Midsize	No	5894	5894	20%	29%	Fall 2011	$14,856	-	174738	00237300
Information Science/Studies	Associates	Rockland Community College	145 College Rd, Suffern, New York 10901-3699	www.sunyrockland.edu/	2-year, Public	One but less than two years certificate;Associate's degree	Suburb: Large	No	7520	7520	27%	20%	Fall 2011	$9,130	-	195058	00287700
Information Science/Studies	Associates	Rowan-Cabarrus Community College	1333 Jake Alexander Blvd, Salisbury, North Carolina 28146-1595	www.rccc.edu/	2-year, Public	Less than one year certificate;One but less than two years certificate;Associate's degree	Suburb: Midsize	No	6420	6420	13%	NA	Fall 2011	$5,636	-	199494	00575400
Information Science/Studies	Associates	Schenectady County Community College	78 Washington Avenue, Schenectady, New York 12305	www.sunysccc.edu	2-year, Public	One but less than two years certificate;Associate's degree	City: Small	No	6497	6497	14%	15%	Fall 2011	$3,904	-	195322	00678500
Information Science/Studies	Associates	Sheridan College	3059 S Coffeen Ave, Sheridan, Wyoming 82801	www.sheridan.edu	2-year, Public	Less than one year certificate;One but less than two years certificate;Associate's degree	Town: Remote	Yes	4374	4374	29%	17%	Fall 2011	$7,438	-	240666	00393000
Information Science/Studies	Associates	South Piedmont Community College	680 Highway 74 West, Polkton, North Carolina 28135	www.spcc.edu	2-year, Public	Less than one year certificate;One but less than two years certificate;Associate's degree	Rural: Distant	No	2658	2658	7%	32%	Fall 2011	$5,808	-	197850	00798500
Information Science/Studies	Associates	South Suburban College	15800 South State Street, South Holland, Illinois 60473-1200	www.ssc.edu/	2-year, Public	Less than one year certificate;One but less than two years certificate;Associate's degree	Suburb: Large	No	4329	4329	18%	49%	Fall 2011	$4,390	-	149365	00176900
Information Science/Studies	Associates	South University-Austin	7700 W Palmer Ln Bldg A Ste A100, Austin, Texas 78729	www.southuniversity.edu	4-year, Private for-profit	Associate's degree;Bachelor's degree;Master's degree	Rural: Fringe	No	249	218	NA	NA	Fall 2008	$27,001	-	480073	01303915
Information Science/Studies	Associates	South University-Columbia	9 Science Court, Columbia, South Carolina 29203	www.southuniversity.edu	4-year, Private for-profit	Associate's degree;Bachelor's degree;Master's degree;Doctor's degree - professional practice	Suburb: Large	No	1464	1022	15%	NA	Fall 2008	$22,003	-	251312	01303907
Information Science/Studies	Associates	South University-Montgomery	5355 Vaughn Rd, Montgomery, Alabama 36116	southuniversity.edu	4-year, Private for-profit	Associate's degree;Bachelor's degree;Master's degree;Post-master's certificate;Doctor's degree - professional practice	City: Midsize	No	624	523	9%	NA	Fall 2008	$23,074	-	101116	01303906
Information Science/Studies	Associates	South University–Richmond	2151 Old Brick Rd, Glen Allen, Virginia 23060	www.southuniversity.edu	4-year, Private for-profit	Associate's degree;Bachelor's degree;Master's degree;Post-master's certificate	Suburb: Large	No	766	668	NA	NA	Fall 2008	$23,128	-	459259	01303910
Information Science/Studies	Associates	South University-Savannah	709 Mall Blvd, Savannah, Georgia 31406	www.southuniversity.edu	4-year, Private for-profit	Associate's degree;Bachelor's degree;Master's degree;Post-master's certificate;Doctor's degree - research/scholarship;Doctor's degree - professional practice	City: Midsize	Yes	1490	764	9%	1%	Fall 2008	$22,955	-	139579	01303900
Information Science/Studies	Associates	South University–Savannah Online	709 Mall Blvd, Savannah, Georgia 31406	online.southuniversity.edu/	4-year, Private for-profit	Associate's degree;Bachelor's degree;Master's degree;Post-master's certificate;Doctor's degree - professional practice	City: Midsize	No	11522	8833	2%	NA	Fall 2008	$21,347	-	475121	01303900
Information Science/Studies	Associates	South University–Virginia Beach	301 Bendix Rd, Ste 100, Virginia Beach, Virginia 23452	www.southuniversity.edu	4-year, Private for-profit	Associate's degree;Bachelor's degree;Master's degree	City: Large	No	857	724	NA	NA	Fall 2008	$24,500	-	459268	01303911
Information Science/Studies	Associates	Southwestern Community College	447 College Dr, Sylva, North Carolina 28779	www.southwesterncc.edu	2-year, Public	Less than one year certificate;One but less than two years certificate;Associate's degree	Town: Distant	No	2528	2528	29%	NA	Fall 2011	$8,149	-	199731	00846600
Information Science/Studies	Associates	Suffolk County Community College	533 College Rd, Selden, New York 11784-2899	www3.sunysuffolk.edu	2-year, Public	One but less than two years certificate;Associate's degree	Suburb: Large	No	26600	26600	20%	8%	Fall 2011	$7,027	-	366395	00287800
Information Science/Studies	Associates	Sullivan County Community College	112 College Road, Loch Sheldrake, New York 12759-5151	www.sunysullivan.edu/	2-year, Public	One but less than two years certificate;Associate's degree	Rural: Distant	Yes	1643	1643	19%	26%	Fall 2011	$7,304	-	195988	00287900
Information Science/Studies	Associates	SUNY Broome Community College	907 Upper Front St, Binghamton, New York 13905	WWW.SUNYBROOME.EDU	2-year, Public	One but less than two years certificate;Associate's degree	Suburb: Midsize	Yes	5944	5944	27%	14%	Fall 2011	$5,163	-	189547	00286200
Information Science/Studies	Associates	SUNY College of Agriculture and Technology at Cobleskill	Rt 7, Cobleskill, New York 12043	www.cobleskill.edu/	4-year, primarily associate's, Public	Less than one year certificate;Associate's degree;Bachelor's degree	Town: Distant	Yes	2535	2535	36%	30%	Fall 2008	$14,441	-	196033	00285600
Information Science/Studies	Associates	SUNY College of Technology at Alfred	10 Upper College Drive, Alfred, New York 14802	www.alfredstate.edu	4-year, primarily associate's, Public	One but less than two years certificate;Associate's degree;Bachelor's degree	Town: Remote	Yes	3661	3661	48%	22%	Fall 2008	$14,378	-	196006	00285400
Information Science/Studies	Associates	SUNY College of Technology at Canton	34 Cornell Drive, Canton, New York 13617-1098	www.canton.edu	4-year, primarily associate's, Public	One but less than two years certificate;Associate's degree;Bachelor's degree	Town: Remote	Yes	3278	3278	29%	32%	Fall 2008	$11,884	-	196015	00285500
Information Science/Studies	Associates	SUNY College of Technology at Delhi	2 Main Street, Delhi, New York 13753-1100	www.delhi.edu	4-year, primarily associate's, Public	One but less than two years certificate;Associate's degree;Bachelor's degree;Master's degree	Town: Remote	Yes	3598	3596	39%	30%	Fall 2008	$13,043	-	196024	00285700
Information Science/Studies	Associates	SUNY Westchester Community College	75 Grasslands Road, Valhalla, New York 10595	www.sunywcc.edu	2-year, Public	One but less than two years certificate;Associate's degree	Suburb: Large	No	13916	13916	12%	20%	Fall 2011	$6,027	-	197294	00288100
Information Science/Studies	Associates	Surry Community College	630 S. Main St., Dobson, North Carolina 27017-8432	www.surry.edu	2-year, Public	Less than one year certificate;One but less than two years certificate;Associate's degree	Rural: Distant	No	3294	3294	23%	22%	Fall 2011	$8,994	-	199768	00297000
Information Science/Studies	Associates	Texas State Technical College-Marshall	2650 E End Blvd, South, Marshall, Texas 75672	www.marshall.tstc.edu	2-year, Public	Less than one year certificate;One but less than two years certificate;Associate's degree	Town: Distant	Yes	858	858	31%	9%	Fall 2011	$13,751	-	408394	03396500
Information Science/Studies	Associates	Tompkins Cortland Community College	170 North St, Dryden, New York 13053-0139	www.TC3.edu	2-year, Public	One but less than two years certificate;Associate's degree	Town: Fringe	Yes	5559	5559	23%	30%	Fall 2011	$9,340	-	196565	00678800
Information Science/Studies	Associates	Tri-County Community College	21 Campus Circle, Murphy, North Carolina 28906	www.tricountycc.edu	2-year, Public	Less than one year certificate;One but less than two years certificate;Associate's degree	Rural: Remote	No	1273	1273	11%	18%	Fall 2011	$7,690	-	199795	00943000
Information Science/Studies	Associates	Triton College	2000 5th Ave, River Grove, Illinois 60171-1995	www.triton.edu	2-year, Public	Less than one year certificate;One but less than two years certificate;Associate's degree	Suburb: Large	No	11577	11577	12%	26%	Fall 2011	$4,977	-	149532	00177300
Information Science/Studies	Associates	University of Advancing Technology	2625 W Baseline Rd, Tempe, Arizona 85283	www.uat.edu	4-year, Private for-profit	Associate's degree;Bachelor's degree;Master's degree	City: Midsize	Yes	819	784	31%	13%	Fall 2008	$28,045	-	363934	02559000
Information Science/Studies	Associates	University of Cincinnati-Blue Ash College	9555 Plainfield Rd, Blue Ash, Ohio 45236-1096	www.ucblueash.edu/	4-year, primarily associate's, Public	Less than one year certificate;One but less than two years certificate;Associate's degree;Bachelor's degree;Postbaccalaureate certificate	Suburb: Large	No	5024	5024	21%	28%	Fall 2008	$11,910	-	201955	00312502
Information Science/Studies	Associates	University of Cincinnati-Clermont College	4200 Clermont College Dr, Batavia, Ohio 45103	www.ucclermont.edu/	4-year, primarily associate's, Public	Less than one year certificate;One but less than two years certificate;Associate's degree;Bachelor's degree;Postbaccalaureate certificate	Suburb: Large	No	3246	3246	24%	17%	Fall 2008	$12,763	-	201946	00312501
Information Science/Studies	Associates	University of Cincinnati-Main Campus	2624 Clifton Avenue, Cincinnati, Ohio 45221-0063	www.uc.edu	4-year, Public	Less than one year certificate;One but less than two years certificate;Associate's degree;Two but less than 4 years certificate;Bachelor's degree;Postbaccalaureate certificate;Master's degree;Post-master's certificate;Doctor's degree - research/scholarship;Doctor's degree - professional practice	City: Large	Yes	35313	24300	60%	23%	Fall 2008	$19,739	-	201885	00312500
Information Science/Studies	Associates	University of Massachusetts-Lowell	1 University Ave, Lowell, Massachusetts 01854-5104	www.uml.edu	4-year, Public	Less than one year certificate;Associate's degree;Bachelor's degree;Postbaccalaureate certificate;Master's degree;Post-master's certificate;Doctor's degree - research/scholarship;Doctor's degree - professional practice	Suburb: Large	Yes	17179	12983	54%	NA	Fall 2008	$15,965	-	166513	00216100
Information Science/Studies	Associates	University of Pittsburgh-Bradford	300 Campus Drive, Bradford, Pennsylvania 16701	www.upb.pitt.edu/	4-year, Public	Associate's degree;Bachelor's degree	Town: Remote	Yes	1499	1499	52%	NA	Fall 2008	$16,239	-	215266	00337903
Information Science/Studies	Associates	University of Scranton	800 Linden Street, Scranton, Pennsylvania 18510-4629	www.scranton.edu	4-year, Private not-for-profit	One but less than two years certificate;Associate's degree;Bachelor's degree;Postbaccalaureate certificate;Master's degree;Post-master's certificate;Doctor's degree - professional practice	City: Small	Yes	5589	3998	80%	NA	Fall 2008	$33,353	-	215929	00338400
Information Science/Studies	Associates	University of Toledo	2801 W Bancroft, Toledo, Ohio 43606-3390	www.utoledo.edu/	4-year, Public	Less than one year certificate;One but less than two years certificate;Associate's degree;Bachelor's degree;Postbaccalaureate certificate;Master's degree;Post-master's certificate;Doctor's degree - research/scholarship;Doctor's degree - professional practice;Doctor's degree - other	City: Large	Yes	20626	16090	44%	NA	Fall 2008	$14,722	-	206084	00313100
Information Science/Studies	Associates	Utica School of Commerce	201 Bleecker St, Utica, New York 13501	www.uscny.edu	2-year, Private for-profit	One but less than two years certificate;Associate's degree	City: Small	No	282	282	36%	NA	Fall 2011	$15,078	-	197081	00907700
Information Science/Studies	Associates	Vance-Granville Community College	200 Community College Road, Henderson, North Carolina 27537	www.vgcc.edu	2-year, Public	Less than one year certificate;One but less than two years certificate;Associate's degree	Town: Distant	No	4025	4025	23%	17%	Fall 2011	$6,061	-	199838	00990300
Information Science/Studies	Associates	Wake Technical Community College	9101 Fayetteville Road, Raleigh, North Carolina 27603-5696	www.waketech.edu/	2-year, Public	Less than one year certificate;One but less than two years certificate;Associate's degree	Suburb: Large	No	21384	21384	14%	32%	Fall 2011	$9,129	-	199856	00484400
Information Science/Studies	Associates	Widener University-Delaware Campus	4601 Concord Pike, Wilmington, Delaware 19803	www.widener.edu	4-year, Private not-for-profit	Associate's degree;Bachelor's degree;Master's degree;Doctor's degree - research/scholarship;Doctor's degree - professional practice	Suburb: Large	No	742	93	80%	NA	Fall 2008	$17,721	-	244190	00331301
Information Science/Studies	Associates	Widener University-Main Campus	One University Place, Chester, Pennsylvania 19013-5792	www.widener.edu	4-year, Private not-for-profit	Associate's degree;Bachelor's degree;Postbaccalaureate certificate;Master's degree;Post-master's certificate;Doctor's degree - research/scholarship;Doctor's degree - professional practice	Suburb: Large	Yes	4912	3350	53%	26%	Fall 2008	$27,473	-	216852	00331300
Information Science/Studies	Associates	William Rainey Harper College	1200 W Algonquin Rd, Palatine, Illinois 60067-7398	www.harpercollege.edu	2-year, Public	Less than one year certificate;One but less than two years certificate;Associate's degree	Suburb: Large	No	14957	14957	21%	29%	Fall 2011	$7,161	-	149842	00396100
Information Science/Studies	Associates	Wright State University-Lake Campus	7600 St. Rt. 703, Celina, Ohio 45822-2952	lake.wright.edu	4-year, Public	Associate's degree;Bachelor's degree;Master's degree	Rural: Fringe	Yes	1147	1115	42%	NA	Fall 2008	$7,455	-	206613	00307801
Information Science/Studies	Associates	Wright State University-Main Campus	3640 Colonel Glenn Highway, Dayton, Ohio 45435-0001	www.wright.edu	4-year, Public	One but less than two years certificate;Associate's degree;Bachelor's degree;Master's degree;Post-master's certificate;Doctor's degree - research/scholarship;Doctor's degree - professional practice	Suburb: Large	Yes	16842	12682	39%	NA	Fall 2008	$13,868	-	206604	00307800
Information Science/Studies	Associates	Zane State College	1555 Newark Rd, Zanesville, Ohio 43701-2626	www.zanestate.edu	2-year, Public	Less than one year certificate;One but less than two years certificate;Associate's degree	Town: Distant	No	4009	4009	30%	3%	Fall 2011	$8,287	-	204255	00813300
		* Cohort Year represents the year for which students began their studies and applies to Graduation and Transfer Out Rates.
		** Net Price is Average Net Price for 2013-2014 generated for full-time beginning undergraduate students who were awarded grant or scholarship aid from federal, state or local governments, or the institution. For public institutions only students paying the in-state or in-district rate are included. For institutions that charge students by program, net price is generated for the institution’s lar…
		NA (Not applicable) - Graduation rate, transfer-out rate and the net price are not applicable to institutions that do not have full-time, first-time degree-seeking undergraduate students in the applicable cohort year or the financial aid year.
		National Center for Education Statistics
		College Navigator
		Generated at:9/4/2015 11:33:27 AM from URL:http://nces.ed.gov/collegenavigator/default.aspx?s=all&p=11.0401&l=94&xp=1
		Name	Address	Website	Type	Awards offered	Campus setting	Campus housing	Student population	Undergraduate students	Graduation Rate	Transfer-Out Rate	Cohort Year *	Net Price **	Largest Program	IPEDS ID	OPE ID
Information Science/Studies	Advanced	Ball State University	2000 University Ave, Muncie, Indiana 47306	www.bsu.edu	4-year, Public	Less than one year certificate;Associate's degree;Bachelor's degree;Postbaccalaureate certificate;Master's degree;Post-master's certificate;Doctor's degree - research/scholarship;Doctor's degree - professional practice;Doctor's degree - other	City: Small	Yes	20655	16415	59%	NA	Fall 2008	$12,804	-	150136	00178600
Information Science/Studies	Advanced	Barry University	11300 NE 2nd Ave, Miami, Florida 33161-6695	www.barry.edu	4-year, Private not-for-profit	Bachelor's degree;Postbaccalaureate certificate;Master's degree;Post-master's certificate;Doctor's degree - research/scholarship;Doctor's degree - professional practice;Doctor's degree - other	Suburb: Large	Yes	8518	3996	36%	47%	Fall 2008	$24,610	-	132471	00146600
Information Science/Studies	Advanced	Baylor University	500 Speight Ave., Waco, Texas 76798	www.baylor.edu	4-year, Private not-for-profit	Bachelor's degree;Master's degree;Post-master's certificate;Doctor's degree - research/scholarship;Doctor's degree - professional practice	City: Midsize	Yes	16263	13859	72%	NA	Fall 2008	$34,900	-	223232	00354500
Information Science/Studies	Advanced	Bentley University	175 Forest St, Waltham, Massachusetts 02452-4705	www.bentley.edu	4-year, Private not-for-profit	Less than one year certificate;Associate's degree;Bachelor's degree;Postbaccalaureate certificate;Master's degree;Post-master's certificate;Doctor's degree - research/scholarship	City: Small	Yes	5565	4264	88%	7%	Fall 2008	$31,653	-	164739	00212400
Information Science/Studies	Advanced	Boston University	One Silber Way, Boston, Massachusetts 02215	www.bu.edu	4-year, Private not-for-profit	Bachelor's degree;Postbaccalaureate certificate;Master's degree;Post-master's certificate;Doctor's degree - research/scholarship;Doctor's degree - professional practice	City: Large	Yes	32112	18017	85%	NA	Fall 2008	$32,539	-	164988	00213000
Information Science/Studies	Advanced	Bowie State University	14000 Jericho Park Rd, Bowie, Maryland 20715-9465	www.bowiestate.edu	4-year, Public	Bachelor's degree;Postbaccalaureate certificate;Master's degree;Post-master's certificate;Doctor's degree - research/scholarship	Suburb: Large	Yes	5695	4456	33%	27%	Fall 2008	$11,663	-	162007	00206200
Information Science/Studies	Advanced	Bradley University	1501 W Bradley Ave, Peoria, Illinois 61625-0001	www.bradley.edu	4-year, Private not-for-profit	Bachelor's degree;Postbaccalaureate certificate;Master's degree;Post-master's certificate;Doctor's degree - professional practice	City: Midsize	Yes	5300	4588	74%	NA	Fall 2008	$27,451	-	143358	00164100
Information Science/Studies	Advanced	Capitol Technology University	11301 Springfield Rd, Laurel, Maryland 20708	www.capitol-college.edu	4-year, Private not-for-profit	Less than one year certificate;Associate's degree;Bachelor's degree;Postbaccalaureate certificate;Master's degree;Doctor's degree - research/scholarship	Suburb: Large	Yes	793	417	41%	NA	Fall 2008	$20,045	-	162061	00143600
Information Science/Studies	Advanced	Carnegie Mellon University	5000 Forbes Avenue, Pittsburgh, Pennsylvania 15213-3890	www.cmu.edu/	4-year, Private not-for-profit	Bachelor's degree;Postbaccalaureate certificate;Master's degree;Post-master's certificate;Doctor's degree - research/scholarship	City: Large	Yes	12587	5888	88%	NA	Fall 2008	$33,670	-	211440	00324200
Information Science/Studies	Advanced	Central Connecticut State University	1615 Stanley St, New Britain, Connecticut 06050	www.ccsu.edu	4-year, Public	Less than one year certificate;Bachelor's degree;Postbaccalaureate certificate;Master's degree;Post-master's certificate;Doctor's degree - research/scholarship	Suburb: Large	Yes	12037	9871	52%	NA	Fall 2008	$14,734	-	128771	00137800
Information Science/Studies	Advanced	Claremont Graduate University	150 E Tenth St, Claremont, California 91711-6160	www.cgu.edu	4-year, Private not-for-profit	Postbaccalaureate certificate;Master's degree;Doctor's degree - research/scholarship	Suburb: Large	Yes	2160		NA	NA	Fall 2008	NA	-	112251	00116900
Information Science/Studies	Advanced	Colorado State University-Fort Collins	102 Administration Building, Fort Collins, Colorado 80523-0100	www.colostate.edu	4-year, Public	Bachelor's degree;Postbaccalaureate certificate;Master's degree;Doctor's degree - research/scholarship;Doctor's degree - professional practice	City: Midsize	Yes	31354	23598	65%	10%	Fall 2008	$14,511	-	126818	00135000
Information Science/Studies	Advanced	CUNY Bernard M Baruch College	One Bernard Baruch Way (55 Lexington Ave at 24th St), New York, New York 10010	www.baruch.cuny.edu	4-year, Public	Bachelor's degree;Postbaccalaureate certificate;Master's degree;Post-master's certificate	City: Large	Yes	18090	14857	66%	18%	Fall 2008	$8,151	-	190512	00727300
Information Science/Studies	Advanced	CUNY Brooklyn College	2900 Bedford Ave, Brooklyn, New York 11210	www.brooklyn.cuny.edu	4-year, Public	Less than one year certificate;One but less than two years certificate;Bachelor's degree;Postbaccalaureate certificate;Master's degree;Post-master's certificate	City: Large	Yes	17390	14115	50%	26%	Fall 2008	$7,220	-	190549	00268700
Information Science/Studies	Advanced	CUNY City College	160 Convent Ave, New York, New York 10031	www.ccny.cuny.edu	4-year, Public	Bachelor's degree;Postbaccalaureate certificate;Master's degree;Post-master's certificate;Doctor's degree - research/scholarship	City: Large	Yes	15579	12893	44%	32%	Fall 2008	$7,125	-	190567	00268800
Information Science/Studies	Advanced	Dakota State University	820 N Washington Ave, Madison, South Dakota 57042-1799	www.dsu.edu	4-year, Public	Less than one year certificate;One but less than two years certificate;Associate's degree;Bachelor's degree;Postbaccalaureate certificate;Master's degree;Doctor's degree - research/scholarship	Town: Distant	Yes	3047	2736	41%	38%	Fall 2008	$14,166	-	219082	00346300
Information Science/Studies	Advanced	DePaul University	1 E Jackson Blvd, Chicago, Illinois 60604	www.depaul.edu	4-year, Private not-for-profit	Less than one year certificate;One but less than two years certificate;Bachelor's degree;Master's degree;Post-master's certificate;Doctor's degree - research/scholarship;Doctor's degree - professional practice	City: Large	Yes	23799	16153	71%	NA	Fall 2008	$29,756	-	144740	00167100
Information Science/Studies	Advanced	DeSales University	2755 Station Avenue, Center Valley, Pennsylvania 18034-9568	www.desales.edu	4-year, Private not-for-profit	Less than one year certificate;One but less than two years certificate;Bachelor's degree;Postbaccalaureate certificate;Master's degree;Post-master's certificate;Doctor's degree - professional practice	Rural: Fringe	Yes	3190	2383	71%	NA	Fall 2008	$28,660	-	210739	00398600
Information Science/Studies	Advanced	Dominican University	7900 W Division Street, River Forest, Illinois 60305	www.dom.edu/	4-year, Private not-for-profit	One but less than two years certificate;Bachelor's degree;Postbaccalaureate certificate;Master's degree;Post-master's certificate;Doctor's degree - research/scholarship	Suburb: Large	Yes	3498	2180	63%	32%	Fall 2008	$16,505	-	148496	00175000
Information Science/Studies	Advanced	Drexel University	3141 Chestnut St, Philadelphia, Pennsylvania 19104	www.drexel.edu	4-year, Private not-for-profit	Less than one year certificate;One but less than two years certificate;Associate's degree;Bachelor's degree;Postbaccalaureate certificate;Master's degree;Post-master's certificate;Doctor's degree - research/scholarship;Doctor's degree - professional practice;Doctor's degree - other	City: Large	Yes	26359	16896	67%	24%	Fall 2008	$37,244	-	212054	00325600
Information Science/Studies	Advanced	Eastern Michigan University	202 Welch Hall, Ypsilanti, Michigan 48197	www.emich.edu	4-year, Public	Bachelor's degree;Postbaccalaureate certificate;Master's degree;Post-master's certificate;Doctor's degree - research/scholarship	Suburb: Large	Yes	22401	18340	37%	NA	Fall 2008	$13,040	-	169798	00225900
Information Science/Studies	Advanced	Elizabethtown College School of Continuing and Professional Studies	One Alpha Drive, Elizabethtown, Pennsylvania 17022	www.etowndegrees.com/	4-year, Private not-for-profit	Associate's degree;Bachelor's degree;Postbaccalaureate certificate;Master's degree	Suburb: Large	No	422	346	NA	NA	Fall 2008	NA	-	480134	00326200
Information Science/Studies	Advanced	Fairleigh Dickinson University-Metropolitan Campus	1000 River Rd, Teaneck, New Jersey 07666	www.fdu.edu	4-year, Private not-for-profit	Less than one year certificate;Associate's degree;Bachelor's degree;Postbaccalaureate certificate;Master's degree;Post-master's certificate;Doctor's degree - research/scholarship;Doctor's degree - professional practice	Suburb: Large	Yes	8777	6051	48%	NA	Fall 2008	$17,540	-	184603	00260700
Information Science/Studies	Advanced	Florida Institute of Technology	150 West University Boulevard, Melbourne, Florida 32901-6975	www.fit.edu	4-year, Private not-for-profit	Bachelor's degree;Master's degree;Post-master's certificate;Doctor's degree - research/scholarship;Doctor's degree - professional practice	City: Small	Yes	6393	3636	55%	34%	Fall 2008	$30,477	-	133881	00146900
Information Science/Studies	Advanced	Fordham University	441 E Fordham Rd, Bronx, New York 10458	www.fordham.edu	4-year, Private not-for-profit	Bachelor's degree;Postbaccalaureate certificate;Master's degree;Post-master's certificate;Doctor's degree - research/scholarship;Doctor's degree - professional practice	City: Large	Yes	15231	8633	80%	NA	Fall 2008	$35,605	-	191241	00272200
Information Science/Studies	Advanced	George Mason University	4400 University Dr, Fairfax, Virginia 22030-4444	www.gmu.edu	4-year, Public	Bachelor's degree;Postbaccalaureate certificate;Master's degree;Post-master's certificate;Doctor's degree - research/scholarship;Doctor's degree - professional practice	Suburb: Large	Yes	33729	22349	67%	20%	Fall 2008	$17,347	-	232186	00374900
Information Science/Studies	Advanced	George Washington University	2121 I Street, NW, Washington, District of Columbia 20052	www.gwu.edu	4-year, Private not-for-profit	One but less than two years certificate;Associate's degree;Bachelor's degree;Postbaccalaureate certificate;Master's degree;Post-master's certificate;Doctor's degree - research/scholarship;Doctor's degree - professional practice	City: Large	Yes	25613	10740	79%	NA	Fall 2008	$32,826	-	131469	00144400
Information Science/Studies	Advanced	Georgia Institute of Technology-Main Campus	225 North Ave, Atlanta, Georgia 30332-0530	www.gatech.edu	4-year, Public	Bachelor's degree;Master's degree;Doctor's degree - research/scholarship	City: Large	Yes	23109	14682	82%	6%	Fall 2008	$12,187	-	139755	00156900
Information Science/Studies	Advanced	Golden Gate University-San Francisco	536 Mission Street, San Francisco, California 94105-2968	www.ggu.edu	4-year, Private not-for-profit	Less than one year certificate;Bachelor's degree;Postbaccalaureate certificate;Master's degree;Post-master's certificate;Doctor's degree - research/scholarship;Doctor's degree - professional practice	City: Large	No	2909	489	NA	NA	Fall 2008	NA	-	115083	00120500
Information Science/Studies	Advanced	Grand Valley State University	1 Campus Dr, Allendale, Michigan 49401-9403	www.gvsu.edu	4-year, Public	Bachelor's degree;Postbaccalaureate certificate;Master's degree;Post-master's certificate;Doctor's degree - professional practice	Suburb: Large	Yes	25094	21636	65%	13%	Fall 2008	$16,370	-	170082	00226800
Information Science/Studies	Advanced	Hawaii Pacific University	1164 Bishop Street, Suite 800, Honolulu, Hawaii 96813	www.hpu.edu	4-year, Private not-for-profit	Less than one year certificate;Associate's degree;Bachelor's degree;Postbaccalaureate certificate;Master's degree;Post-master's certificate	City: Large	Yes	5827	4835	42%	NA	Fall 2008	$21,275	-	141644	00727900
Information Science/Studies	Advanced	Hood College	401 Rosemont Ave, Frederick, Maryland 21701	www.hood.edu	4-year, Private not-for-profit	Less than one year certificate;Bachelor's degree;Postbaccalaureate certificate;Master's degree	City: Small	Yes	2365	1359	71%	21%	Fall 2008	$23,850	-	162760	00207600
Information Science/Studies	Advanced	Howard University	2400 Sixth St NW, Washington, District of Columbia 20059-0001	www.howard.edu	4-year, Private not-for-profit	Two but less than 4 years certificate;Bachelor's degree;Postbaccalaureate certificate;Master's degree;Post-master's certificate;Doctor's degree - research/scholarship;Doctor's degree - professional practice	City: Large	Yes	10265	7013	60%	NA	Fall 2008	$22,337	-	131520	00144800
Information Science/Studies	Advanced	Johns Hopkins University	3400 N Charles St, Mason Hall, Baltimore, Maryland 21218-2688	www.jhu.edu	4-year, Private not-for-profit	Two but less than 4 years certificate;Bachelor's degree;Postbaccalaureate certificate;Master's degree;Post-master's certificate;Doctor's degree - research/scholarship;Doctor's degree - professional practice	City: Large	Yes	21372	6357	93%	2%	Fall 2008	$25,207	-	162928	00207700
Information Science/Studies	Advanced	Kennesaw State University	1000 Chastain Rd, Kennesaw, Georgia 30144-5591	www.kennesaw.edu	4-year, Public	Less than one year certificate;One but less than two years certificate;Bachelor's degree;Postbaccalaureate certificate;Master's degree;Post-master's certificate;Doctor's degree - research/scholarship	Suburb: Large	Yes	25714	23592	43%	21%	Fall 2008	$16,232	-	140164	00157700
Information Science/Studies	Advanced	Kent State University at Kent	Executive Office, 2nd Floor Library, Kent, Ohio 44242-0001	www.kent.edu	4-year, Public	Less than one year certificate;One but less than two years certificate;Bachelor's degree;Postbaccalaureate certificate;Master's degree;Post-master's certificate;Doctor's degree - research/scholarship;Doctor's degree - professional practice	Suburb: Large	Yes	29477	23328	55%	25%	Fall 2008	$18,106	-	203517	00305100
Information Science/Studies	Advanced	Lawrence Technological University	21000 West Ten Mile Road, Southfield, Michigan 48075-1058	www.ltu.edu	4-year, Private not-for-profit	One but less than two years certificate;Associate's degree;Bachelor's degree;Postbaccalaureate certificate;Master's degree;Doctor's degree - research/scholarship	City: Small	Yes	4015	2798	44%	NA	Fall 2008	$25,824	-	170675	00227900
Information Science/Studies	Advanced	Lehigh University	27 Memorial Drive West, Bethlehem, Pennsylvania 18015	www.lehigh.edu	4-year, Private not-for-profit	Bachelor's degree;Master's degree;Post-master's certificate;Doctor's degree - research/scholarship	City: Small	Yes	7119	5062	87%	NA	Fall 2008	$27,848	-	213543	00328900
Information Science/Studies	Advanced	LIU Post	720 Northern Blvd, Brookville, New York 11548-1327	liu.edu/CWPost	4-year, Private not-for-profit	One but less than two years certificate;Associate's degree;Bachelor's degree;Postbaccalaureate certificate;Master's degree;Post-master's certificate;Doctor's degree - research/scholarship	Suburb: Large	Yes	9486	7117	41%	46%	Fall 2008	$29,039	-	192448	00275100
Information Science/Studies	Advanced	Louisiana State University and Agricultural & Mechanical College	156 Thomas Boyd Hall, Baton Rouge, Louisiana 70803-2750	www.lsu.edu	4-year, Public	Bachelor's degree;Postbaccalaureate certificate;Master's degree;Post-master's certificate;Doctor's degree - research/scholarship;Doctor's degree - professional practice	Rural: Fringe	Yes	31044	25572	67%	NA	Fall 2008	$13,409	-	159391	00201000
Information Science/Studies	Advanced	Louisiana State University-Shreveport	One University Place, Shreveport, Louisiana 71115-2399	www.lsus.edu/	4-year, Public	Bachelor's degree;Postbaccalaureate certificate;Master's degree;Post-master's certificate	City: Midsize	No	4186	3202	31%	NA	Fall 2008	$7,433	-	159416	00201300
Information Science/Studies	Advanced	Marshall University	1 John Marshall Dr, Huntington, West Virginia 25755	www.marshall.edu/	4-year, Public	Less than one year certificate;Associate's degree;Bachelor's degree;Postbaccalaureate certificate;Master's degree;Post-master's certificate;Doctor's degree - research/scholarship;Doctor's degree - professional practice	City: Small	Yes	13381	9536	44%	33%	Fall 2008	$8,738	-	237525	00381500
Information Science/Studies	Advanced	Missouri University of Science and Technology	1870 Miner Circle, Rolla, Missouri 65409	www.mst.edu/	4-year, Public	One but less than two years certificate;Bachelor's degree;Postbaccalaureate certificate;Master's degree;Doctor's degree - research/scholarship	Town: Remote	Yes	8640	6520	63%	NA	Fall 2008	$14,377	-	178411	00251700
Information Science/Studies	Advanced	Murray State University	218 Wells Hall, Murray, Kentucky 42071-3318	www.murraystate.edu	4-year, Public	Less than one year certificate;Associate's degree;Bachelor's degree;Postbaccalaureate certificate;Master's degree;Post-master's certificate;Doctor's degree - research/scholarship;Doctor's degree - professional practice	Town: Remote	Yes	11207	9444	52%	NA	Fall 2008	$9,970	-	157401	00197700
Information Science/Studies	Advanced	New Jersey Institute of Technology	University Heights, Newark, New Jersey 07102	www.njit.edu/	4-year, Public	Bachelor's degree;Postbaccalaureate certificate;Master's degree;Doctor's degree - research/scholarship	City: Large	Yes	10646	7550	59%	NA	Fall 2008	$14,875	-	185828	00262100
Information Science/Studies	Advanced	New Mexico Highlands University	University Ave, Las Vegas, New Mexico 87701	www.nmhu.edu	4-year, Public	Associate's degree;Bachelor's degree;Postbaccalaureate certificate;Master's degree	Town: Remote	Yes	3546	2275	17%	46%	Fall 2008	$10,241	-	187897	00265300
Information Science/Studies	Advanced	New York University	70 Washington Sq South, New York, New York 10012-1091	www.nyu.edu	4-year, Private not-for-profit	Less than one year certificate;One but less than two years certificate;Associate's degree;Bachelor's degree;Postbaccalaureate certificate;Master's degree;Post-master's certificate;Doctor's degree - research/scholarship;Doctor's degree - professional practice;Doctor's degree - other	City: Large	Yes	49274	24985	83%	NA	Fall 2008	$35,543	-	193900	00278500
Information Science/Studies	Advanced	North Carolina Central University	1801 Fayetteville Street, Durham, North Carolina 27707	www.nccu.edu	4-year, Public	Bachelor's degree;Postbaccalaureate certificate;Master's degree;Doctor's degree - research/scholarship;Doctor's degree - professional practice	City: Midsize	Yes	7687	5917	47%	19%	Fall 2008	$9,701	-	199157	00295000
Information Science/Studies	Advanced	Northeastern University	360 Huntington Ave, Boston, Massachusetts 02115-5005	www.northeastern.edu	4-year, Private not-for-profit	Bachelor's degree;Master's degree;Post-master's certificate;Doctor's degree - research/scholarship;Doctor's degree - professional practice;Doctor's degree - other	City: Large	Yes	19798	13510	82%	NA	Fall 2008	$30,546	-	167358	00219900
Information Science/Studies	Advanced	Northeastern University Global Network	360 Huntington Ave, Boston, Massachusetts 02115	www.northeastern.edu/globalnetwork	4-year, Private not-for-profit	Associate's degree;Bachelor's degree;Master's degree;Post-master's certificate;Doctor's degree - professional practice;Doctor's degree - other	City: Large	No	10102	3689	NA	NA	Fall 2008	NA	-	482705	00219900
Information Science/Studies	Advanced	Northwestern University	633 Clark St, Evanston, Illinois 60208	www.northwestern.edu	4-year, Private not-for-profit	One but less than two years certificate;Bachelor's degree;Postbaccalaureate certificate;Master's degree;Post-master's certificate;Doctor's degree - research/scholarship;Doctor's degree - professional practice	City: Small	Yes	21554	9048	93%	NA	Fall 2008	$28,667	-	147767	00173900
Information Science/Studies	Advanced	Norwich University	158 Harmon Drive, Northfield, Vermont 05663-1035	www.norwich.edu	4-year, Private not-for-profit	Bachelor's degree;Master's degree	Town: Distant	Yes	3672	2648	58%	NA	Fall 2008	$27,429	-	230995	00369200
Information Science/Studies	Advanced	Notre Dame of Maryland University	4701 N Charles St, Baltimore, Maryland 21210-2476	www.ndm.edu	4-year, Private not-for-profit	Two but less than 4 years certificate;Bachelor's degree;Postbaccalaureate certificate;Master's degree;Post-master's certificate;Doctor's degree - research/scholarship;Doctor's degree - professional practice	City: Large	Yes	2764	1169	58%	NA	Fall 2008	$18,370	-	163578	00206500
Information Science/Studies	Advanced	Nova Southeastern University	3301 College Ave, Fort Lauderdale, Florida 33314-7796	www.nova.edu	4-year, Private not-for-profit	Less than one year certificate;One but less than two years certificate;Associate's degree;Bachelor's degree;Postbaccalaureate certificate;Master's degree;Post-master's certificate;Doctor's degree - research/scholarship;Doctor's degree - professional practice	Suburb: Large	Yes	24148	4699	46%	43%	Fall 2008	$24,833	-	136215	00150900
Information Science/Studies	Advanced	Pace University-New York	1 Pace Plaza, New York, New York 10038-1598	www.pace.edu	4-year, Private not-for-profit	Less than one year certificate;Associate's degree;Bachelor's degree;Postbaccalaureate certificate;Master's degree;Post-master's certificate;Doctor's degree - research/scholarship;Doctor's degree - professional practice	City: Large	Yes	12857	8694	55%	NA	Fall 2008	$29,641	-	194310	00279100
Information Science/Studies	Advanced	Pennsylvania State University-Main Campus	201 Old Main, University Park, Pennsylvania 16802	www.psu.edu/	4-year, Public	Less than one year certificate;One but less than two years certificate;Associate's degree;Bachelor's degree;Postbaccalaureate certificate;Master's degree;Doctor's degree - research/scholarship;Doctor's degree - professional practice	City: Small	Yes	47040	40541	86%	NA	Fall 2008	$24,220	-	214777	00332900
Information Science/Studies	Advanced	Pennsylvania State University-World Campus	128 Outreach Building, University Park, Pennsylvania 16802	www.worldcampus.psu.edu/	4-year, Public	Less than one year certificate;Associate's degree;Bachelor's degree;Postbaccalaureate certificate;Master's degree;Doctor's degree - professional practice	Rural: Fringe	No	10805	6245	25%	NA	Fall 2008	$22,017	-	479956	00332900
Information Science/Studies	Advanced	Prairie View A & M University	FM 1098 Road & University Drive, Prairie View, Texas 77446	www.pvamu.edu	4-year, Public	Bachelor's degree;Master's degree;Doctor's degree - research/scholarship	Town: Distant	Yes	8429	6905	38%	36%	Fall 2008	$8,628	-	227526	00363000
Information Science/Studies	Advanced	Rensselaer Hartford Graduate Center Inc	275 Windsor St, Hartford, Connecticut 06120	ewp.rpi.edu/index.html	4-year, Private not-for-profit	Postbaccalaureate certificate;Master's degree	City: Midsize	No	191		NA	NA	Fall 2008	NA	-	129428	00280301
Information Science/Studies	Advanced	Robert Morris University	6001 University Boulevard, Moon Township, Pennsylvania 15108-1189	www.rmu.edu	4-year, Private not-for-profit	Less than one year certificate;One but less than two years certificate;Bachelor's degree;Postbaccalaureate certificate;Master's degree;Doctor's degree - research/scholarship;Doctor's degree - professional practice	Suburb: Large	Yes	5555	4574	62%	26%	Fall 2008	$23,906	-	215655	00335900
Information Science/Studies	Advanced	Rochester Institute of Technology	1 Lomb Memorial Dr, Rochester, New York 14623-5603	www.rit.edu/	4-year, Private not-for-profit	Less than one year certificate;One but less than two years certificate;Associate's degree;Bachelor's degree;Postbaccalaureate certificate;Master's degree;Doctor's degree - research/scholarship	Suburb: Large	Yes	16310	13460	63%	NA	Fall 2008	$27,923	-	195003	00280600
Information Science/Studies	Advanced	Roosevelt University	430 S Michigan Ave, Chicago, Illinois 60605-1394	www.roosevelt.edu	4-year, Private not-for-profit	Less than one year certificate;Bachelor's degree;Postbaccalaureate certificate;Master's degree;Doctor's degree - research/scholarship;Doctor's degree - professional practice	City: Large	Yes	6069	3793	30%	NA	Fall 2008	$26,202	-	148487	00174900
Information Science/Studies	Advanced	Rutgers University-New Brunswick	83 Somerset St, New Brunswick, New Jersey 08901-1281	www.rutgers.edu/	4-year, Public	One but less than two years certificate;Associate's degree;Bachelor's degree;Postbaccalaureate certificate;Master's degree;Post-master's certificate;Doctor's degree - research/scholarship;Doctor's degree - professional practice	City: Small	Yes	48378	34544	81%	11%	Fall 2008	$15,917	-	186380	00262900
Information Science/Studies	Advanced	Shenandoah University	1460 University Dr, Winchester, Virginia 22601-5195	www.su.edu	4-year, Private not-for-profit	Less than one year certificate;One but less than two years certificate;Bachelor's degree;Postbaccalaureate certificate;Master's degree;Post-master's certificate;Doctor's degree - research/scholarship;Doctor's degree - professional practice	City: Small	Yes	3693	1892	55%	NA	Fall 2008	$28,306	-	233541	00373700
Information Science/Studies	Advanced	Simmons College	300 The Fenway, Boston, Massachusetts 02115-5898	www.simmons.edu	4-year, Private not-for-profit	Bachelor's degree;Postbaccalaureate certificate;Master's degree;Post-master's certificate;Doctor's degree - research/scholarship;Doctor's degree - professional practice	City: Large	Yes	4802	1622	67%	14%	Fall 2008	$28,840	-	167783	00220800
Information Science/Studies	Advanced	South University-Austin	7700 W Palmer Ln Bldg A Ste A100, Austin, Texas 78729	www.southuniversity.edu	4-year, Private for-profit	Associate's degree;Bachelor's degree;Master's degree	Rural: Fringe	No	249	218	NA	NA	Fall 2008	$27,001	-	480073	01303915
Information Science/Studies	Advanced	South University–Savannah Online	709 Mall Blvd, Savannah, Georgia 31406	online.southuniversity.edu/	4-year, Private for-profit	Associate's degree;Bachelor's degree;Master's degree;Post-master's certificate;Doctor's degree - professional practice	City: Midsize	No	11522	8833	2%	NA	Fall 2008	$21,347	-	475121	01303900
Information Science/Studies	Advanced	South University-West Palm Beach	9801 Belvedere Road, Royal Palm Beach, Florida 33411	www.southuniversity.edu	4-year, Private for-profit	Associate's degree;Bachelor's degree;Master's degree;Doctor's degree - professional practice	Suburb: Large	No	1081	942	7%	NA	Fall 2008	$22,405	-	133465	01303904
Information Science/Studies	Advanced	Stevenson University	1525 Greenspring Valley Rd, Stevenson, Maryland 21153-0641	www.stevenson.edu	4-year, Private not-for-profit	Bachelor's degree;Master's degree	Rural: Fringe	Yes	4322	3808	63%	NA	Fall 2008	$26,289	-	164173	00210700
Information Science/Studies	Advanced	Stony Brook University	310 Administration Building, Stony Brook, New York 11794	www.stonybrook.edu	4-year, Public	Bachelor's degree;Postbaccalaureate certificate;Master's degree;Post-master's certificate;Doctor's degree - research/scholarship;Doctor's degree - professional practice	Suburb: Large	Yes	24607	16480	69%	21%	Fall 2008	$13,352	-	196097	00283800
Information Science/Studies	Advanced	Stratford University	3201 Jermantown Road, Suite 500, Fairfax, Virginia 22030	www.stratford.edu	4-year, Private for-profit	One but less than two years certificate;Associate's degree;Bachelor's degree;Master's degree	Suburb: Large	No	2971	2336	44%	NA	Fall 2008	$23,728	-	438498	02541200
Information Science/Studies	Advanced	Strayer University-Alabama	3570 Grandview Pkwy Ste 200, Birmingham, Alabama 35243	www.strayer.edu/alabama/birmingham	4-year, Private for-profit	Less than one year certificate;One but less than two years certificate;Associate's degree;Bachelor's degree;Postbaccalaureate certificate;Master's degree	City: Midsize	No	833	422	0%	NA	Fall 2008	$31,954	-	450377	00145953
Information Science/Studies	Advanced	Strayer University-Arkansas	10825 Financial Centre Pkwy Ste 400, Little Rock, Arkansas 72211	www.strayer.edu/arkansas/little-rock	4-year, Private for-profit	Less than one year certificate;One but less than two years certificate;Associate's degree;Bachelor's degree;Postbaccalaureate certificate;Master's degree	City: Midsize	No	259	152	NA	NA	Fall 2008	NA	-	458885	00145984
Information Science/Studies	Advanced	Strayer University-Delaware	240 Continental Dr Ste 108, Newark, Delaware 19713	www.strayer.edu/delaware/christiana	4-year, Private for-profit	Less than one year certificate;One but less than two years certificate;Associate's degree;Bachelor's degree;Postbaccalaureate certificate;Master's degree	Suburb: Large	No	335	237	50%	NA	Fall 2008	NA	-	450298	00145948
Information Science/Studies	Advanced	Strayer University-District of Columbia	1133 15th St NW, Washington, District of Columbia 20005	www.strayer.edu/district-columbia/washington	4-year, Private for-profit	Less than one year certificate;One but less than two years certificate;Associate's degree;Bachelor's degree;Postbaccalaureate certificate;Master's degree	City: Large	No	1192	783	26%	NA	Fall 2008	$30,553	-	131803	00145900
Information Science/Studies	Advanced	Strayer University-Florida	4902 Eisenhower Blvd Ste 100, Tampa, Florida 33634	www.strayer.edu/florida/tampa-westshore	4-year, Private for-profit	Less than one year certificate;One but less than two years certificate;Associate's degree;Bachelor's degree;Postbaccalaureate certificate;Master's degree	Suburb: Large	No	2769	1927	44%	NA	Fall 2008	$28,671	-	449038	00145942
Information Science/Studies	Advanced	Strayer University-Georgia	3355 Northeast Expwy, Ste 100, Atlanta, Georgia 30341	www.strayer.edu/georgia/chamblee	4-year, Private for-profit	Less than one year certificate;One but less than two years certificate;Associate's degree;Bachelor's degree;Postbaccalaureate certificate;Master's degree	Suburb: Large	No	5296	3627	19%	NA	Fall 2008	$29,674	-	458919	00145939
Information Science/Studies	Advanced	Strayer University-Global Region	1133 15th St NW, Washington, District of Columbia 20005	www.strayer.edu	4-year, Private for-profit	Less than one year certificate;One but less than two years certificate;Associate's degree;Bachelor's degree;Postbaccalaureate certificate;Master's degree	City: Large	No	4500	2766	13%	NA	Fall 2008	$28,535	-	459994	00145900
Information Science/Studies	Advanced	Strayer University-Louisiana	111 Veterans Memorial Blvd, Ste 420, Metairie, Louisiana 70005	www.strayer.edu/louisiana/metairie	4-year, Private for-profit	Less than one year certificate;One but less than two years certificate;Associate's degree;Bachelor's degree;Postbaccalaureate certificate;Master's degree	City: Midsize	No	155	114	NA	NA	Fall 2008	$27,360	-	458937	00145988
Information Science/Studies	Advanced	Strayer University-Maryland	4710 Auth Pl 1st Fl, Suitland, Maryland 20746	www.strayer.edu/maryland/prince-georges	4-year, Private for-profit	Less than one year certificate;One but less than two years certificate;Associate's degree;Bachelor's degree;Postbaccalaureate certificate;Master's degree	Suburb: Large	No	2873	1966	22%	NA	Fall 2008	$28,771	-	430184	00145911
Information Science/Studies	Advanced	Strayer University-Mississippi	460 Briarwood Dr, Jackson, Mississippi 39206	www.strayer.edu/mississippi/jackson	4-year, Private for-profit	Less than one year certificate;One but less than two years certificate;Associate's degree;Bachelor's degree;Postbaccalaureate certificate;Master's degree	City: Midsize	No	276	159	NA	NA	Fall 2008	NA	-	458955	00145991
Information Science/Studies	Advanced	Strayer University-New Jersey	2201 Rte 38 Ste 100, Cherry Hill, New Jersey 08002	www.strayer.edu/new-jersey/cherry-hill	4-year, Private for-profit	Less than one year certificate;One but less than two years certificate;Associate's degree;Bachelor's degree;Postbaccalaureate certificate;Master's degree	Suburb: Large	No	858	648	9%	NA	Fall 2008	$26,419	-	453215	00145961
Information Science/Studies	Advanced	Strayer University-North Carolina	4 Copley Pkwy, Morrisville, North Carolina 27560	www.strayer.edu/north-carolina/rtp	4-year, Private for-profit	Less than one year certificate;One but less than two years certificate;Associate's degree;Bachelor's degree;Postbaccalaureate certificate;Master's degree	Suburb: Large	No	4092	2500	13%	NA	Fall 2008	$30,447	-	453163	00145929
Information Science/Studies	Advanced	Strayer University-Pennsylvania	3600 Horizon Blvd Ste 100, Trevose, Pennsylvania 19053	www.strayer.edu/pennsylvania/lower-bucks-county	4-year, Private for-profit	Less than one year certificate;One but less than two years certificate;Associate's degree;Bachelor's degree;Postbaccalaureate certificate;Master's degree	Suburb: Large	No	2103	1538	7%	NA	Fall 2008	$23,720	-	443784	00145935
Information Science/Studies	Advanced	Strayer University-South Carolina	555 N Pleasantburg Dr Ste 300, Greenville, South Carolina 29607	www.strayer.edu/south-carolina/greenville	4-year, Private for-profit	Less than one year certificate;One but less than two years certificate;Associate's degree;Bachelor's degree;Postbaccalaureate certificate;Master's degree	City: Small	No	1991	1206	20%	NA	Fall 2008	$29,193	-	458964	00145937
Information Science/Studies	Advanced	Strayer University-Tennessee	2620 Thousand Oaks Blvd Ste 1100, Memphis, Tennessee 38118	www.strayer.edu/tennessee/thousand-oaks	4-year, Private for-profit	Less than one year certificate;One but less than two years certificate;Associate's degree;Bachelor's degree;Postbaccalaureate certificate;Master's degree	City: Large	No	1960	1275	38%	NA	Fall 2008	$29,291	-	443766	00145932
Information Science/Studies	Advanced	Strayer University-Texas	8501 N. Mopac Expressway, Austin, Texas 78759	www.strayer.edu/texas/north-austin	4-year, Private for-profit	Less than one year certificate;One but less than two years certificate;Associate's degree;Bachelor's degree;Postbaccalaureate certificate;Master's degree	City: Large	No	1626	1220	NA	NA	Fall 2008	$29,376	-	458973	00145987
Information Science/Studies	Advanced	Strayer University-Virginia	2121 15th Street N, Arlington, Virginia 22207	www.strayer.edu/virginia/arlington	4-year, Private for-profit	Less than one year certificate;One but less than two years certificate;Associate's degree;Bachelor's degree;Postbaccalaureate certificate;Master's degree	City: Midsize	No	6850	4504	19%	NA	Fall 2008	$29,174	-	233684	00145901
Information Science/Studies	Advanced	Strayer University-West Virginia	100 Corporate Center Dr, Scott Depot, West Virginia 25560	www.strayer.edu/west-virginia/teays-valley	4-year, Private for-profit	Less than one year certificate;One but less than two years certificate;Associate's degree;Bachelor's degree;Postbaccalaureate certificate;Master's degree	Suburb: Midsize	No	191	156	NA	NA	Fall 2008	NA	-	456621	00145974
Information Science/Studies	Advanced	SUNY at Albany	1400 Washington Avenue, Albany, New York 12222	www.albany.edu	4-year, Public	Bachelor's degree;Postbaccalaureate certificate;Master's degree;Post-master's certificate;Doctor's degree - research/scholarship	City: Small	Yes	17273	12929	66%	17%	Fall 2008	$14,415	-	196060	00283500
Information Science/Studies	Advanced	SUNY Institute of Technology at Utica-Rome	100 Seymour Rd, Utica, New York 13502	www.sunyit.edu	4-year, Public	Bachelor's degree;Postbaccalaureate certificate;Master's degree;Post-master's certificate	Suburb: Midsize	Yes	2740	2037	43%	31%	Fall 2008	$15,174	-	196112	01167800
Information Science/Studies	Advanced	Syracuse University	900 South Crouse Ave., Syracuse, New York 13244	syr.edu/	4-year, Private not-for-profit	Less than one year certificate;Associate's degree;Bachelor's degree;Postbaccalaureate certificate;Master's degree;Post-master's certificate;Doctor's degree - research/scholarship;Doctor's degree - professional practice	City: Midsize	Yes	21492	15224	80%	NA	Fall 2008	$29,621	-	196413	00288200
Information Science/Studies	Advanced	Tarleton State University	1333 W. Washington, Stephenville, Texas 76401-0000	www.tarleton.edu	4-year, Public	Associate's degree;Bachelor's degree;Master's degree;Doctor's degree - research/scholarship	Town: Remote	Yes	11681	10217	45%	35%	Fall 2008	$11,926	-	228529	00363100
Information Science/Studies	Advanced	Texas A & M International University	5201 University Blvd, Laredo, Texas 78041-1900	tamiu.edu	4-year, Public	Bachelor's degree;Master's degree;Doctor's degree - research/scholarship	City: Midsize	Yes	7554	6741	45%	NA	Fall 2008	$4,639	-	226152	00965100
Information Science/Studies	Advanced	Texas A & M University-Central Texas	1001 Leadership Place, Killeen, Texas 76549	tamuct.edu	4-year, Public	Bachelor's degree;Master's degree	Rural: Fringe	No	2316	1722	NA	NA	Fall 2008	NA	-	483036
Information Science/Studies	Advanced	Texas A & M University-College Station	805 Rudder Tower, College Station, Texas 77843-1244	www.tamu.edu	4-year, Public	Bachelor's degree;Master's degree;Doctor's degree - research/scholarship;Doctor's degree - professional practice	City: Small	Yes	61642	47093	79%	14%	Fall 2008	$11,725	-	228723	00363200
Information Science/Studies	Advanced	Texas Tech University	Broadway and University Avenue, Lubbock, Texas 79409-5005	www.ttu.edu	4-year, Public	Less than one year certificate;Bachelor's degree;Postbaccalaureate certificate;Master's degree;Doctor's degree - research/scholarship;Doctor's degree - professional practice	City: Midsize	Yes	35158	28632	59%	NA	Fall 2008	$13,901	-	229115	00364400
Information Science/Studies	Advanced	The University of Texas at Arlington	701 S. Nedderman Dr., Arlington, Texas 76013	WWW.UTA.EDU	4-year, Public	Less than one year certificate;Bachelor's degree;Postbaccalaureate certificate;Master's degree;Post-master's certificate;Doctor's degree - research/scholarship;Doctor's degree - professional practice	City: Large	Yes	39740	29883	42%	38%	Fall 2008	$11,622	-	228769	00365600
Information Science/Studies	Advanced	The University of Texas at Austin	110 Inner Campus Drive, Austin, Texas 78712	www.utexas.edu	4-year, Public	Less than one year certificate;Bachelor's degree;Postbaccalaureate certificate;Master's degree;Doctor's degree - research/scholarship;Doctor's degree - professional practice	City: Large	Yes	51313	39523	81%	NA	Fall 2008	$16,832	-	228778	00365800
Information Science/Studies	Advanced	The University of Texas at Dallas	800 West Campbell Road, Richardson, Texas 75080-3021	www.utdallas.edu	4-year, Public	Bachelor's degree;Postbaccalaureate certificate;Master's degree;Doctor's degree - research/scholarship;Doctor's degree - professional practice	City: Small	Yes	23095	14300	71%	16%	Fall 2008	$9,098	-	228787	00974100
Information Science/Studies	Advanced	The University of Texas at El Paso	500 W. University Ave, El Paso, Texas 79968-0691	www.utep.edu	4-year, Public	Bachelor's degree;Master's degree;Doctor's degree - research/scholarship;Doctor's degree - professional practice	City: Large	Yes	23079	19817	38%	31%	Fall 2008	$5,607	-	228796	00366100
Information Science/Studies	Advanced	The University of Texas at San Antonio	One UTSA Circle, San Antonio, Texas 78249-1644	www.utsa.edu/	4-year, Public	Bachelor's degree;Master's degree;Doctor's degree - research/scholarship	City: Large	Yes	28628	24285	31%	35%	Fall 2008	$10,787	-	229027	01011500
Information Science/Studies	Advanced	The University of Texas-Pan American	1201 W University Dr, Edinburg, Texas 78539-2999	www.utpa.edu	4-year, Public	Bachelor's degree;Postbaccalaureate certificate;Master's degree;Doctor's degree - research/scholarship	City: Small	Yes	21015	17858	43%	NA	Fall 2008	$3,006	-	227368	00359900
Information Science/Studies	Advanced	Towson University	8000 York Rd, Towson, Maryland 21252-0001	www.towson.edu	4-year, Public	Bachelor's degree;Postbaccalaureate certificate;Master's degree;Post-master's certificate;Doctor's degree - research/scholarship;Doctor's degree - professional practice	City: Small	Yes	22285	18807	68%	22%	Fall 2008	$13,859	-	164076	00209900
Information Science/Studies	Advanced	University of Advancing Technology	2625 W Baseline Rd, Tempe, Arizona 85283	www.uat.edu	4-year, Private for-profit	Associate's degree;Bachelor's degree;Master's degree	City: Midsize	Yes	819	784	31%	13%	Fall 2008	$28,045	-	363934	02559000
Information Science/Studies	Advanced	University of Akron Main Campus	302 Buchtel Common, Akron, Ohio 44325-4702	www.uakron.edu	4-year, Public	Less than one year certificate;One but less than two years certificate;Associate's degree;Bachelor's degree;Postbaccalaureate certificate;Master's degree;Post-master's certificate;Doctor's degree - research/scholarship;Doctor's degree - professional practice	City: Midsize	Yes	23962	19710	42%	26%	Fall 2008	$16,111	-	200800	00312300
Information Science/Studies	Advanced	University of California-Berkeley	200 California Hall, Berkeley, California 94720	www.berkeley.edu	4-year, Public	Bachelor's degree;Postbaccalaureate certificate;Master's degree;Doctor's degree - research/scholarship;Doctor's degree - professional practice	City: Midsize	Yes	37565	27126	91%	NA	Fall 2008	$16,655	-	110635	00131200
Information Science/Studies	Advanced	University of California-Los Angeles	405 Hilgard Ave, Los Angeles, California 90095-1405	www.ucla.edu/	4-year, Public	Bachelor's degree;Master's degree;Doctor's degree - research/scholarship;Doctor's degree - professional practice	City: Large	Yes	41845	29633	91%	NA	Fall 2008	$12,510	-	110662	00131500
Information Science/Studies	Advanced	University of Colorado Boulder	Regent Drive at Broadway, Boulder, Colorado 80309-0017	www.colorado.edu	4-year, Public	Bachelor's degree;Postbaccalaureate certificate;Master's degree;Post-master's certificate;Doctor's degree - research/scholarship;Doctor's degree - professional practice	City: Small	Yes	32432	26557	70%	21%	Fall 2008	$21,053	-	126614	00137000
Information Science/Studies	Advanced	University of Colorado Denver	1380 Lawrence Street, Lawrence Street Center, Suite 1400, Denver, Colorado 80217-3364	www.ucdenver.edu/	4-year, Public	Bachelor's degree;Master's degree;Post-master's certificate;Doctor's degree - research/scholarship;Doctor's degree - professional practice	City: Large	Yes	22791	13509	40%	37%	Fall 2008	$13,518	-	126562	00450800
Information Science/Studies	Advanced	University of Delaware	104 Hullihen Hall, Newark, Delaware 19716	www.udel.edu/	4-year, Public	Associate's degree;Bachelor's degree;Master's degree;Doctor's degree - research/scholarship;Doctor's degree - professional practice	Suburb: Large	Yes	22680	18951	79%	NA	Fall 2008	$15,407	-	130943	00143100
Information Science/Studies	Advanced	University of Denver	2199 S. University Blvd, Denver, Colorado 80208	www.du.edu	4-year, Private not-for-profit	Less than one year certificate;Bachelor's degree;Postbaccalaureate certificate;Master's degree;Post-master's certificate;Doctor's degree - research/scholarship;Doctor's degree - professional practice	City: Large	Yes	11809	5643	76%	NA	Fall 2008	$33,625	-	127060	00137100
Information Science/Studies	Advanced	University of Houston-Clear Lake	2700 Bay Area Blvd, Houston, Texas 77058-1002	prtl.uhcl.edu/portal/page/portal/HOMEPAGE	4-year, Public	Bachelor's degree;Master's degree;Doctor's degree - research/scholarship	Suburb: Large	Yes	8665	5077	NA	NA	Fall 2008	NA	-	225414	01171100
Information Science/Studies	Advanced	University of Houston-Victoria	3007 N. Ben Wilson, Victoria, Texas 77901	www.uhv.edu	4-year, Public	Bachelor's degree;Master's degree	City: Small	Yes	4407	3012	NA	NA	Fall 2008	$10,131	-	225502	01323100
Information Science/Studies	Advanced	University of Illinois at Urbana-Champaign	601 E John Street, Champaign, Illinois 61820-5711	www.illinois.edu/	4-year, Public	Two but less than 4 years certificate;Bachelor's degree;Master's degree;Post-master's certificate;Doctor's degree - research/scholarship;Doctor's degree - professional practice	City: Small	Yes	45140	32959	84%	NA	Fall 2008	$16,249	-	145637	00177500
Information Science/Studies	Advanced	University of Mary Hardin-Baylor	900 College St, Belton, Texas 76513-2599	www.umhb.edu	4-year, Private not-for-profit	Bachelor's degree;Postbaccalaureate certificate;Master's degree;Post-master's certificate;Doctor's degree - research/scholarship	Suburb: Small	Yes	3740	3110	48%	NA	Fall 2008	$23,307	-	226471	00358800
Information Science/Studies	Advanced	University of Maryland-Baltimore County	1000 Hilltop Circle, Baltimore, Maryland 21250	www.umbc.edu	4-year, Public	Bachelor's degree;Postbaccalaureate certificate;Master's degree;Doctor's degree - research/scholarship	Suburb: Large	Yes	13979	11379	61%	25%	Fall 2008	$14,137	-	163268	00210500
Information Science/Studies	Advanced	University of Maryland-College Park	College Park, Maryland 20742	www.umd.edu	4-year, Public	Two but less than 4 years certificate;Bachelor's degree;Postbaccalaureate certificate;Master's degree;Post-master's certificate;Doctor's degree - research/scholarship;Doctor's degree - professional practice	Suburb: Large	Yes	37610	27056	85%	6%	Fall 2008	$14,833	-	163286	00210300
Information Science/Studies	Advanced	University of Maryland-University College	3501 University Blvd East, Adelphi, Maryland 20783-8010	www.umuc.edu	4-year, Public	Associate's degree;Two but less than 4 years certificate;Bachelor's degree;Postbaccalaureate certificate;Master's degree;Doctor's degree - professional practice	Suburb: Large	No	47906	35154	8%	23%	Fall 2008	$10,588	-	163204	01164400
Information Science/Studies	Advanced	University of Michigan-Ann Arbor	503 Thompson Street, Ann Arbor, Michigan 48109	www.umich.edu	4-year, Public	Bachelor's degree;Postbaccalaureate certificate;Master's degree;Post-master's certificate;Doctor's degree - research/scholarship;Doctor's degree - professional practice	City: Midsize	Yes	43625	28395	91%	NA	Fall 2008	$15,850	-	170976	00232500
Information Science/Studies	Advanced	University of Michigan-Dearborn	4901 Evergreen Rd, Dearborn, Michigan 48128-1491	www.umd.umich.edu/	4-year, Public	Bachelor's degree;Master's degree;Doctor's degree - research/scholarship	City: Small	No	8923	7171	50%	NA	Fall 2008	$12,347	-	171137	00232600
Information Science/Studies	Advanced	University of Nebraska at Omaha	6001 Dodge St, Omaha, Nebraska 68182-0225	www.unomaha.edu	4-year, Public	Bachelor's degree;Postbaccalaureate certificate;Master's degree;Post-master's certificate;Doctor's degree - research/scholarship	City: Large	Yes	15227	12221	45%	31%	Fall 2008	$10,979	-	181394	00255400
Information Science/Studies	Advanced	University of Nevada-Las Vegas	4505 S Maryland Pky, Las Vegas, Nevada 89154	www.unlv.edu/	4-year, Public	Two but less than 4 years certificate;Bachelor's degree;Postbaccalaureate certificate;Master's degree;Post-master's certificate;Doctor's degree - research/scholarship;Doctor's degree - professional practice	City: Midsize	Yes	28515	23803	39%	NA	Fall 2008	$12,240	-	182281	00256900
Information Science/Studies	Advanced	University of North Carolina at Chapel Hill	103 South Bldg Cb 9100, Chapel Hill, North Carolina 27599	www.unc.edu	4-year, Public	One but less than two years certificate;Bachelor's degree;Postbaccalaureate certificate;Master's degree;Post-master's certificate;Doctor's degree - research/scholarship;Doctor's degree - professional practice	City: Small	Yes	29135	18350	90%	2%	Fall 2008	$10,936	-	199120	00297400
Information Science/Studies	Advanced	University of North Texas	1501 W.Chestnut Ave., Denton, Texas 76203-1277	www.unt.edu	4-year, Public	Two but less than 4 years certificate;Bachelor's degree;Postbaccalaureate certificate;Master's degree;Doctor's degree - research/scholarship;Doctor's degree - professional practice	City: Midsize	Yes	36486	29758	50%	30%	Fall 2008	$10,827	-	227216	00359400
Information Science/Studies	Advanced	University of Pittsburgh-Pittsburgh Campus	4200 Fifth Avenue, Pittsburgh, Pennsylvania 15260	www.pitt.edu	4-year, Public	Less than one year certificate;Two but less than 4 years certificate;Bachelor's degree;Postbaccalaureate certificate;Master's degree;Post-master's certificate;Doctor's degree - research/scholarship;Doctor's degree - professional practice	City: Large	Yes	28617	18757	82%	NA	Fall 2008	$23,489	-	215293	00337900
Information Science/Studies	Advanced	University of Puerto Rico-Rio Piedras	39 Ponce de Leon Ave, San Juan, Puerto Rico 00931-0000	www.uprrp.edu	4-year, Public	Bachelor's degree;Postbaccalaureate certificate;Master's degree;Post-master's certificate;Doctor's degree - research/scholarship;Doctor's degree - professional practice	City: Large	Yes	15659	12362	47%	3%	Fall 2008	$2,318	-	243221	00710800
Information Science/Studies	Advanced	University of Redlands	1200 E. Colton Ave, Redlands, California 92373-0999	www.redlands.edu	4-year, Private not-for-profit	Less than one year certificate;Bachelor's degree;Postbaccalaureate certificate;Master's degree;Post-master's certificate;Doctor's degree - research/scholarship	City: Small	Yes	5333	3779	69%	NA	Fall 2008	$30,543	-	121691	00132200
Information Science/Studies	Advanced	University of Toledo	2801 W Bancroft, Toledo, Ohio 43606-3390	www.utoledo.edu/	4-year, Public	Less than one year certificate;One but less than two years certificate;Associate's degree;Bachelor's degree;Postbaccalaureate certificate;Master's degree;Post-master's certificate;Doctor's degree - research/scholarship;Doctor's degree - professional practice;Doctor's degree - other	City: Large	Yes	20626	16090	44%	NA	Fall 2008	$14,722	-	206084	00313100
Information Science/Studies	Advanced	University of Utah	201 Presidents Circle, ROOM 201, Salt Lake City, Utah 84112-9008	www.utah.edu	4-year, Public	Bachelor's degree;Postbaccalaureate certificate;Master's degree;Post-master's certificate;Doctor's degree - research/scholarship;Doctor's degree - professional practice	City: Midsize	Yes	31515	23907	62%	NA	Fall 2008	$11,277	-	230764	00367500
Information Science/Studies	Advanced	University of Washington-Seattle Campus	1400 NE Campus Parkway, Seattle, Washington 98195-4550	www.washington.edu	4-year, Public	Bachelor's degree;Master's degree;Post-master's certificate;Doctor's degree - research/scholarship;Doctor's degree - professional practice	City: Large	Yes	44784	30672	84%	NA	Fall 2008	$10,374	-	236948	00379800
Information Science/Studies	Advanced	University of Wisconsin-Milwaukee	2200 E Kenwood Blvd, Milwaukee, Wisconsin 53201-0413	www.uwm.edu	4-year, Public	Two but less than 4 years certificate;Bachelor's degree;Postbaccalaureate certificate;Master's degree;Post-master's certificate;Doctor's degree - research/scholarship;Doctor's degree - professional practice	City: Large	Yes	27596	22674	44%	NA	Fall 2008	$13,940	-	240453	00389600
Information Science/Studies	Advanced	Utah State University	Old Main Hill, Logan, Utah 84322-1400	www.usu.edu	4-year, Public	One but less than two years certificate;Associate's degree;Bachelor's degree;Postbaccalaureate certificate;Master's degree;Doctor's degree - research/scholarship;Doctor's degree - professional practice	City: Small	Yes	27662	24271	50%	NA	Fall 2008	$12,184	-	230728	00367700
Information Science/Studies	Advanced	Virginia Commonwealth University	910 W Franklin St, Richmond, Virginia 23284-2512	www.vcu.edu/	4-year, Public	Two but less than 4 years certificate;Bachelor's degree;Postbaccalaureate certificate;Master's degree;Post-master's certificate;Doctor's degree - research/scholarship;Doctor's degree - professional practice	City: Midsize	Yes	30848	23661	59%	26%	Fall 2008	$19,335	-	234030	00373500
Information Science/Studies	Advanced	Virginia Polytechnic Institute and State University	210 Burruss Hall, 800 Drillfield Dr., Blacksburg, Virginia 24061-0131	WWW.VT.EDU	4-year, Public	Associate's degree;Bachelor's degree;Master's degree;Post-master's certificate;Doctor's degree - research/scholarship;Doctor's degree - professional practice	City: Small	Yes	31224	24247	83%	NA	Fall 2008	$18,398	-	233921	00375400
Information Science/Studies	Advanced	Virginia State University	1 Hayden Drive, Petersburg, Virginia 23806	www.vsu.edu	4-year, Public	Associate's degree;Bachelor's degree;Postbaccalaureate certificate;Master's degree;Doctor's degree - research/scholarship	Suburb: Large	Yes	5025	4498	42%	NA	Fall 2008	$15,042	-	234155	00376400
Information Science/Studies	Advanced	Walden University	100 Washington Avenue South, Suite 900, Minneapolis, Minnesota 55401	www.waldenu.edu	4-year, Private for-profit	Less than one year certificate;Bachelor's degree;Postbaccalaureate certificate;Master's degree;Post-master's certificate;Doctor's degree - research/scholarship	City: Large	No	52188	8960	33%	NA	Fall 2008	$27,851	-	125231	02504200
Information Science/Studies	Advanced	Western New England University	1215 Wilbraham Rd, Springfield, Massachusetts 01119-2684	www.wne.edu	4-year, Private not-for-profit	Less than one year certificate;Associate's degree;Bachelor's degree;Postbaccalaureate certificate;Master's degree;Doctor's degree - research/scholarship;Doctor's degree - professional practice	City: Midsize	Yes	3922	2732	59%	26%	Fall 2008	$28,644	-	168254	00222600
Information Science/Studies	Advanced	Widener University-Main Campus	One University Place, Chester, Pennsylvania 19013-5792	www.widener.edu	4-year, Private not-for-profit	Associate's degree;Bachelor's degree;Postbaccalaureate certificate;Master's degree;Post-master's certificate;Doctor's degree - research/scholarship;Doctor's degree - professional practice	Suburb: Large	Yes	4912	3350	53%	26%	Fall 2008	$27,473	-	216852	00331300
		* Cohort Year represents the year for which students began their studies and applies to Graduation and Transfer Out Rates.
		** Net Price is Average Net Price for 2013-2014 generated for full-time beginning undergraduate students who were awarded grant or scholarship aid from federal, state or local governments, or the institution. For public institutions only students paying the in-state or in-district rate are included. For institutions that charge students by program, net price is generated for the institution’s lar…
		NA (Not applicable) - Graduation rate, transfer-out rate and the net price are not applicable to institutions that do not have full-time, first-time degree-seeking undergraduate students in the applicable cohort year or the financial aid year.
		National Center for Education Statistics
		College Navigator
		Generated at:9/4/2015 11:38:22 AM from URL:http://nces.ed.gov/collegenavigator/default.aspx?s=all&p=26.1502+26.1503+26.1504+26.1599+26.1003+26.1501&l=91&xp=1
		Name	Address	Website	Type	Awards offered	Campus setting	Campus housing	Student population	Undergraduate students	Graduation Rate	Transfer-Out Rate	Cohort Year *	Net Price **	Largest Program	IPEDS ID	OPE ID
Neuroanatomy; Neurobiology and Anatomy; Neurobiology and Behavior; Neurobiology and Neurosciences, Other; Neuropharmacology; Neuroscience	Certificate	Bethel College-North Newton	300 E 27th St, North Newton, Kansas 67117-1716	www.bethelks.edu	4-year, Private not-for-profit	Less than one year certificate;Bachelor's degree	Town: Distant	Yes	483	483	58%	NA	Fall 2008	$18,745	-	154749	00190500
Neuroanatomy; Neurobiology and Anatomy; Neurobiology and Behavior; Neurobiology and Neurosciences, Other; Neuropharmacology; Neuroscience	Certificate	Morehouse College	830 Westview Dr SW, Atlanta, Georgia 30314	www.morehouse.edu	4-year, Private not-for-profit	Less than one year certificate;Bachelor's degree	City: Large	Yes	2109	2109	53%	NA	Fall 2008	$31,707	-	140553	00158200
Neuroanatomy; Neurobiology and Anatomy; Neurobiology and Behavior; Neurobiology and Neurosciences, Other; Neuropharmacology; Neuroscience	Certificate	Providence College	1 Cunningham Square, Providence, Rhode Island 02918-0001	www.providence.edu	4-year, Private not-for-profit	Less than one year certificate;One but less than two years certificate;Associate's degree;Bachelor's degree;Master's degree	City: Midsize	Yes	4533	4022	86%	4%	Fall 2008	$33,825	-	217402	00340600
Neuroanatomy; Neurobiology and Anatomy; Neurobiology and Behavior; Neurobiology and Neurosciences, Other; Neuropharmacology; Neuroscience	Certificate	University of Missouri-St Louis	One University Boulevard, Saint Louis, Missouri 63121-4400	www.umsl.edu/	4-year, Public	One but less than two years certificate;Bachelor's degree;Master's degree;Post-master's certificate;Doctor's degree - research/scholarship;Doctor's degree - professional practice	Suburb: Large	Yes	17072	13874	42%	NA	Fall 2008	$9,969	-	178420	00251900
		* Cohort Year represents the year for which students began their studies and applies to Graduation and Transfer Out Rates.
		** Net Price is Average Net Price for 2013-2014 generated for full-time beginning undergraduate students who were awarded grant or scholarship aid from federal, state or local governments, or the institution. For public institutions only students paying the in-state or in-district rate are included. For institutions that charge students by program, net price is generated for the institution’s lar…
		NA (Not applicable) - Graduation rate, transfer-out rate and the net price are not applicable to institutions that do not have full-time, first-time degree-seeking undergraduate students in the applicable cohort year or the financial aid year.
		National Center for Education Statistics
		College Navigator
		Generated at:9/4/2015 11:39:19 AM from URL:http://nces.ed.gov/collegenavigator/default.aspx?s=all&p=26.1502+26.1503+26.1504+26.1599+26.1003+26.1501&l=93&xp=1
		Name	Address	Website	Type	Awards offered	Campus setting	Campus housing	Student population	Undergraduate students	Graduation Rate	Transfer-Out Rate	Cohort Year *	Net Price **	Largest Program	IPEDS ID	OPE ID
Neuroanatomy; Neurobiology and Anatomy; Neurobiology and Behavior; Neurobiology and Neurosciences, Other; Neuropharmacology; Neuroscience	Bachelors	Agnes Scott College	141 E. College Ave., Decatur, Georgia 30030-3770	www.agnesscott.edu	4-year, Private not-for-profit	Bachelor's degree	Suburb: Large	Yes	873	873	73%	NA	Fall 2008	$20,378	-	138600	00154200
Neuroanatomy; Neurobiology and Anatomy; Neurobiology and Behavior; Neurobiology and Neurosciences, Other; Neuropharmacology; Neuroscience	Bachelors	Allegheny College	520 N Main St, Meadville, Pennsylvania 16335-3902	www.allegheny.edu	4-year, Private not-for-profit	Bachelor's degree	Town: Distant	Yes	2023	2023	78%	NA	Fall 2008	$27,773	-	210669	00323000
Neuroanatomy; Neurobiology and Anatomy; Neurobiology and Behavior; Neurobiology and Neurosciences, Other; Neuropharmacology; Neuroscience	Bachelors	Amherst College	Boltwood Avenue, Amherst, Massachusetts 01002-5000	www.amherst.edu	4-year, Private not-for-profit	Bachelor's degree	Suburb: Large	Yes	1792	1792	94%	3%	Fall 2008	$14,687	-	164465	00211500
Neuroanatomy; Neurobiology and Anatomy; Neurobiology and Behavior; Neurobiology and Neurosciences, Other; Neuropharmacology; Neuroscience	Bachelors	Augustana College	639 38th St, Rock Island, Illinois 61201-2296	www.augustana.edu	4-year, Private not-for-profit	Bachelor's degree	City: Small	Yes	2497	2497	74%	NA	Fall 2008	$24,651	-	143084	00163300
Neuroanatomy; Neurobiology and Anatomy; Neurobiology and Behavior; Neurobiology and Neurosciences, Other; Neuropharmacology; Neuroscience	Bachelors	Baldwin Wallace University	275 Eastland Rd, Berea, Ohio 44017-2088	www.bw.edu	4-year, Private not-for-profit	Less than one year certificate;Bachelor's degree;Master's degree	Suburb: Large	Yes	3979	3362	68%	NA	Fall 2008	$20,360	-	201195	00301400
Neuroanatomy; Neurobiology and Anatomy; Neurobiology and Behavior; Neurobiology and Neurosciences, Other; Neuropharmacology; Neuroscience	Bachelors	Barnard College	3009 Broadway, New York, New York 10027-6598	www.barnard.edu	4-year, Private not-for-profit	Bachelor's degree	City: Large	Yes	2573	2573	89%	7%	Fall 2008	$21,791	-	189097	00270800
Neuroanatomy; Neurobiology and Anatomy; Neurobiology and Behavior; Neurobiology and Neurosciences, Other; Neuropharmacology; Neuroscience	Bachelors	Bates College	2 Andrews Road, Lewiston, Maine 04240	www.bates.edu/	4-year, Private not-for-profit	Bachelor's degree	City: Small	Yes	1773	1773	88%	8%	Fall 2008	$22,062	-	160977	00203600
Neuroanatomy; Neurobiology and Anatomy; Neurobiology and Behavior; Neurobiology and Neurosciences, Other; Neuropharmacology; Neuroscience	Bachelors	Baylor University	500 Speight Ave., Waco, Texas 76798	www.baylor.edu	4-year, Private not-for-profit	Bachelor's degree;Master's degree;Post-master's certificate;Doctor's degree - research/scholarship;Doctor's degree - professional practice	City: Midsize	Yes	16263	13859	72%	NA	Fall 2008	$34,900	-	223232	00354500
Neuroanatomy; Neurobiology and Anatomy; Neurobiology and Behavior; Neurobiology and Neurosciences, Other; Neuropharmacology; Neuroscience	Bachelors	Belmont University	1900 Belmont Blvd, Nashville, Tennessee 37212-3757	www.belmont.edu	4-year, Private not-for-profit	Bachelor's degree;Master's degree;Doctor's degree - professional practice	City: Large	Yes	7244	5837	70%	24%	Fall 2008	$30,581	-	219709	00347900
Neuroanatomy; Neurobiology and Anatomy; Neurobiology and Behavior; Neurobiology and Neurosciences, Other; Neuropharmacology; Neuroscience	Bachelors	Boston University	One Silber Way, Boston, Massachusetts 02215	www.bu.edu	4-year, Private not-for-profit	Bachelor's degree;Postbaccalaureate certificate;Master's degree;Post-master's certificate;Doctor's degree - research/scholarship;Doctor's degree - professional practice	City: Large	Yes	32112	18017	85%	NA	Fall 2008	$32,539	-	164988	00213000
Neuroanatomy; Neurobiology and Anatomy; Neurobiology and Behavior; Neurobiology and Neurosciences, Other; Neuropharmacology; Neuroscience	Bachelors	Bowdoin College	255 Maine Street, Brunswick, Maine 04011	www.bowdoin.edu/	4-year, Private not-for-profit	Bachelor's degree	Town: Fringe	Yes	1805	1805	93%	NA	Fall 2008	$22,289	-	161004	00203800
Neuroanatomy; Neurobiology and Anatomy; Neurobiology and Behavior; Neurobiology and Neurosciences, Other; Neuropharmacology; Neuroscience	Bachelors	Bowling Green State University-Main Campus	220 McFall Ctr, Bowling Green, Ohio 43403	www.bgsu.edu	4-year, Public	Bachelor's degree;Postbaccalaureate certificate;Master's degree;Post-master's certificate;Doctor's degree - research/scholarship	Town: Fringe	Yes	16554	14099	55%	31%	Fall 2008	$17,042	-	201441	00301800
Neuroanatomy; Neurobiology and Anatomy; Neurobiology and Behavior; Neurobiology and Neurosciences, Other; Neuropharmacology; Neuroscience	Bachelors	Brandeis University	415 South St, Waltham, Massachusetts 02454-9110	www.brandeis.edu/	4-year, Private not-for-profit	Bachelor's degree;Master's degree;Doctor's degree - research/scholarship	City: Small	Yes	5945	3729	91%	NA	Fall 2008	$26,367	-	165015	00213300
Neuroanatomy; Neurobiology and Anatomy; Neurobiology and Behavior; Neurobiology and Neurosciences, Other; Neuropharmacology; Neuroscience	Bachelors	Brigham Young University-Provo	Main Campus, Provo, Utah 84602	www.byu.edu	4-year, Private not-for-profit	Bachelor's degree;Postbaccalaureate certificate;Master's degree;Post-master's certificate;Doctor's degree - research/scholarship;Doctor's degree - professional practice	City: Midsize	Yes	30484	27163	79%	NA	Fall 2008	$12,335	-	230038	00367000
Neuroanatomy; Neurobiology and Anatomy; Neurobiology and Behavior; Neurobiology and Neurosciences, Other; Neuropharmacology; Neuroscience	Bachelors	Brown University	One Prospect Street, Providence, Rhode Island 02912	www.brown.edu	4-year, Private not-for-profit	Bachelor's degree;Master's degree;Doctor's degree - research/scholarship;Doctor's degree - professional practice	City: Midsize	Yes	9181	6548	96%	NA	Fall 2008	$21,193	-	217156	00340100
Neuroanatomy; Neurobiology and Anatomy; Neurobiology and Behavior; Neurobiology and Neurosciences, Other; Neuropharmacology; Neuroscience	Bachelors	Bucknell University	One Dent Drive, Lewisburg, Pennsylvania 17837	www.bucknell.edu	4-year, Private not-for-profit	Bachelor's degree;Master's degree	Town: Distant	Yes	3624	3565	89%	6%	Fall 2008	$33,127	-	211291	00323800
Neuroanatomy; Neurobiology and Anatomy; Neurobiology and Behavior; Neurobiology and Neurosciences, Other; Neuropharmacology; Neuroscience	Bachelors	California Institute of Technology	1200 E California Blvd, Pasadena, California 91125	www.caltech.edu	4-year, Private not-for-profit	Bachelor's degree;Master's degree;Post-master's certificate;Doctor's degree - research/scholarship	City: Midsize	Yes	2209	983	92%	NA	Fall 2008	$26,910	-	110404	00113100
Neuroanatomy; Neurobiology and Anatomy; Neurobiology and Behavior; Neurobiology and Neurosciences, Other; Neuropharmacology; Neuroscience	Bachelors	Carleton College	One North College Street, Northfield, Minnesota 55057-4001	www.carleton.edu	4-year, Private not-for-profit	Bachelor's degree	Town: Distant	Yes	2057	2057	93%	NA	Fall 2008	$32,017	-	173258	00234000
Neuroanatomy; Neurobiology and Anatomy; Neurobiology and Behavior; Neurobiology and Neurosciences, Other; Neuropharmacology; Neuroscience	Bachelors	Carnegie Mellon University	5000 Forbes Avenue, Pittsburgh, Pennsylvania 15213-3890	www.cmu.edu/	4-year, Private not-for-profit	Bachelor's degree;Postbaccalaureate certificate;Master's degree;Post-master's certificate;Doctor's degree - research/scholarship	City: Large	Yes	12587	5888	88%	NA	Fall 2008	$33,670	-	211440	00324200
Neuroanatomy; Neurobiology and Anatomy; Neurobiology and Behavior; Neurobiology and Neurosciences, Other; Neuropharmacology; Neuroscience	Bachelors	Carthage College	2001 Alford Park Dr, Kenosha, Wisconsin 53140-1994	www.carthage.edu	4-year, Private not-for-profit	Bachelor's degree;Master's degree	Suburb: Midsize	Yes	2948	2856	61%	NA	Fall 2008	$27,385	-	238476	00383900
Neuroanatomy; Neurobiology and Anatomy; Neurobiology and Behavior; Neurobiology and Neurosciences, Other; Neuropharmacology; Neuroscience	Bachelors	Cedar Crest College	100 College Drive, Allentown, Pennsylvania 18104-6196	www.cedarcrest.edu	4-year, Private not-for-profit	Less than one year certificate;One but less than two years certificate;Two but less than 4 years certificate;Bachelor's degree;Postbaccalaureate certificate;Master's degree	City: Midsize	Yes	1531	1342	69%	3%	Fall 2008	$17,981	-	211468	00324300
Neuroanatomy; Neurobiology and Anatomy; Neurobiology and Behavior; Neurobiology and Neurosciences, Other; Neuropharmacology; Neuroscience	Bachelors	Centenary College of Louisiana	2911 Centenary Boulevard, Shreveport, Louisiana 71134-1188	www.centenary.edu	4-year, Private not-for-profit	Bachelor's degree;Master's degree	City: Midsize	Yes	619	553	52%	NA	Fall 2008	$22,420	-	158477	00200300
Neuroanatomy; Neurobiology and Anatomy; Neurobiology and Behavior; Neurobiology and Neurosciences, Other; Neuropharmacology; Neuroscience	Bachelors	Central Michigan University	106 Warriner Hall, Mount Pleasant, Michigan 48859	www.cmich.edu	4-year, Public	Bachelor's degree;Postbaccalaureate certificate;Master's degree;Post-master's certificate;Doctor's degree - research/scholarship;Doctor's degree - professional practice	Town: Distant	Yes	26879	20671	56%	NA	Fall 2008	$13,580	-	169248	00224300
Neuroanatomy; Neurobiology and Anatomy; Neurobiology and Behavior; Neurobiology and Neurosciences, Other; Neuropharmacology; Neuroscience	Bachelors	Claremont McKenna College	500 E 9th St, Claremont, California 91711-6400	www.claremontmckenna.edu/	4-year, Private not-for-profit	Bachelor's degree;Master's degree	Suburb: Large	Yes	1324	1301	90%	NA	Fall 2008	$23,982	-	112260	00117000
Neuroanatomy; Neurobiology and Anatomy; Neurobiology and Behavior; Neurobiology and Neurosciences, Other; Neuropharmacology; Neuroscience	Bachelors	Coe College	1220 First Ave NE, Cedar Rapids, Iowa 52402-5092	www.coe.edu	4-year, Private not-for-profit	Bachelor's degree;Master's degree	City: Midsize	Yes	1436	1435	70%	NA	Fall 2008	$22,121	-	153144	00185400
Neuroanatomy; Neurobiology and Anatomy; Neurobiology and Behavior; Neurobiology and Neurosciences, Other; Neuropharmacology; Neuroscience	Bachelors	Colby College	4000 Mayflower Hill Drive, Waterville, Maine 04901-8840	www.colby.edu	4-year, Private not-for-profit	Bachelor's degree	Town: Remote	Yes	1847	1847	90%	7%	Fall 2008	$18,477	-	161086	00203900
Neuroanatomy; Neurobiology and Anatomy; Neurobiology and Behavior; Neurobiology and Neurosciences, Other; Neuropharmacology; Neuroscience	Bachelors	Colgate University	13 Oak Dr, Hamilton, New York 13346-1398	www.colgate.edu	4-year, Private not-for-profit	Bachelor's degree;Master's degree	Town: Distant	Yes	2888	2875	92%	5%	Fall 2008	$21,649	-	190099	00270100
Neuroanatomy; Neurobiology and Anatomy; Neurobiology and Behavior; Neurobiology and Neurosciences, Other; Neuropharmacology; Neuroscience	Bachelors	College of William and Mary	200 Richmond Road, Williamsburg, Virginia 23187-8795	www.wm.edu	4-year, Public	Bachelor's degree;Postbaccalaureate certificate;Master's degree;Post-master's certificate;Doctor's degree - research/scholarship;Doctor's degree - professional practice	Suburb: Small	Yes	8437	6299	90%	8%	Fall 2008	$12,406	-	231624	00370500
Neuroanatomy; Neurobiology and Anatomy; Neurobiology and Behavior; Neurobiology and Neurosciences, Other; Neuropharmacology; Neuroscience	Bachelors	Colorado College	14. E Cache La Poudre St., Colorado Springs, Colorado 80903	www.coloradocollege.edu	4-year, Private not-for-profit	Bachelor's degree;Master's degree	City: Large	Yes	2067	2050	86%	NA	Fall 2008	$24,141	-	126678	00134700
Neuroanatomy; Neurobiology and Anatomy; Neurobiology and Behavior; Neurobiology and Neurosciences, Other; Neuropharmacology; Neuroscience	Bachelors	Columbia University in the City of New York	West 116 St and Broadway, New York, New York 10027	www.columbia.edu	4-year, Private not-for-profit	Bachelor's degree;Postbaccalaureate certificate;Master's degree;Post-master's certificate;Doctor's degree - research/scholarship;Doctor's degree - professional practice	City: Large	Yes	27589	8100	95%	NA	Fall 2008	$20,838	-	190150	00270700
Neuroanatomy; Neurobiology and Anatomy; Neurobiology and Behavior; Neurobiology and Neurosciences, Other; Neuropharmacology; Neuroscience	Bachelors	Connecticut College	270 Mohegan Avenue, New London, Connecticut 06320-4196	www.connecticutcollege.edu	4-year, Private not-for-profit	Bachelor's degree;Master's degree	City: Small	Yes	1900	1893	83%	NA	Fall 2008	$24,152	-	128902	00137900
Neuroanatomy; Neurobiology and Anatomy; Neurobiology and Behavior; Neurobiology and Neurosciences, Other; Neuropharmacology; Neuroscience	Bachelors	Dartmouth College	207 Parkhurst Hall, Hanover, New Hampshire 03755-3529	www.dartmouth.edu	4-year, Private not-for-profit	Bachelor's degree;Master's degree;Doctor's degree - research/scholarship;Doctor's degree - professional practice	Town: Remote	Yes	6298	4289	95%	NA	Fall 2008	$21,277	-	182670	00257300
Neuroanatomy; Neurobiology and Anatomy; Neurobiology and Behavior; Neurobiology and Neurosciences, Other; Neuropharmacology; Neuroscience	Bachelors	Dickinson College	College and Louther Streets, Carlisle, Pennsylvania 17013-2896	www.dickinson.edu	4-year, Private not-for-profit	Bachelor's degree	City: Small	Yes	2364	2364	84%	NA	Fall 2008	$33,457	-	212009	00325300
Neuroanatomy; Neurobiology and Anatomy; Neurobiology and Behavior; Neurobiology and Neurosciences, Other; Neuropharmacology; Neuroscience	Bachelors	Dominican University	7900 W Division Street, River Forest, Illinois 60305	www.dom.edu/	4-year, Private not-for-profit	One but less than two years certificate;Bachelor's degree;Postbaccalaureate certificate;Master's degree;Post-master's certificate;Doctor's degree - research/scholarship	Suburb: Large	Yes	3498	2180	63%	32%	Fall 2008	$16,505	-	148496	00175000
Neuroanatomy; Neurobiology and Anatomy; Neurobiology and Behavior; Neurobiology and Neurosciences, Other; Neuropharmacology; Neuroscience	Bachelors	Drake University	2507 University Avenue, Des Moines, Iowa 50311-4505	www.drake.edu	4-year, Private not-for-profit	Bachelor's degree;Master's degree;Post-master's certificate;Doctor's degree - research/scholarship;Doctor's degree - professional practice	City: Midsize	Yes	5062	3364	78%	NA	Fall 2008	$27,052	-	153269	00186000
Neuroanatomy; Neurobiology and Anatomy; Neurobiology and Behavior; Neurobiology and Neurosciences, Other; Neuropharmacology; Neuroscience	Bachelors	Drew University	36 Madison Ave, Madison, New Jersey 07940	www.drew.edu	4-year, Private not-for-profit	Bachelor's degree;Postbaccalaureate certificate;Master's degree;Post-master's certificate;Doctor's degree - research/scholarship;Doctor's degree - professional practice	Suburb: Large	Yes	2113	1417	62%	NA	Fall 2008	$27,102	-	184348	00260300
Neuroanatomy; Neurobiology and Anatomy; Neurobiology and Behavior; Neurobiology and Neurosciences, Other; Neuropharmacology; Neuroscience	Bachelors	Duke University	103 Allen Bldg, Durham, North Carolina 27708	WWW.DUKE.EDU	4-year, Private not-for-profit	Bachelor's degree;Postbaccalaureate certificate;Master's degree;Doctor's degree - research/scholarship;Doctor's degree - professional practice	City: Midsize	Yes	15856	6626	95%	NA	Fall 2008	$21,764	-	198419	00292000
Neuroanatomy; Neurobiology and Anatomy; Neurobiology and Behavior; Neurobiology and Neurosciences, Other; Neuropharmacology; Neuroscience	Bachelors	Earlham College	801 National Rd West, Richmond, Indiana 47374-4095	www.earlham.edu	4-year, Private not-for-profit	Bachelor's degree;Master's degree	Town: Distant	Yes	1076	993	72%	NA	Fall 2008	$20,589	-	150455	00179300
Neuroanatomy; Neurobiology and Anatomy; Neurobiology and Behavior; Neurobiology and Neurosciences, Other; Neuropharmacology; Neuroscience	Bachelors	Emmanuel College	400 The Fenway, Boston, Massachusetts 02115	www.emmanuel.edu	4-year, Private not-for-profit	Bachelor's degree;Postbaccalaureate certificate;Master's degree;Post-master's certificate	City: Large	Yes	2311	2082	64%	NA	Fall 2008	$32,294	-	165671	00214700
Neuroanatomy; Neurobiology and Anatomy; Neurobiology and Behavior; Neurobiology and Neurosciences, Other; Neuropharmacology; Neuroscience	Bachelors	Emory University	408 Administration Building, 201 Dowman Drive, Atlanta, Georgia 30322	www.emory.edu	4-year, Private not-for-profit	Associate's degree;Bachelor's degree;Postbaccalaureate certificate;Master's degree;Post-master's certificate;Doctor's degree - research/scholarship;Doctor's degree - professional practice	Suburb: Large	Yes	14769	7829	89%	NA	Fall 2008	$28,203	-	139658	00156400
Neuroanatomy; Neurobiology and Anatomy; Neurobiology and Behavior; Neurobiology and Neurosciences, Other; Neuropharmacology; Neuroscience	Bachelors	Fairfield University	1073 N Benson Rd, Fairfield, Connecticut 06824-5195	fairfield.edu/	4-year, Private not-for-profit	Bachelor's degree;Postbaccalaureate certificate;Master's degree;Post-master's certificate;Doctor's degree - professional practice	Suburb: Large	Yes	5123	3982	80%	18%	Fall 2008	$37,255	-	129242	00138500
Neuroanatomy; Neurobiology and Anatomy; Neurobiology and Behavior; Neurobiology and Neurosciences, Other; Neuropharmacology; Neuroscience	Bachelors	Fordham University	441 E Fordham Rd, Bronx, New York 10458	www.fordham.edu	4-year, Private not-for-profit	Bachelor's degree;Postbaccalaureate certificate;Master's degree;Post-master's certificate;Doctor's degree - research/scholarship;Doctor's degree - professional practice	City: Large	Yes	15231	8633	80%	NA	Fall 2008	$35,605	-	191241	00272200
Neuroanatomy; Neurobiology and Anatomy; Neurobiology and Behavior; Neurobiology and Neurosciences, Other; Neuropharmacology; Neuroscience	Bachelors	Franklin and Marshall College	College Ave, Lancaster, Pennsylvania 17604-3003	WWW.FANDM.EDU	4-year, Private not-for-profit	Bachelor's degree	City: Small	Yes	2209	2209	87%	NA	Fall 2008	$22,974	-	212577	00326500
Neuroanatomy; Neurobiology and Anatomy; Neurobiology and Behavior; Neurobiology and Neurosciences, Other; Neuropharmacology; Neuroscience	Bachelors	Furman University	3300 Poinsett Highway, Greenville, South Carolina 29613-6162	www.furman.edu	4-year, Private not-for-profit	Bachelor's degree;Master's degree;Post-master's certificate	Suburb: Large	Yes	2973	2810	84%	9%	Fall 2008	$30,607	-	218070	00343400
Neuroanatomy; Neurobiology and Anatomy; Neurobiology and Behavior; Neurobiology and Neurosciences, Other; Neuropharmacology; Neuroscience	Bachelors	George Mason University	4400 University Dr, Fairfax, Virginia 22030-4444	www.gmu.edu	4-year, Public	Bachelor's degree;Postbaccalaureate certificate;Master's degree;Post-master's certificate;Doctor's degree - research/scholarship;Doctor's degree - professional practice	Suburb: Large	Yes	33729	22349	67%	20%	Fall 2008	$17,347	-	232186	00374900
Neuroanatomy; Neurobiology and Anatomy; Neurobiology and Behavior; Neurobiology and Neurosciences, Other; Neuropharmacology; Neuroscience	Bachelors	Georgetown University	37th and O St NW, Washington, District of Columbia 20057-0001	www.georgetown.edu	4-year, Private not-for-profit	One but less than two years certificate;Bachelor's degree;Postbaccalaureate certificate;Master's degree;Doctor's degree - research/scholarship;Doctor's degree - professional practice	City: Large	Yes	17858	7595	95%	NA	Fall 2008	$25,786	-	131496	00144500
Neuroanatomy; Neurobiology and Anatomy; Neurobiology and Behavior; Neurobiology and Neurosciences, Other; Neuropharmacology; Neuroscience	Bachelors	Georgia State University	33 gilmer st, Atlanta, Georgia 30303-3083	www.gsu.edu	4-year, Public	Bachelor's degree;Postbaccalaureate certificate;Master's degree;Post-master's certificate;Doctor's degree - research/scholarship;Doctor's degree - professional practice	City: Large	Yes	32556	25328	53%	17%	Fall 2008	$15,609	-	139940	00157400
Neuroanatomy; Neurobiology and Anatomy; Neurobiology and Behavior; Neurobiology and Neurosciences, Other; Neuropharmacology; Neuroscience	Bachelors	Gordon College	255 Grapevine Rd, Wenham, Massachusetts 01984	www.gordon.edu	4-year, Private not-for-profit	Bachelor's degree;Master's degree;Post-master's certificate	Suburb: Large	Yes	2105	1741	72%	NA	Fall 2008	$29,486	-	165936	00215300
Neuroanatomy; Neurobiology and Anatomy; Neurobiology and Behavior; Neurobiology and Neurosciences, Other; Neuropharmacology; Neuroscience	Bachelors	Hamilton College	198 College Hill Rd, Clinton, New York 13323	www.hamilton.edu	4-year, Private not-for-profit	Bachelor's degree	Rural: Fringe	Yes	1904	1904	91%	3%	Fall 2008	$22,392	-	191515	00272800
Neuroanatomy; Neurobiology and Anatomy; Neurobiology and Behavior; Neurobiology and Neurosciences, Other; Neuropharmacology; Neuroscience	Bachelors	Hampshire College	893 West St, Amherst, Massachusetts 01002-5001	www.hampshire.edu	4-year, Private not-for-profit	Bachelor's degree	Suburb: Large	Yes	1376	1376	75%	NA	Fall 2008	$36,197	-	166018	00466100
Neuroanatomy; Neurobiology and Anatomy; Neurobiology and Behavior; Neurobiology and Neurosciences, Other; Neuropharmacology; Neuroscience	Bachelors	Harvard University	Massachusetts Hall, Cambridge, Massachusetts 02138	www.harvard.edu	4-year, Private not-for-profit	Associate's degree;Bachelor's degree;Postbaccalaureate certificate;Master's degree;Post-master's certificate;Doctor's degree - research/scholarship;Doctor's degree - professional practice	City: Midsize	Yes	28791	10338	98%	NA	Fall 2008	$15,095	-	166027	00215500
Neuroanatomy; Neurobiology and Anatomy; Neurobiology and Behavior; Neurobiology and Neurosciences, Other; Neuropharmacology; Neuroscience	Bachelors	Harvey Mudd College	301 Platt Blvd., Claremont, California 91711	https://www.hmc.edu	4-year, Private not-for-profit	Bachelor's degree	Suburb: Large	Yes	804	804	90%	3%	Fall 2008	$33,137	-	115409	00117100
Neuroanatomy; Neurobiology and Anatomy; Neurobiology and Behavior; Neurobiology and Neurosciences, Other; Neuropharmacology; Neuroscience	Bachelors	Hiram College	Hinsdale Hall Third Floor, Hiram, Ohio 44234-0067	WWW.HIRAM.EDU	4-year, Private not-for-profit	Bachelor's degree;Master's degree	Town: Fringe	Yes	1259	1235	63%	NA	Fall 2008	$22,194	-	203128	00304900
Neuroanatomy; Neurobiology and Anatomy; Neurobiology and Behavior; Neurobiology and Neurosciences, Other; Neuropharmacology; Neuroscience	Bachelors	Indiana University-Bloomington	107 South Indiana Ave., Bloomington, Indiana 47405-7000	www.iub.edu	4-year, Public	One but less than two years certificate;Associate's degree;Bachelor's degree;Postbaccalaureate certificate;Master's degree;Post-master's certificate;Doctor's degree - research/scholarship;Doctor's degree - professional practice	City: Small	Yes	46416	36419	78%	14%	Fall 2008	$11,573	-	151351	00180900
Neuroanatomy; Neurobiology and Anatomy; Neurobiology and Behavior; Neurobiology and Neurosciences, Other; Neuropharmacology; Neuroscience	Bachelors	Indiana University-Purdue University-Indianapolis	425 University Blvd, Indianapolis, Indiana 46202-5143	www.iupui.edu	4-year, Public	One but less than two years certificate;Associate's degree;Bachelor's degree;Postbaccalaureate certificate;Master's degree;Post-master's certificate;Doctor's degree - research/scholarship;Doctor's degree - professional practice	City: Large	Yes	30690	22525	43%	25%	Fall 2008	$10,979	-	151111	00181300
Neuroanatomy; Neurobiology and Anatomy; Neurobiology and Behavior; Neurobiology and Neurosciences, Other; Neuropharmacology; Neuroscience	Bachelors	Johns Hopkins University	3400 N Charles St, Mason Hall, Baltimore, Maryland 21218-2688	www.jhu.edu	4-year, Private not-for-profit	Two but less than 4 years certificate;Bachelor's degree;Postbaccalaureate certificate;Master's degree;Post-master's certificate;Doctor's degree - research/scholarship;Doctor's degree - professional practice	City: Large	Yes	21372	6357	93%	2%	Fall 2008	$25,207	-	162928	00207700
Neuroanatomy; Neurobiology and Anatomy; Neurobiology and Behavior; Neurobiology and Neurosciences, Other; Neuropharmacology; Neuroscience	Bachelors	Kenyon College	Kenyon College, Gambier, Ohio 43022	www.kenyon.edu/	4-year, Private not-for-profit	Bachelor's degree	Town: Distant	Yes	1662	1662	89%	NA	Fall 2008	$26,734	-	203535	00306500
Neuroanatomy; Neurobiology and Anatomy; Neurobiology and Behavior; Neurobiology and Neurosciences, Other; Neuropharmacology; Neuroscience	Bachelors	King University	1350 King College Rd, Bristol, Tennessee 37620-2699	www.king.edu	4-year, Private not-for-profit	Associate's degree;Bachelor's degree;Master's degree;Post-master's certificate;Doctor's degree - professional practice	City: Small	Yes	2897	2427	54%	NA	Fall 2008	$16,845	-	220516	00349600
Neuroanatomy; Neurobiology and Anatomy; Neurobiology and Behavior; Neurobiology and Neurosciences, Other; Neuropharmacology; Neuroscience	Bachelors	King's College	133 N River St, Wilkes-Barre, Pennsylvania 18711-0801	www.kings.edu	4-year, Private not-for-profit	Less than one year certificate;Associate's degree;Bachelor's degree;Postbaccalaureate certificate;Master's degree	City: Small	Yes	2308	2002	62%	NA	Fall 2008	$25,276	-	213321	00328200
Neuroanatomy; Neurobiology and Anatomy; Neurobiology and Behavior; Neurobiology and Neurosciences, Other; Neuropharmacology; Neuroscience	Bachelors	Knox College	2 E South St, Galesburg, Illinois 61401-9999	https://www.knox.edu	4-year, Private not-for-profit	Bachelor's degree	Town: Distant	Yes	1399	1399	80%	NA	Fall 2008	$23,642	-	146427	00170400
Neuroanatomy; Neurobiology and Anatomy; Neurobiology and Behavior; Neurobiology and Neurosciences, Other; Neuropharmacology; Neuroscience	Bachelors	Lafayette College	High St, Easton, Pennsylvania 18042-1768	www.lafayette.edu/	4-year, Private not-for-profit	Bachelor's degree	Suburb: Large	Yes	2503	2503	90%	7%	Fall 2008	$27,019	-	213385	00328400
Neuroanatomy; Neurobiology and Anatomy; Neurobiology and Behavior; Neurobiology and Neurosciences, Other; Neuropharmacology; Neuroscience	Bachelors	Lake Forest College	555 N Sheridan Road, Lake Forest, Illinois 60045-2399	www.lakeforest.edu	4-year, Private not-for-profit	Bachelor's degree;Master's degree	Suburb: Large	Yes	1626	1607	73%	NA	Fall 2008	$24,500	-	146481	00170600
Neuroanatomy; Neurobiology and Anatomy; Neurobiology and Behavior; Neurobiology and Neurosciences, Other; Neuropharmacology; Neuroscience	Bachelors	Lehigh University	27 Memorial Drive West, Bethlehem, Pennsylvania 18015	www.lehigh.edu	4-year, Private not-for-profit	Bachelor's degree;Master's degree;Post-master's certificate;Doctor's degree - research/scholarship	City: Small	Yes	7119	5062	87%	NA	Fall 2008	$27,848	-	213543	00328900
Neuroanatomy; Neurobiology and Anatomy; Neurobiology and Behavior; Neurobiology and Neurosciences, Other; Neuropharmacology; Neuroscience	Bachelors	Loras College	1450 Alta Vista, Dubuque, Iowa 52004-0178	www.loras.edu	4-year, Private not-for-profit	Associate's degree;Bachelor's degree;Master's degree	City: Small	Yes	1569	1490	64%	NA	Fall 2008	$20,018	-	153825	00187300
Neuroanatomy; Neurobiology and Anatomy; Neurobiology and Behavior; Neurobiology and Neurosciences, Other; Neuropharmacology; Neuroscience	Bachelors	Macalester College	1600 Grand Ave, Saint Paul, Minnesota 55105-1899	www.macalester.edu	4-year, Private not-for-profit	Bachelor's degree	City: Large	Yes	2073	2073	90%	NA	Fall 2008	$27,999	-	173902	00235800
Neuroanatomy; Neurobiology and Anatomy; Neurobiology and Behavior; Neurobiology and Neurosciences, Other; Neuropharmacology; Neuroscience	Bachelors	Maryville College	502 E Lamar Alexander Pky, Maryville, Tennessee 37804-5907	www.maryvillecollege.edu	4-year, Private not-for-profit	Bachelor's degree	Suburb: Large	Yes	1213	1213	54%	NA	Fall 2008	$16,504	-	220710	00350500
Neuroanatomy; Neurobiology and Anatomy; Neurobiology and Behavior; Neurobiology and Neurosciences, Other; Neuropharmacology; Neuroscience	Bachelors	Massachusetts Institute of Technology	77 Massachusetts Avenue, Cambridge, Massachusetts 02139-4307	web.mit.edu/student/	4-year, Private not-for-profit	Bachelor's degree;Master's degree;Doctor's degree - research/scholarship	City: Midsize	Yes	11319	4512	91%	NA	Fall 2008	$22,212	-	166683	00217800
Neuroanatomy; Neurobiology and Anatomy; Neurobiology and Behavior; Neurobiology and Neurosciences, Other; Neuropharmacology; Neuroscience	Bachelors	Michigan State University	East Lansing, Michigan 48824-1046	www.msu.edu	4-year, Public	One but less than two years certificate;Bachelor's degree;Master's degree;Post-master's certificate;Doctor's degree - research/scholarship;Doctor's degree - professional practice	City: Small	Yes	50081	38786	79%	13%	Fall 2008	$14,791	-	171100	00229000
Neuroanatomy; Neurobiology and Anatomy; Neurobiology and Behavior; Neurobiology and Neurosciences, Other; Neuropharmacology; Neuroscience	Bachelors	Middlebury College	Old Chapel, Middlebury, Vermont 05753	www.middlebury.edu	4-year, Private not-for-profit	Bachelor's degree;Master's degree;Doctor's degree - research/scholarship	Town: Distant	Yes	2533	2526	94%	3%	Fall 2008	$20,903	-	230959	00369100
Neuroanatomy; Neurobiology and Anatomy; Neurobiology and Behavior; Neurobiology and Neurosciences, Other; Neuropharmacology; Neuroscience	Bachelors	Millsaps College	1701 N State St, Jackson, Mississippi 39210-0001	www.millsaps.edu	4-year, Private not-for-profit	Bachelor's degree;Master's degree	City: Midsize	Yes	842	768	64%	NA	Fall 2008	$21,661	-	175980	00241400
Neuroanatomy; Neurobiology and Anatomy; Neurobiology and Behavior; Neurobiology and Neurosciences, Other; Neuropharmacology; Neuroscience	Bachelors	Moravian College	1200 Main St, Bethlehem, Pennsylvania 18018-6650	www.moravian.edu	4-year, Private not-for-profit	Bachelor's degree;Postbaccalaureate certificate;Master's degree	City: Small	Yes	1970	1612	69%	26%	Fall 2008	$26,258	-	214157	00330100
Neuroanatomy; Neurobiology and Anatomy; Neurobiology and Behavior; Neurobiology and Neurosciences, Other; Neuropharmacology; Neuroscience	Bachelors	Morehead State University	University Blvd, Morehead, Kentucky 40351	www.moreheadstate.edu	4-year, Public	Associate's degree;Bachelor's degree;Postbaccalaureate certificate;Master's degree;Post-master's certificate;Doctor's degree	Town: Remote	Yes	11052	9951	43%	NA	Fall 2008	$11,373	-	157386	00197600
Neuroanatomy; Neurobiology and Anatomy; Neurobiology and Behavior; Neurobiology and Neurosciences, Other; Neuropharmacology; Neuroscience	Bachelors	Mount Holyoke College	50 College Street, South Hadley, Massachusetts 01075-1489	www.mtholyoke.edu	4-year, Private not-for-profit	Bachelor's degree;Postbaccalaureate certificate;Master's degree	Suburb: Large	Yes	2255	2189	80%	16%	Fall 2008	$27,398	-	166939	00219200
Neuroanatomy; Neurobiology and Anatomy; Neurobiology and Behavior; Neurobiology and Neurosciences, Other; Neuropharmacology; Neuroscience	Bachelors	Mount Saint Joseph University	5701 Delhi Rd, Cincinnati, Ohio 45233-1670	www.msj.edu	4-year, Private not-for-profit	Less than one year certificate;One but less than two years certificate;Associate's degree;Two but less than 4 years certificate;Bachelor's degree;Postbaccalaureate certificate;Master's degree;Doctor's degree	Suburb: Large	Yes	2219	1657	53%	NA	Fall 2008	$17,469	-	204200	00303300
Neuroanatomy; Neurobiology and Anatomy; Neurobiology and Behavior; Neurobiology and Neurosciences, Other; Neuropharmacology; Neuroscience	Bachelors	Muhlenberg College	2400 Chew Street, Allentown, Pennsylvania 18104	www.muhlenberg.edu	4-year, Private not-for-profit	Less than one year certificate;One but less than two years certificate;Associate's degree;Two but less than 4 years certificate;Bachelor's degree	City: Midsize	Yes	2440	2440	86%	NA	Fall 2008	$35,610	-	214175	00330400
Neuroanatomy; Neurobiology and Anatomy; Neurobiology and Behavior; Neurobiology and Neurosciences, Other; Neuropharmacology; Neuroscience	Bachelors	Muskingum University	163 Stormont Street, New Concord, Ohio 43762	www.muskingum.edu/	4-year, Private not-for-profit	Bachelor's degree;Master's degree	Town: Distant	Yes	2074	1724	53%	NA	Fall 2008	$19,014	-	204264	00308400
Neuroanatomy; Neurobiology and Anatomy; Neurobiology and Behavior; Neurobiology and Neurosciences, Other; Neuropharmacology; Neuroscience	Bachelors	New York University	70 Washington Sq South, New York, New York 10012-1091	www.nyu.edu	4-year, Private not-for-profit	Less than one year certificate;One but less than two years certificate;Associate's degree;Bachelor's degree;Postbaccalaureate certificate;Master's degree;Post-master's certificate;Doctor's degree - research/scholarship;Doctor's degree - professional practice;Doctor's degree - other	City: Large	Yes	49274	24985	83%	NA	Fall 2008	$35,543	-	193900	00278500
Neuroanatomy; Neurobiology and Anatomy; Neurobiology and Behavior; Neurobiology and Neurosciences, Other; Neuropharmacology; Neuroscience	Bachelors	Northeastern University	360 Huntington Ave, Boston, Massachusetts 02115-5005	www.northeastern.edu	4-year, Private not-for-profit	Bachelor's degree;Master's degree;Post-master's certificate;Doctor's degree - research/scholarship;Doctor's degree - professional practice;Doctor's degree - other	City: Large	Yes	19798	13510	82%	NA	Fall 2008	$30,546	-	167358	00219900
Neuroanatomy; Neurobiology and Anatomy; Neurobiology and Behavior; Neurobiology and Neurosciences, Other; Neuropharmacology; Neuroscience	Bachelors	Northwestern University	633 Clark St, Evanston, Illinois 60208	www.northwestern.edu	4-year, Private not-for-profit	One but less than two years certificate;Bachelor's degree;Postbaccalaureate certificate;Master's degree;Post-master's certificate;Doctor's degree - research/scholarship;Doctor's degree - professional practice	City: Small	Yes	21554	9048	93%	NA	Fall 2008	$28,667	-	147767	00173900
Neuroanatomy; Neurobiology and Anatomy; Neurobiology and Behavior; Neurobiology and Neurosciences, Other; Neuropharmacology; Neuroscience	Bachelors	Oberlin College	70 N Professor St, Oberlin, Ohio 44074	www.oberlin.edu	4-year, Private not-for-profit	Two but less than 4 years certificate;Bachelor's degree;Postbaccalaureate certificate;Master's degree	Town: Fringe	Yes	2978	2961	88%	NA	Fall 2008	$38,887	-	204501	00308600
Neuroanatomy; Neurobiology and Anatomy; Neurobiology and Behavior; Neurobiology and Neurosciences, Other; Neuropharmacology; Neuroscience	Bachelors	Ohio State University-Main Campus	190 N. Oval Mall, Columbus, Ohio 43210	www.osu.edu/	4-year, Public	One but less than two years certificate;Associate's degree;Bachelor's degree;Postbaccalaureate certificate;Master's degree;Post-master's certificate;Doctor's degree - research/scholarship;Doctor's degree - professional practice	City: Large	Yes	58322	44741	83%	10%	Fall 2008	$18,215	-	204796	00309000
Neuroanatomy; Neurobiology and Anatomy; Neurobiology and Behavior; Neurobiology and Neurosciences, Other; Neuropharmacology; Neuroscience	Bachelors	Ohio University-Main Campus	020 Chubb Hall, Athens, Ohio 45701-2979	www.ohio.edu	4-year, Public	Less than one year certificate;Associate's degree;Bachelor's degree;Postbaccalaureate certificate;Master's degree;Doctor's degree - research/scholarship;Doctor's degree - professional practice	Town: Distant	Yes	29217	23571	67%	25%	Fall 2008	$19,613	-	204857	00310000
Neuroanatomy; Neurobiology and Anatomy; Neurobiology and Behavior; Neurobiology and Neurosciences, Other; Neuropharmacology; Neuroscience	Bachelors	Ohio Wesleyan University	61 S Sandusky Street, Delaware, Ohio 43015-2370	www.owu.edu/	4-year, Private not-for-profit	Bachelor's degree	Suburb: Large	Yes	1734	1734	66%	NA	Fall 2008	$29,445	-	204909	00310900
Neuroanatomy; Neurobiology and Anatomy; Neurobiology and Behavior; Neurobiology and Neurosciences, Other; Neuropharmacology; Neuroscience	Bachelors	Pitzer College	1050 North Mills Avenue, Claremont, California 91711-6101	www.pitzer.edu	4-year, Private not-for-profit	Bachelor's degree	Suburb: Large	Yes	1076	1076	84%	NA	Fall 2008	$26,082	-	121257	00117200
Neuroanatomy; Neurobiology and Anatomy; Neurobiology and Behavior; Neurobiology and Neurosciences, Other; Neuropharmacology; Neuroscience	Bachelors	Pomona College	550 N College Ave, Claremont, California 91711-6319	www.pomona.edu	4-year, Private not-for-profit	Bachelor's degree	Suburb: Large	Yes	1650	1650	93%	NA	Fall 2008	$19,205	-	121345	00117300
Neuroanatomy; Neurobiology and Anatomy; Neurobiology and Behavior; Neurobiology and Neurosciences, Other; Neuropharmacology; Neuroscience	Bachelors	Purdue University-Main Campus	Hovde Hall of Administration, West Lafayette, Indiana 47907-2040	www.purdue.edu	4-year, Public	Less than one year certificate;Associate's degree;Bachelor's degree;Postbaccalaureate certificate;Master's degree;Post-master's certificate;Doctor's degree - research/scholarship;Doctor's degree - professional practice	Suburb: Midsize	Yes	39752	30237	73%	NA	Fall 2008	$13,081	-	243780	00182500
Neuroanatomy; Neurobiology and Anatomy; Neurobiology and Behavior; Neurobiology and Neurosciences, Other; Neuropharmacology; Neuroscience	Bachelors	Randolph-Macon College	204 Henry St, Ashland, Virginia 23005-5505	www.rmc.edu	4-year, Private not-for-profit	Bachelor's degree	Suburb: Large	Yes	1394	1394	62%	8%	Fall 2008	$26,056	-	233295	00373300
Neuroanatomy; Neurobiology and Anatomy; Neurobiology and Behavior; Neurobiology and Neurosciences, Other; Neuropharmacology; Neuroscience	Bachelors	Regis University	3333 Regis Blvd, Denver, Colorado 80221-1099	www.regis.edu/	4-year, Private not-for-profit	Less than one year certificate;One but less than two years certificate;Bachelor's degree;Postbaccalaureate certificate;Master's degree;Post-master's certificate;Doctor's degree - professional practice	City: Large	Yes	9208	5009	59%	NA	Fall 2008	$26,226	-	127918	00136300
Neuroanatomy; Neurobiology and Anatomy; Neurobiology and Behavior; Neurobiology and Neurosciences, Other; Neuropharmacology; Neuroscience	Bachelors	Rhodes College	2000 North Parkway, Memphis, Tennessee 38112-1690	www.rhodes.edu	4-year, Private not-for-profit	Bachelor's degree;Master's degree	City: Large	Yes	2054	2031	80%	19%	Fall 2008	$28,615	-	221351	00351900
Neuroanatomy; Neurobiology and Anatomy; Neurobiology and Behavior; Neurobiology and Neurosciences, Other; Neuropharmacology; Neuroscience	Bachelors	Saint Ambrose University	518 W Locust St, Davenport, Iowa 52803-2898	www.sau.edu	4-year, Private not-for-profit	Less than one year certificate;One but less than two years certificate;Bachelor's degree;Master's degree;Post-master's certificate;Doctor's degree - research/scholarship;Doctor's degree - professional practice	City: Small	Yes	3508	2714	57%	32%	Fall 2008	$24,409	-	154235	00188900
Neuroanatomy; Neurobiology and Anatomy; Neurobiology and Behavior; Neurobiology and Neurosciences, Other; Neuropharmacology; Neuroscience	Bachelors	Saint Louis University	One North Grand Blvd, Saint Louis, Missouri 63103-2097	www.slu.edu	4-year, Private not-for-profit	Less than one year certificate;One but less than two years certificate;Associate's degree;Bachelor's degree;Postbaccalaureate certificate;Master's degree;Post-master's certificate;Doctor's degree - research/scholarship;Doctor's degree - professional practice	City: Large	Yes	17052	12374	72%	NA	Fall 2008	$33,812	-	179159	00250600
Neuroanatomy; Neurobiology and Anatomy; Neurobiology and Behavior; Neurobiology and Neurosciences, Other; Neuropharmacology; Neuroscience	Bachelors	Scripps College	1030 North Columbia Avenue, Claremont, California 91711-3905	www.scrippscollege.edu	4-year, Private not-for-profit	Bachelor's degree;Postbaccalaureate certificate	Suburb: Large	Yes	988	972	87%	NA	Fall 2008	$35,037	-	123165	00117400
Neuroanatomy; Neurobiology and Anatomy; Neurobiology and Behavior; Neurobiology and Neurosciences, Other; Neuropharmacology; Neuroscience	Bachelors	Simmons College	300 The Fenway, Boston, Massachusetts 02115-5898	www.simmons.edu	4-year, Private not-for-profit	Bachelor's degree;Postbaccalaureate certificate;Master's degree;Post-master's certificate;Doctor's degree - research/scholarship;Doctor's degree - professional practice	City: Large	Yes	4802	1622	67%	14%	Fall 2008	$28,840	-	167783	00220800
Neuroanatomy; Neurobiology and Anatomy; Neurobiology and Behavior; Neurobiology and Neurosciences, Other; Neuropharmacology; Neuroscience	Bachelors	Skidmore College	815 N Broadway, Saratoga Springs, New York 12866	www.skidmore.edu/	4-year, Private not-for-profit	Bachelor's degree;Master's degree	Suburb: Small	Yes	2646	2632	87%	NA	Fall 2008	$24,316	-	195526	00281400
Neuroanatomy; Neurobiology and Anatomy; Neurobiology and Behavior; Neurobiology and Neurosciences, Other; Neuropharmacology; Neuroscience	Bachelors	Smith College	Elm St, Northampton, Massachusetts 01063	www.smith.edu	4-year, Private not-for-profit	Bachelor's degree;Postbaccalaureate certificate;Master's degree;Post-master's certificate;Doctor's degree - research/scholarship	Suburb: Large	Yes	2989	2563	87%	NA	Fall 2008	$25,619	-	167835	00220900
Neuroanatomy; Neurobiology and Anatomy; Neurobiology and Behavior; Neurobiology and Neurosciences, Other; Neuropharmacology; Neuroscience	Bachelors	St Catherine University	2004 Randolph Ave, Saint Paul, Minnesota 55105	www.stkate.edu	4-year, Private not-for-profit	Less than one year certificate;One but less than two years certificate;Associate's degree;Bachelor's degree;Postbaccalaureate certificate;Master's degree;Doctor's degree - professional practice	City: Large	Yes	5055	3491	59%	36%	Fall 2008	$22,146	-	175005	00234200
Neuroanatomy; Neurobiology and Anatomy; Neurobiology and Behavior; Neurobiology and Neurosciences, Other; Neuropharmacology; Neuroscience	Bachelors	St Lawrence University	23 Romoda Drive, Canton, New York 13617	www.stlawu.edu	4-year, Private not-for-profit	Bachelor's degree;Master's degree;Post-master's certificate	Town: Remote	Yes	2419	2317	85%	12%	Fall 2008	$30,938	-	195216	00282900
Neuroanatomy; Neurobiology and Anatomy; Neurobiology and Behavior; Neurobiology and Neurosciences, Other; Neuropharmacology; Neuroscience	Bachelors	Stonehill College	320 Washington Street, Easton, Massachusetts 02357-6110	www.stonehill.edu	4-year, Private not-for-profit	Bachelor's degree	Suburb: Large	Yes	2284	2284	82%	NA	Fall 2008	$31,085	-	167996	00221700
Neuroanatomy; Neurobiology and Anatomy; Neurobiology and Behavior; Neurobiology and Neurosciences, Other; Neuropharmacology; Neuroscience	Bachelors	Susquehanna University	514 University Ave, Selinsgrove, Pennsylvania 17870-1025	www.susqu.edu	4-year, Private not-for-profit	Bachelor's degree	Town: Distant	Yes	2093	2093	76%	NA	Fall 2008	$26,531	-	216278	00336900
Neuroanatomy; Neurobiology and Anatomy; Neurobiology and Behavior; Neurobiology and Neurosciences, Other; Neuropharmacology; Neuroscience	Bachelors	Swarthmore College	500 College Ave, Swarthmore, Pennsylvania 19081	www.swarthmore.edu	4-year, Private not-for-profit	Bachelor's degree	Suburb: Large	Yes	1542	1542	94%	NA	Fall 2008	$22,557	-	216287	00337000
Neuroanatomy; Neurobiology and Anatomy; Neurobiology and Behavior; Neurobiology and Neurosciences, Other; Neuropharmacology; Neuroscience	Bachelors	Syracuse University	900 South Crouse Ave., Syracuse, New York 13244	syr.edu/	4-year, Private not-for-profit	Less than one year certificate;Associate's degree;Bachelor's degree;Postbaccalaureate certificate;Master's degree;Post-master's certificate;Doctor's degree - research/scholarship;Doctor's degree - professional practice	City: Midsize	Yes	21492	15224	80%	NA	Fall 2008	$29,621	-	196413	00288200
Neuroanatomy; Neurobiology and Anatomy; Neurobiology and Behavior; Neurobiology and Neurosciences, Other; Neuropharmacology; Neuroscience	Bachelors	Temple University	1801 North Broad Street, Philadelphia, Pennsylvania 19122-6096	www.temple.edu	4-year, Public	Less than one year certificate;One but less than two years certificate;Associate's degree;Two but less than 4 years certificate;Bachelor's degree;Postbaccalaureate certificate;Master's degree;Post-master's certificate;Doctor's degree - research/scholarship;Doctor's degree - professional practice	City: Large	Yes	37485	28287	69%	20%	Fall 2008	$19,435	-	216339	00337100
Neuroanatomy; Neurobiology and Anatomy; Neurobiology and Behavior; Neurobiology and Neurosciences, Other; Neuropharmacology; Neuroscience	Bachelors	Texas Christian University	2800 S University Dr, Fort Worth, Texas 76129	www.tcu.edu/	4-year, Private not-for-profit	One but less than two years certificate;Two but less than 4 years certificate;Bachelor's degree;Postbaccalaureate certificate;Master's degree;Post-master's certificate;Doctor's degree - research/scholarship;Doctor's degree - professional practice	City: Large	Yes	10033	8647	75%	18%	Fall 2008	$31,087	-	228875	00363600
Neuroanatomy; Neurobiology and Anatomy; Neurobiology and Behavior; Neurobiology and Neurosciences, Other; Neuropharmacology; Neuroscience	Bachelors	The College of Wooster	1189 Beall Avenue, Wooster, Ohio 44691	www.wooster.edu	4-year, Private not-for-profit	Bachelor's degree	Town: Distant	Yes	2049	2049	76%	10%	Fall 2008	$28,016	-	206589	00303700
Neuroanatomy; Neurobiology and Anatomy; Neurobiology and Behavior; Neurobiology and Neurosciences, Other; Neuropharmacology; Neuroscience	Bachelors	The University of Texas at Austin	110 Inner Campus Drive, Austin, Texas 78712	www.utexas.edu	4-year, Public	Less than one year certificate;Bachelor's degree;Postbaccalaureate certificate;Master's degree;Doctor's degree - research/scholarship;Doctor's degree - professional practice	City: Large	Yes	51313	39523	81%	NA	Fall 2008	$16,832	-	228778	00365800
Neuroanatomy; Neurobiology and Anatomy; Neurobiology and Behavior; Neurobiology and Neurosciences, Other; Neuropharmacology; Neuroscience	Bachelors	The University of Texas at Dallas	800 West Campbell Road, Richardson, Texas 75080-3021	www.utdallas.edu	4-year, Public	Bachelor's degree;Postbaccalaureate certificate;Master's degree;Doctor's degree - research/scholarship;Doctor's degree - professional practice	City: Small	Yes	23095	14300	71%	16%	Fall 2008	$9,098	-	228787	00974100
Neuroanatomy; Neurobiology and Anatomy; Neurobiology and Behavior; Neurobiology and Neurosciences, Other; Neuropharmacology; Neuroscience	Bachelors	Thiel College	75 College Ave, Greenville, Pennsylvania 16125-2181	www.thiel.edu	4-year, Private not-for-profit	Associate's degree;Bachelor's degree	Town: Fringe	Yes	1074	1074	36%	NA	Fall 2008	$22,664	-	216357	00337600
Neuroanatomy; Neurobiology and Anatomy; Neurobiology and Behavior; Neurobiology and Neurosciences, Other; Neuropharmacology; Neuroscience	Bachelors	Transylvania University	300 N Broadway, Lexington, Kentucky 40508-1797	www.transy.edu	4-year, Private not-for-profit	Bachelor's degree	City: Large	Yes	1014	1014	70%	NA	Fall 2008	$23,093	-	157818	00198700
Neuroanatomy; Neurobiology and Anatomy; Neurobiology and Behavior; Neurobiology and Neurosciences, Other; Neuropharmacology; Neuroscience	Bachelors	Trinity College	300 Summit St, Hartford, Connecticut 06106-3100	www.Trincoll.edu	4-year, Private not-for-profit	Bachelor's degree;Master's degree	City: Midsize	Yes	2408	2316	84%	10%	Fall 2008	$25,120	-	130590	00141400
Neuroanatomy; Neurobiology and Anatomy; Neurobiology and Behavior; Neurobiology and Neurosciences, Other; Neuropharmacology; Neuroscience	Bachelors	Trinity University	One Trinity Place, San Antonio, Texas 78212-7200	www.trinity.edu	4-year, Private not-for-profit	Bachelor's degree;Master's degree	City: Large	Yes	2432	2241	81%	NA	Fall 2008	$27,851	-	229267	00364700
Neuroanatomy; Neurobiology and Anatomy; Neurobiology and Behavior; Neurobiology and Neurosciences, Other; Neuropharmacology; Neuroscience	Bachelors	Tulane University of Louisiana	6823 St. Charles Avenue, New Orleans, Louisiana 70118-5698	tulane.edu	4-year, Private not-for-profit	Associate's degree;Bachelor's degree;Postbaccalaureate certificate;Master's degree;Doctor's degree - research/scholarship;Doctor's degree - professional practice	City: Large	Yes	12603	7892	83%	13%	Fall 2008	$32,797	-	160755	00202900
Neuroanatomy; Neurobiology and Anatomy; Neurobiology and Behavior; Neurobiology and Neurosciences, Other; Neuropharmacology; Neuroscience	Bachelors	Union College	807 Union St, Schenectady, New York 12308-2311	www.union.edu/	4-year, Private not-for-profit	Bachelor's degree	City: Small	Yes	2242	2242	86%	NA	Fall 2008	$33,826	-	196866	00288900
Neuroanatomy; Neurobiology and Anatomy; Neurobiology and Behavior; Neurobiology and Neurosciences, Other; Neuropharmacology; Neuroscience	Bachelors	University of Alabama at Birmingham	Administration Bldg Suite 1070, Birmingham, Alabama 35294-0110	www.uab.edu	4-year, Public	One but less than two years certificate;Two but less than 4 years certificate;Bachelor's degree;Postbaccalaureate certificate;Master's degree;Post-master's certificate;Doctor's degree - research/scholarship;Doctor's degree - professional practice;Doctor's degree - other	City: Midsize	Yes	18698	11679	56%	24%	Fall 2008	$13,982	-	100663	00105200
Neuroanatomy; Neurobiology and Anatomy; Neurobiology and Behavior; Neurobiology and Neurosciences, Other; Neuropharmacology; Neuroscience	Bachelors	University of Arizona	1401 E University, Tucson, Arizona 85721-0066	www.arizona.edu	4-year, Public	Bachelor's degree;Postbaccalaureate certificate;Master's degree;Post-master's certificate;Doctor's degree - research/scholarship;Doctor's degree - professional practice	City: Large	Yes	42236	32987	60%	NA	Fall 2008	$15,681	-	104179	00108300
Neuroanatomy; Neurobiology and Anatomy; Neurobiology and Behavior; Neurobiology and Neurosciences, Other; Neuropharmacology; Neuroscience	Bachelors	University of California-Davis	One Shields Avenue, Davis, California 95616-8678	www.ucdavis.edu	4-year, Public	Bachelor's degree;Postbaccalaureate certificate;Master's degree;Post-master's certificate;Doctor's degree - research/scholarship;Doctor's degree - professional practice	Suburb: Small	Yes	34508	27565	83%	NA	Fall 2008	$16,231	-	110644	00131300
Neuroanatomy; Neurobiology and Anatomy; Neurobiology and Behavior; Neurobiology and Neurosciences, Other; Neuropharmacology; Neuroscience	Bachelors	University of California-Irvine	501 Aldrich Hall, Irvine, California 92697	www.uci.edu/	4-year, Public	Bachelor's degree;Postbaccalaureate certificate;Master's degree;Doctor's degree - research/scholarship;Doctor's degree - professional practice	City: Midsize	Yes	30051	24489	86%	9%	Fall 2008	$12,072	-	110653	00131400
Neuroanatomy; Neurobiology and Anatomy; Neurobiology and Behavior; Neurobiology and Neurosciences, Other; Neuropharmacology; Neuroscience	Bachelors	University of California-Los Angeles	405 Hilgard Ave, Los Angeles, California 90095-1405	www.ucla.edu/	4-year, Public	Bachelor's degree;Master's degree;Doctor's degree - research/scholarship;Doctor's degree - professional practice	City: Large	Yes	41845	29633	91%	NA	Fall 2008	$12,510	-	110662	00131500
Neuroanatomy; Neurobiology and Anatomy; Neurobiology and Behavior; Neurobiology and Neurosciences, Other; Neuropharmacology; Neuroscience	Bachelors	University of California-Riverside	900 University Ave, Riverside, California 92521	WWW.UCR.EDU	4-year, Public	Bachelor's degree;Master's degree;Doctor's degree - research/scholarship;Doctor's degree - professional practice	City: Large	Yes	21498	18790	69%	NA	Fall 2008	$13,110	-	110671	00131600
Neuroanatomy; Neurobiology and Anatomy; Neurobiology and Behavior; Neurobiology and Neurosciences, Other; Neuropharmacology; Neuroscience	Bachelors	University of California-San Diego	9500 Gilman Dr, La Jolla, California 92093	www.ucsd.edu	4-year, Public	Bachelor's degree;Master's degree;Doctor's degree - research/scholarship;Doctor's degree - professional practice	City: Large	Yes	30709	24810	86%	NA	Fall 2008	$13,693	-	110680	00131700
Neuroanatomy; Neurobiology and Anatomy; Neurobiology and Behavior; Neurobiology and Neurosciences, Other; Neuropharmacology; Neuroscience	Bachelors	University of California-Santa Cruz	1156 High St, Santa Cruz, California 95064-1011	www.ucsc.edu/	4-year, Public	Bachelor's degree;Postbaccalaureate certificate;Master's degree;Doctor's degree - research/scholarship	City: Small	Yes	17866	16277	77%	NA	Fall 2008	$14,759	-	110714	00132100
Neuroanatomy; Neurobiology and Anatomy; Neurobiology and Behavior; Neurobiology and Neurosciences, Other; Neuropharmacology; Neuroscience	Bachelors	University of Cincinnati-Main Campus	2624 Clifton Avenue, Cincinnati, Ohio 45221-0063	www.uc.edu	4-year, Public	Less than one year certificate;One but less than two years certificate;Associate's degree;Two but less than 4 years certificate;Bachelor's degree;Postbaccalaureate certificate;Master's degree;Post-master's certificate;Doctor's degree - research/scholarship;Doctor's degree - professional practice	City: Large	Yes	35313	24300	60%	23%	Fall 2008	$19,739	-	201885	00312500
Neuroanatomy; Neurobiology and Anatomy; Neurobiology and Behavior; Neurobiology and Neurosciences, Other; Neuropharmacology; Neuroscience	Bachelors	University of Colorado Boulder	Regent Drive at Broadway, Boulder, Colorado 80309-0017	www.colorado.edu	4-year, Public	Bachelor's degree;Postbaccalaureate certificate;Master's degree;Post-master's certificate;Doctor's degree - research/scholarship;Doctor's degree - professional practice	City: Small	Yes	32432	26557	70%	21%	Fall 2008	$21,053	-	126614	00137000
Neuroanatomy; Neurobiology and Anatomy; Neurobiology and Behavior; Neurobiology and Neurosciences, Other; Neuropharmacology; Neuroscience	Bachelors	University of Delaware	104 Hullihen Hall, Newark, Delaware 19716	www.udel.edu/	4-year, Public	Associate's degree;Bachelor's degree;Master's degree;Doctor's degree - research/scholarship;Doctor's degree - professional practice	Suburb: Large	Yes	22680	18951	79%	NA	Fall 2008	$15,407	-	130943	00143100
Neuroanatomy; Neurobiology and Anatomy; Neurobiology and Behavior; Neurobiology and Neurosciences, Other; Neuropharmacology; Neuroscience	Bachelors	University of Evansville	1800 Lincoln Avenue, Evansville, Indiana 47722	www.evansville.edu/	4-year, Private not-for-profit	Associate's degree;Bachelor's degree;Master's degree;Doctor's degree - professional practice	City: Midsize	Yes	2567	2420	64%	NA	Fall 2008	$21,164	-	150534	00179500
Neuroanatomy; Neurobiology and Anatomy; Neurobiology and Behavior; Neurobiology and Neurosciences, Other; Neuropharmacology; Neuroscience	Bachelors	University of Illinois at Chicago	601 S Morgan, Chicago, Illinois 60607	www.uic.edu/index.html/	4-year, Public	Bachelor's degree;Postbaccalaureate certificate;Master's degree;Post-master's certificate;Doctor's degree - research/scholarship;Doctor's degree - professional practice	City: Large	Yes	27969	16718	60%	NA	Fall 2008	$11,567	-	145600	00177600
Neuroanatomy; Neurobiology and Anatomy; Neurobiology and Behavior; Neurobiology and Neurosciences, Other; Neuropharmacology; Neuroscience	Bachelors	University of Miami	University of Miami, Coral Gables, Florida 33146	www.miami.edu/	4-year, Private not-for-profit	Less than one year certificate;One but less than two years certificate;Bachelor's degree;Postbaccalaureate certificate;Master's degree;Post-master's certificate;Doctor's degree - research/scholarship;Doctor's degree - professional practice	Suburb: Large	Yes	16674	11175	81%	NA	Fall 2008	$33,284	-	135726	00153600
Neuroanatomy; Neurobiology and Anatomy; Neurobiology and Behavior; Neurobiology and Neurosciences, Other; Neuropharmacology; Neuroscience	Bachelors	University of Michigan-Ann Arbor	503 Thompson Street, Ann Arbor, Michigan 48109	www.umich.edu	4-year, Public	Bachelor's degree;Postbaccalaureate certificate;Master's degree;Post-master's certificate;Doctor's degree - research/scholarship;Doctor's degree - professional practice	City: Midsize	Yes	43625	28395	91%	NA	Fall 2008	$15,850	-	170976	00232500
Neuroanatomy; Neurobiology and Anatomy; Neurobiology and Behavior; Neurobiology and Neurosciences, Other; Neuropharmacology; Neuroscience	Bachelors	University of Minnesota-Twin Cities	100 Church Street SE, Minneapolis, Minnesota 55455-0213	www1.umn.edu/twincities/index.php	4-year, Public	Less than one year certificate;One but less than two years certificate;Two but less than 4 years certificate;Bachelor's degree;Postbaccalaureate certificate;Master's degree;Doctor's degree - research/scholarship;Doctor's degree - professional practice	City: Large	Yes	51147	34351	78%	13%	Fall 2008	$15,589	-	174066	00396900
Neuroanatomy; Neurobiology and Anatomy; Neurobiology and Behavior; Neurobiology and Neurosciences, Other; Neuropharmacology; Neuroscience	Bachelors	University of Mount Union	1972 Clark Ave., Alliance, Ohio 44601-3993	www.mountunion.edu	4-year, Private not-for-profit	Bachelor's degree;Master's degree	Town: Fringe	Yes	2262	2174	63%	NA	Fall 2008	$24,465	-	204185	00308300
Neuroanatomy; Neurobiology and Anatomy; Neurobiology and Behavior; Neurobiology and Neurosciences, Other; Neuropharmacology; Neuroscience	Bachelors	University of Nebraska at Omaha	6001 Dodge St, Omaha, Nebraska 68182-0225	www.unomaha.edu	4-year, Public	Bachelor's degree;Postbaccalaureate certificate;Master's degree;Post-master's certificate;Doctor's degree - research/scholarship	City: Large	Yes	15227	12221	45%	31%	Fall 2008	$10,979	-	181394	00255400
Neuroanatomy; Neurobiology and Anatomy; Neurobiology and Behavior; Neurobiology and Neurosciences, Other; Neuropharmacology; Neuroscience	Bachelors	University of Nevada-Reno	North Virginia Street, Reno, Nevada 89557	www.unr.edu/	4-year, Public	Bachelor's degree;Postbaccalaureate certificate;Master's degree;Post-master's certificate;Doctor's degree - research/scholarship;Doctor's degree - professional practice	City: Midsize	Yes	19934	16839	55%	NA	Fall 2008	$15,583	-	182290	00256800
Neuroanatomy; Neurobiology and Anatomy; Neurobiology and Behavior; Neurobiology and Neurosciences, Other; Neuropharmacology; Neuroscience	Bachelors	University of New England	11 Hills Beach Rd, Biddeford, Maine 04005-9599	www.une.edu/	4-year, Private not-for-profit	Bachelor's degree;Postbaccalaureate certificate;Master's degree;Post-master's certificate;Doctor's degree - research/scholarship;Doctor's degree - professional practice	Suburb: Midsize	Yes	6429	2749	57%	NA	Fall 2008	$32,238	-	161457	00205000
Neuroanatomy; Neurobiology and Anatomy; Neurobiology and Behavior; Neurobiology and Neurosciences, Other; Neuropharmacology; Neuroscience	Bachelors	University of New Hampshire-Main Campus	105 Main St., Thompson Hall, Durham, New Hampshire 03824-3547	www.unh.edu	4-year, Public	Associate's degree;Bachelor's degree;Postbaccalaureate certificate;Master's degree;Post-master's certificate;Doctor's degree - research/scholarship;Doctor's degree - professional practice	Suburb: Small	Yes	15117	12831	76%	NA	Fall 2008	$20,546	-	183044	00258900
Neuroanatomy; Neurobiology and Anatomy; Neurobiology and Behavior; Neurobiology and Neurosciences, Other; Neuropharmacology; Neuroscience	Bachelors	University of Pennsylvania	34th & Spruce Street, Philadelphia, Pennsylvania 19104-6303	www.upenn.edu	4-year, Private not-for-profit	Less than one year certificate;One but less than two years certificate;Associate's degree;Two but less than 4 years certificate;Bachelor's degree;Postbaccalaureate certificate;Master's degree;Post-master's certificate;Doctor's degree - research/scholarship;Doctor's degree - professional practice;Doctor's degree - other	City: Large	Yes	24806	11548	96%	NA	Fall 2008	$22,694	-	215062	00337800
Neuroanatomy; Neurobiology and Anatomy; Neurobiology and Behavior; Neurobiology and Neurosciences, Other; Neuropharmacology; Neuroscience	Bachelors	University of Pittsburgh-Pittsburgh Campus	4200 Fifth Avenue, Pittsburgh, Pennsylvania 15260	www.pitt.edu	4-year, Public	Less than one year certificate;Two but less than 4 years certificate;Bachelor's degree;Postbaccalaureate certificate;Master's degree;Post-master's certificate;Doctor's degree - research/scholarship;Doctor's degree - professional practice	City: Large	Yes	28617	18757	82%	NA	Fall 2008	$23,489	-	215293	00337900
Neuroanatomy; Neurobiology and Anatomy; Neurobiology and Behavior; Neurobiology and Neurosciences, Other; Neuropharmacology; Neuroscience	Bachelors	University of Rochester	Wilson Blvd. - Wallis Hall, Rochester, New York 14627-0011	www.rochester.edu	4-year, Private not-for-profit	Bachelor's degree;Postbaccalaureate certificate;Master's degree;Post-master's certificate;Doctor's degree - research/scholarship;Doctor's degree - professional practice	City: Midsize	Yes	11060	6266	84%	NA	Fall 2008	$32,996	-	195030	00289400
Neuroanatomy; Neurobiology and Anatomy; Neurobiology and Behavior; Neurobiology and Neurosciences, Other; Neuropharmacology; Neuroscience	Bachelors	University of San Diego	5998 Alcala Park, San Diego, California 92110-2492	www.sandiego.edu	4-year, Private not-for-profit	Bachelor's degree;Postbaccalaureate certificate;Master's degree;Doctor's degree - research/scholarship;Doctor's degree - professional practice	City: Large	Yes	8349	5741	77%	NA	Fall 2008	$32,482	-	122436	01039500
Neuroanatomy; Neurobiology and Anatomy; Neurobiology and Behavior; Neurobiology and Neurosciences, Other; Neuropharmacology; Neuroscience	Bachelors	University of Scranton	800 Linden Street, Scranton, Pennsylvania 18510-4629	www.scranton.edu	4-year, Private not-for-profit	One but less than two years certificate;Associate's degree;Bachelor's degree;Postbaccalaureate certificate;Master's degree;Post-master's certificate;Doctor's degree - professional practice	City: Small	Yes	5589	3998	80%	NA	Fall 2008	$33,353	-	215929	00338400
Neuroanatomy; Neurobiology and Anatomy; Neurobiology and Behavior; Neurobiology and Neurosciences, Other; Neuropharmacology; Neuroscience	Bachelors	University of Southern California	University Park, Los Angeles, California 90089	www.usc.edu/	4-year, Private not-for-profit	Bachelor's degree;Postbaccalaureate certificate;Master's degree;Post-master's certificate;Doctor's degree - research/scholarship;Doctor's degree - professional practice;Doctor's degree - other	City: Large	Yes	42453	18739	91%	NA	Fall 2008	$31,189	-	123961	00132800
Neuroanatomy; Neurobiology and Anatomy; Neurobiology and Behavior; Neurobiology and Neurosciences, Other; Neuropharmacology; Neuroscience	Bachelors	University of St Thomas	2115 Summit Ave, Saint Paul, Minnesota 55105-1078	www.stthomas.edu	4-year, Private not-for-profit	Two but less than 4 years certificate;Bachelor's degree;Postbaccalaureate certificate;Master's degree;Post-master's certificate;Doctor's degree - research/scholarship;Doctor's degree - professional practice	City: Large	Yes	10140	6148	72%	21%	Fall 2008	$30,606	-	174914	00234500
Neuroanatomy; Neurobiology and Anatomy; Neurobiology and Behavior; Neurobiology and Neurosciences, Other; Neuropharmacology; Neuroscience	Bachelors	University of Vermont	85 S Prospect St, Burlington, Vermont 05405-0160	www.uvm.edu	4-year, Public	Bachelor's degree;Postbaccalaureate certificate;Master's degree;Post-master's certificate;Doctor's degree - research/scholarship;Doctor's degree - professional practice	City: Small	Yes	12856	10992	76%	NA	Fall 2008	$17,075	-	231174	00369600
Neuroanatomy; Neurobiology and Anatomy; Neurobiology and Behavior; Neurobiology and Neurosciences, Other; Neuropharmacology; Neuroscience	Bachelors	University of Washington-Seattle Campus	1400 NE Campus Parkway, Seattle, Washington 98195-4550	www.washington.edu	4-year, Public	Bachelor's degree;Master's degree;Post-master's certificate;Doctor's degree - research/scholarship;Doctor's degree - professional practice	City: Large	Yes	44784	30672	84%	NA	Fall 2008	$10,374	-	236948	00379800
Neuroanatomy; Neurobiology and Anatomy; Neurobiology and Behavior; Neurobiology and Neurosciences, Other; Neuropharmacology; Neuroscience	Bachelors	Ursinus College	601 E. Main St, Collegeville, Pennsylvania 19426-1000	www.ursinus.edu	4-year, Private not-for-profit	Bachelor's degree	Suburb: Large	Yes	1681	1681	80%	NA	Fall 2008	$31,490	-	216524	00338500
Neuroanatomy; Neurobiology and Anatomy; Neurobiology and Behavior; Neurobiology and Neurosciences, Other; Neuropharmacology; Neuroscience	Bachelors	Vanderbilt University	2101 West End Avenue, Nashville, Tennessee 37240	www.vanderbilt.edu	4-year, Private not-for-profit	Bachelor's degree;Master's degree;Doctor's degree - research/scholarship;Doctor's degree - professional practice	City: Large	Yes	12686	6851	93%	NA	Fall 2008	$22,173	-	221999	00353500
Neuroanatomy; Neurobiology and Anatomy; Neurobiology and Behavior; Neurobiology and Neurosciences, Other; Neuropharmacology; Neuroscience	Bachelors	Vassar College	124 Raymond Ave, Poughkeepsie, New York 12604	www.vassar.edu	4-year, Private not-for-profit	Bachelor's degree;Master's degree	Suburb: Large	Yes	2421	2421	92%	NA	Fall 2008	$19,661	-	197133	00289500
Neuroanatomy; Neurobiology and Anatomy; Neurobiology and Behavior; Neurobiology and Neurosciences, Other; Neuropharmacology; Neuroscience	Bachelors	Wartburg College	100 Wartburg Blvd., Waverly, Iowa 50677-0903	www.wartburg.edu	4-year, Private not-for-profit	Bachelor's degree	Town: Distant	Yes	1661	1661	71%	NA	Fall 2008	$22,619	-	154527	00189600
Neuroanatomy; Neurobiology and Anatomy; Neurobiology and Behavior; Neurobiology and Neurosciences, Other; Neuropharmacology; Neuroscience	Bachelors	Washington and Lee University	204 West Washington Street, Lexington, Virginia 24450-2116	www.wlu.edu/	4-year, Private not-for-profit	Bachelor's degree;Master's degree;Doctor's degree - professional practice	Town: Distant	Yes	2264	1890	88%	10%	Fall 2008	$20,700	-	234207	00376800
Neuroanatomy; Neurobiology and Anatomy; Neurobiology and Behavior; Neurobiology and Neurosciences, Other; Neuropharmacology; Neuroscience	Bachelors	Washington State University	French Administration Building, Pullman, Washington 99164-5910	wsu.edu/	4-year, Public	Less than one year certificate;Bachelor's degree;Postbaccalaureate certificate;Master's degree;Post-master's certificate;Doctor's degree - research/scholarship;Doctor's degree - professional practice	Town: Distant	Yes	28686	23867	67%	NA	Fall 2008	$16,427	-	236939	00380000
Neuroanatomy; Neurobiology and Anatomy; Neurobiology and Behavior; Neurobiology and Neurosciences, Other; Neuropharmacology; Neuroscience	Bachelors	Washington University in St Louis	One Brookings Drive, Saint Louis, Missouri 63130-4899	www.wustl.edu	4-year, Private not-for-profit	One but less than two years certificate;Associate's degree;Bachelor's degree;Postbaccalaureate certificate;Master's degree;Post-master's certificate;Doctor's degree - research/scholarship;Doctor's degree - professional practice	Suburb: Large	Yes	14348	7401	95%	NA	Fall 2008	$33,374	-	179867	00252000
Neuroanatomy; Neurobiology and Anatomy; Neurobiology and Behavior; Neurobiology and Neurosciences, Other; Neuropharmacology; Neuroscience	Bachelors	Wellesley College	106 Central St, Wellesley, Massachusetts 02481-8203	www.wellesley.edu	4-year, Private not-for-profit	Bachelor's degree	Suburb: Large	Yes	2323	2323	91%	NA	Fall 2008	$21,216	-	168218	00222400
Neuroanatomy; Neurobiology and Anatomy; Neurobiology and Behavior; Neurobiology and Neurosciences, Other; Neuropharmacology; Neuroscience	Bachelors	Wesleyan College	4760 Forsyth Rd, Macon, Georgia 31210-4462	www.wesleyancollege.edu	4-year, Private not-for-profit	Bachelor's degree;Master's degree	City: Midsize	Yes	711	661	48%	NA	Fall 2008	$17,130	-	141325	00160000
Neuroanatomy; Neurobiology and Anatomy; Neurobiology and Behavior; Neurobiology and Neurosciences, Other; Neuropharmacology; Neuroscience	Bachelors	Western New England University	1215 Wilbraham Rd, Springfield, Massachusetts 01119-2684	www.wne.edu	4-year, Private not-for-profit	Less than one year certificate;Associate's degree;Bachelor's degree;Postbaccalaureate certificate;Master's degree;Doctor's degree - research/scholarship;Doctor's degree - professional practice	City: Midsize	Yes	3922	2732	59%	26%	Fall 2008	$28,644	-	168254	00222600
Neuroanatomy; Neurobiology and Anatomy; Neurobiology and Behavior; Neurobiology and Neurosciences, Other; Neuropharmacology; Neuroscience	Bachelors	Western Washington University	516 High Street, Bellingham, Washington 98225-9008	www.wwu.edu	4-year, Public	Less than one year certificate;Bachelor's degree;Postbaccalaureate certificate;Master's degree;Post-master's certificate	City: Small	Yes	15060	14152	72%	NA	Fall 2008	$15,184	-	237011	00380200
Neuroanatomy; Neurobiology and Anatomy; Neurobiology and Behavior; Neurobiology and Neurosciences, Other; Neuropharmacology; Neuroscience	Bachelors	Westminster College	1840 South 1300 East, Salt Lake City, Utah 84105	www.westminstercollege.edu	4-year, Private not-for-profit	Bachelor's degree;Postbaccalaureate certificate;Master's degree	City: Midsize	Yes	2991	2233	60%	NA	Fall 2008	$23,729	-	230807	00368100
Neuroanatomy; Neurobiology and Anatomy; Neurobiology and Behavior; Neurobiology and Neurosciences, Other; Neuropharmacology; Neuroscience	Bachelors	Westminster College	319 South Market Street, New Wilmington, Pennsylvania 16172	www.westminster.edu	4-year, Private not-for-profit	Bachelor's degree;Master's degree	Town: Fringe	Yes	1307	1159	76%	NA	Fall 2008	$21,635	-	216807	00339200
Neuroanatomy; Neurobiology and Anatomy; Neurobiology and Behavior; Neurobiology and Neurosciences, Other; Neuropharmacology; Neuroscience	Bachelors	Wheaton College	26 E Main St, Norton, Massachusetts 02766-2322	www.wheatoncollege.edu	4-year, Private not-for-profit	Bachelor's degree	Suburb: Large	Yes	1587	1587	77%	NA	Fall 2008	$34,145	-	168281	00222700
Neuroanatomy; Neurobiology and Anatomy; Neurobiology and Behavior; Neurobiology and Neurosciences, Other; Neuropharmacology; Neuroscience	Bachelors	Willamette University	900 State St, Salem, Oregon 97301	www.willamette.edu	4-year, Private not-for-profit	Bachelor's degree;Master's degree;Doctor's degree - professional practice	City: Midsize	Yes	2780	2166	77%	NA	Fall 2008	$30,672	-	210401	00322700
		* Cohort Year represents the year for which students began their studies and applies to Graduation and Transfer Out Rates.
		** Net Price is Average Net Price for 2013-2014 generated for full-time beginning undergraduate students who were awarded grant or scholarship aid from federal, state or local governments, or the institution. For public institutions only students paying the in-state or in-district rate are included. For institutions that charge students by program, net price is generated for the institution’s lar…
		NA (Not applicable) - Graduation rate, transfer-out rate and the net price are not applicable to institutions that do not have full-time, first-time degree-seeking undergraduate students in the applicable cohort year or the financial aid year.
		National Center for Education Statistics
		College Navigator
		Generated at:9/4/2015 11:40:32 AM from URL:http://nces.ed.gov/collegenavigator/default.aspx?s=all&p=26.1502+26.1503+26.1504+26.1599+26.1003+26.1501&l=92&xp=1
		Name	Address	Website	Type	Awards offered	Campus setting	Campus housing	Student population	Undergraduate students	Graduation Rate	Transfer-Out Rate	Cohort Year *	Net Price **	Largest Program	IPEDS ID	OPE ID
Neuroanatomy; Neurobiology and Anatomy; Neurobiology and Behavior; Neurobiology and Neurosciences, Other; Neuropharmacology; Neuroscience	Associates	Bucks County Community College	275 Swamp Rd, Newtown, Pennsylvania 18940-4106	www.bucks.edu/	2-year, Public	Less than one year certificate;One but less than two years certificate;Associate's degree	Rural: Fringe	No	8979	8979	12%	35%	Fall 2011	$7,589	-	211307	00323900
		* Cohort Year represents the year for which students began their studies and applies to Graduation and Transfer Out Rates.
		** Net Price is Average Net Price for 2013-2014 generated for full-time beginning undergraduate students who were awarded grant or scholarship aid from federal, state or local governments, or the institution. For public institutions only students paying the in-state or in-district rate are included. For institutions that charge students by program, net price is generated for the institution’s lar…
		NA (Not applicable) - Graduation rate, transfer-out rate and the net price are not applicable to institutions that do not have full-time, first-time degree-seeking undergraduate students in the applicable cohort year or the financial aid year.
		National Center for Education Statistics
		College Navigator
		Generated at:9/4/2015 11:41:35 AM from URL:http://nces.ed.gov/collegenavigator/default.aspx?s=all&p=26.1502+26.1503+26.1504+26.1599+26.1003+26.1501&l=94&xp=1
		Name	Address	Website	Type	Awards offered	Campus setting	Campus housing	Student population	Undergraduate students	Graduation Rate	Transfer-Out Rate	Cohort Year *	Net Price **	Largest Program	IPEDS ID	OPE ID
Neuroanatomy; Neurobiology and Anatomy; Neurobiology and Behavior; Neurobiology and Neurosciences, Other; Neuropharmacology; Neuroscience	Advanced	American University	4400 Massachusetts Ave NW, Washington, District of Columbia 20016-8001	WWW.AMERICAN.EDU	4-year, Private not-for-profit	Less than one year certificate;One but less than two years certificate;Associate's degree;Bachelor's degree;Postbaccalaureate certificate;Master's degree;Doctor's degree - research/scholarship;Doctor's degree - professional practice	City: Large	Yes	13061	7706	82%	NA	Fall 2008	$33,778	-	131159	00143400
Neuroanatomy; Neurobiology and Anatomy; Neurobiology and Behavior; Neurobiology and Neurosciences, Other; Neuropharmacology; Neuroscience	Advanced	Arizona State University-Tempe	University Drive and Mill Avenue, Tempe, Arizona 85287	www.asu.edu/	4-year, Public	Less than one year certificate;One but less than two years certificate;Bachelor's degree;Postbaccalaureate certificate;Master's degree;Doctor's degree - research/scholarship;Doctor's degree - professional practice	City: Midsize	Yes	50320	39961	63%	NA	Fall 2008	$12,191	-	104151	00108100
Neuroanatomy; Neurobiology and Anatomy; Neurobiology and Behavior; Neurobiology and Neurosciences, Other; Neuropharmacology; Neuroscience	Advanced	Baylor College of Medicine	One Baylor Plaza, Houston, Texas 77030-3498	www.bcm.edu	4-year, Private not-for-profit	Master's degree;Doctor's degree - research/scholarship;Doctor's degree - professional practice	City: Large	No	1584		NA	NA	Fall 2008	NA	-	223223	00494900
Neuroanatomy; Neurobiology and Anatomy; Neurobiology and Behavior; Neurobiology and Neurosciences, Other; Neuropharmacology; Neuroscience	Advanced	Boston University	One Silber Way, Boston, Massachusetts 02215	www.bu.edu	4-year, Private not-for-profit	Bachelor's degree;Postbaccalaureate certificate;Master's degree;Post-master's certificate;Doctor's degree - research/scholarship;Doctor's degree - professional practice	City: Large	Yes	32112	18017	85%	NA	Fall 2008	$32,539	-	164988	00213000
Neuroanatomy; Neurobiology and Anatomy; Neurobiology and Behavior; Neurobiology and Neurosciences, Other; Neuropharmacology; Neuroscience	Advanced	Brandeis University	415 South St, Waltham, Massachusetts 02454-9110	www.brandeis.edu/	4-year, Private not-for-profit	Bachelor's degree;Master's degree;Doctor's degree - research/scholarship	City: Small	Yes	5945	3729	91%	NA	Fall 2008	$26,367	-	165015	00213300
Neuroanatomy; Neurobiology and Anatomy; Neurobiology and Behavior; Neurobiology and Neurosciences, Other; Neuropharmacology; Neuroscience	Advanced	Brigham Young University-Provo	Main Campus, Provo, Utah 84602	www.byu.edu	4-year, Private not-for-profit	Bachelor's degree;Postbaccalaureate certificate;Master's degree;Post-master's certificate;Doctor's degree - research/scholarship;Doctor's degree - professional practice	City: Midsize	Yes	30484	27163	79%	NA	Fall 2008	$12,335	-	230038	00367000
Neuroanatomy; Neurobiology and Anatomy; Neurobiology and Behavior; Neurobiology and Neurosciences, Other; Neuropharmacology; Neuroscience	Advanced	Brown University	One Prospect Street, Providence, Rhode Island 02912	www.brown.edu	4-year, Private not-for-profit	Bachelor's degree;Master's degree;Doctor's degree - research/scholarship;Doctor's degree - professional practice	City: Midsize	Yes	9181	6548	96%	NA	Fall 2008	$21,193	-	217156	00340100
Neuroanatomy; Neurobiology and Anatomy; Neurobiology and Behavior; Neurobiology and Neurosciences, Other; Neuropharmacology; Neuroscience	Advanced	California Institute of Technology	1200 E California Blvd, Pasadena, California 91125	www.caltech.edu	4-year, Private not-for-profit	Bachelor's degree;Master's degree;Post-master's certificate;Doctor's degree - research/scholarship	City: Midsize	Yes	2209	983	92%	NA	Fall 2008	$26,910	-	110404	00113100
Neuroanatomy; Neurobiology and Anatomy; Neurobiology and Behavior; Neurobiology and Neurosciences, Other; Neuropharmacology; Neuroscience	Advanced	Carnegie Mellon University	5000 Forbes Avenue, Pittsburgh, Pennsylvania 15213-3890	www.cmu.edu/	4-year, Private not-for-profit	Bachelor's degree;Postbaccalaureate certificate;Master's degree;Post-master's certificate;Doctor's degree - research/scholarship	City: Large	Yes	12587	5888	88%	NA	Fall 2008	$33,670	-	211440	00324200
Neuroanatomy; Neurobiology and Anatomy; Neurobiology and Behavior; Neurobiology and Neurosciences, Other; Neuropharmacology; Neuroscience	Advanced	Case Western Reserve University	10900 Euclid Ave, Cleveland, Ohio 44106	www.case.edu	4-year, Private not-for-profit	Bachelor's degree;Postbaccalaureate certificate;Master's degree;Doctor's degree - research/scholarship;Doctor's degree - professional practice	City: Large	Yes	10771	4911	81%	NA	Fall 2008	$29,140	-	201645	00302400
Neuroanatomy; Neurobiology and Anatomy; Neurobiology and Behavior; Neurobiology and Neurosciences, Other; Neuropharmacology; Neuroscience	Advanced	Central Michigan University	106 Warriner Hall, Mount Pleasant, Michigan 48859	www.cmich.edu	4-year, Public	Bachelor's degree;Postbaccalaureate certificate;Master's degree;Post-master's certificate;Doctor's degree - research/scholarship;Doctor's degree - professional practice	Town: Distant	Yes	26879	20671	56%	NA	Fall 2008	$13,580	-	169248	00224300
Neuroanatomy; Neurobiology and Anatomy; Neurobiology and Behavior; Neurobiology and Neurosciences, Other; Neuropharmacology; Neuroscience	Advanced	College of Staten Island CUNY	2800 Victory Blvd, Staten Island, New York 10314	www.csi.cuny.edu	4-year, Public	Less than one year certificate;Associate's degree;Bachelor's degree;Postbaccalaureate certificate;Master's degree;Post-master's certificate;Doctor's degree - professional practice	City: Large	Yes	14346	13345	27%	32%	Fall 2008	$9,575	-	190558	00269800
Neuroanatomy; Neurobiology and Anatomy; Neurobiology and Behavior; Neurobiology and Neurosciences, Other; Neuropharmacology; Neuroscience	Advanced	Columbia University in the City of New York	West 116 St and Broadway, New York, New York 10027	www.columbia.edu	4-year, Private not-for-profit	Bachelor's degree;Postbaccalaureate certificate;Master's degree;Post-master's certificate;Doctor's degree - research/scholarship;Doctor's degree - professional practice	City: Large	Yes	27589	8100	95%	NA	Fall 2008	$20,838	-	190150	00270700
Neuroanatomy; Neurobiology and Anatomy; Neurobiology and Behavior; Neurobiology and Neurosciences, Other; Neuropharmacology; Neuroscience	Advanced	Cornell University	300 Day Hall, Ithaca, New York 14853	www.cornell.edu	4-year, Private not-for-profit	Bachelor's degree;Master's degree;Doctor's degree - research/scholarship;Doctor's degree - professional practice	City: Small	Yes	21679	14282	93%	NA	Fall 2008	$28,537	-	190415	00271100
Neuroanatomy; Neurobiology and Anatomy; Neurobiology and Behavior; Neurobiology and Neurosciences, Other; Neuropharmacology; Neuroscience	Advanced	CUNY Queens College	65-30 Kissena Blvd, Flushing, New York 11367	www.qc.cuny.edu	4-year, Public	Bachelor's degree;Postbaccalaureate certificate;Master's degree;Post-master's certificate	City: Large	Yes	19310	15773	57%	20%	Fall 2008	$6,728	-	190664	00269000
Neuroanatomy; Neurobiology and Anatomy; Neurobiology and Behavior; Neurobiology and Neurosciences, Other; Neuropharmacology; Neuroscience	Advanced	Dartmouth College	207 Parkhurst Hall, Hanover, New Hampshire 03755-3529	www.dartmouth.edu	4-year, Private not-for-profit	Bachelor's degree;Master's degree;Doctor's degree - research/scholarship;Doctor's degree - professional practice	Town: Remote	Yes	6298	4289	95%	NA	Fall 2008	$21,277	-	182670	00257300
Neuroanatomy; Neurobiology and Anatomy; Neurobiology and Behavior; Neurobiology and Neurosciences, Other; Neuropharmacology; Neuroscience	Advanced	Delaware State University	1200 N. Dupont Highway, Dover, Delaware 19901	www.desu.edu	4-year, Public	Bachelor's degree;Master's degree;Doctor's degree - research/scholarship	City: Small	Yes	4397	4012	43%	NA	Fall 2008	$12,603	-	130934	00142800
Neuroanatomy; Neurobiology and Anatomy; Neurobiology and Behavior; Neurobiology and Neurosciences, Other; Neuropharmacology; Neuroscience	Advanced	Drexel University	3141 Chestnut St, Philadelphia, Pennsylvania 19104	www.drexel.edu	4-year, Private not-for-profit	Less than one year certificate;One but less than two years certificate;Associate's degree;Bachelor's degree;Postbaccalaureate certificate;Master's degree;Post-master's certificate;Doctor's degree - research/scholarship;Doctor's degree - professional practice;Doctor's degree - other	City: Large	Yes	26359	16896	67%	24%	Fall 2008	$37,244	-	212054	00325600
Neuroanatomy; Neurobiology and Anatomy; Neurobiology and Behavior; Neurobiology and Neurosciences, Other; Neuropharmacology; Neuroscience	Advanced	Duke University	103 Allen Bldg, Durham, North Carolina 27708	WWW.DUKE.EDU	4-year, Private not-for-profit	Bachelor's degree;Postbaccalaureate certificate;Master's degree;Doctor's degree - research/scholarship;Doctor's degree - professional practice	City: Midsize	Yes	15856	6626	95%	NA	Fall 2008	$21,764	-	198419	00292000
Neuroanatomy; Neurobiology and Anatomy; Neurobiology and Behavior; Neurobiology and Neurosciences, Other; Neuropharmacology; Neuroscience	Advanced	Fairleigh Dickinson University-Metropolitan Campus	1000 River Rd, Teaneck, New Jersey 07666	www.fdu.edu	4-year, Private not-for-profit	Less than one year certificate;Associate's degree;Bachelor's degree;Postbaccalaureate certificate;Master's degree;Post-master's certificate;Doctor's degree - research/scholarship;Doctor's degree - professional practice	Suburb: Large	Yes	8777	6051	48%	NA	Fall 2008	$17,540	-	184603	00260700
Neuroanatomy; Neurobiology and Anatomy; Neurobiology and Behavior; Neurobiology and Neurosciences, Other; Neuropharmacology; Neuroscience	Advanced	Florida State University	222 S. Copeland Street, Tallahassee, Florida 32306-1037	www.fsu.edu	4-year, Public	Associate's degree;Bachelor's degree;Master's degree;Post-master's certificate;Doctor's degree - research/scholarship;Doctor's degree - professional practice	City: Midsize	Yes	41226	32948	79%	7%	Fall 2008	$16,737	-	134097	00148900
Neuroanatomy; Neurobiology and Anatomy; Neurobiology and Behavior; Neurobiology and Neurosciences, Other; Neuropharmacology; Neuroscience	Advanced	Gallaudet University	800 Florida Ave, NE, Washington, District of Columbia 20002-3695	www.gallaudet.edu	4-year, Private not-for-profit	One but less than two years certificate;Bachelor's degree;Postbaccalaureate certificate;Master's degree;Post-master's certificate;Doctor's degree - research/scholarship;Doctor's degree - other	City: Large	Yes	1488	1031	46%	15%	Fall 2008	$14,080	-	131450	00144300
Neuroanatomy; Neurobiology and Anatomy; Neurobiology and Behavior; Neurobiology and Neurosciences, Other; Neuropharmacology; Neuroscience	Advanced	George Mason University	4400 University Dr, Fairfax, Virginia 22030-4444	www.gmu.edu	4-year, Public	Bachelor's degree;Postbaccalaureate certificate;Master's degree;Post-master's certificate;Doctor's degree - research/scholarship;Doctor's degree - professional practice	Suburb: Large	Yes	33729	22349	67%	20%	Fall 2008	$17,347	-	232186	00374900
Neuroanatomy; Neurobiology and Anatomy; Neurobiology and Behavior; Neurobiology and Neurosciences, Other; Neuropharmacology; Neuroscience	Advanced	Georgetown University	37th and O St NW, Washington, District of Columbia 20057-0001	www.georgetown.edu	4-year, Private not-for-profit	One but less than two years certificate;Bachelor's degree;Postbaccalaureate certificate;Master's degree;Doctor's degree - research/scholarship;Doctor's degree - professional practice	City: Large	Yes	17858	7595	95%	NA	Fall 2008	$25,786	-	131496	00144500
Neuroanatomy; Neurobiology and Anatomy; Neurobiology and Behavior; Neurobiology and Neurosciences, Other; Neuropharmacology; Neuroscience	Advanced	Georgia Regents University	1120 Fifteenth St, Augusta, Georgia 30912	www.gru.edu	4-year, Public	Associate's degree;Bachelor's degree;Postbaccalaureate certificate;Master's degree;Post-master's certificate;Doctor's degree - research/scholarship;Doctor's degree - professional practice	City: Midsize	Yes	7988	5225	30%	15%	Fall 2008	$7,667	-	482149	00157900
Neuroanatomy; Neurobiology and Anatomy; Neurobiology and Behavior; Neurobiology and Neurosciences, Other; Neuropharmacology; Neuroscience	Advanced	Georgia State University	33 gilmer st, Atlanta, Georgia 30303-3083	www.gsu.edu	4-year, Public	Bachelor's degree;Postbaccalaureate certificate;Master's degree;Post-master's certificate;Doctor's degree - research/scholarship;Doctor's degree - professional practice	City: Large	Yes	32556	25328	53%	17%	Fall 2008	$15,609	-	139940	00157400
Neuroanatomy; Neurobiology and Anatomy; Neurobiology and Behavior; Neurobiology and Neurosciences, Other; Neuropharmacology; Neuroscience	Advanced	Harvard University	Massachusetts Hall, Cambridge, Massachusetts 02138	www.harvard.edu	4-year, Private not-for-profit	Associate's degree;Bachelor's degree;Postbaccalaureate certificate;Master's degree;Post-master's certificate;Doctor's degree - research/scholarship;Doctor's degree - professional practice	City: Midsize	Yes	28791	10338	98%	NA	Fall 2008	$15,095	-	166027	00215500
Neuroanatomy; Neurobiology and Anatomy; Neurobiology and Behavior; Neurobiology and Neurosciences, Other; Neuropharmacology; Neuroscience	Advanced	Indiana University-Bloomington	107 South Indiana Ave., Bloomington, Indiana 47405-7000	www.iub.edu	4-year, Public	One but less than two years certificate;Associate's degree;Bachelor's degree;Postbaccalaureate certificate;Master's degree;Post-master's certificate;Doctor's degree - research/scholarship;Doctor's degree - professional practice	City: Small	Yes	46416	36419	78%	14%	Fall 2008	$11,573	-	151351	00180900
Neuroanatomy; Neurobiology and Anatomy; Neurobiology and Behavior; Neurobiology and Neurosciences, Other; Neuropharmacology; Neuroscience	Advanced	Indiana University-Purdue University-Indianapolis	425 University Blvd, Indianapolis, Indiana 46202-5143	www.iupui.edu	4-year, Public	One but less than two years certificate;Associate's degree;Bachelor's degree;Postbaccalaureate certificate;Master's degree;Post-master's certificate;Doctor's degree - research/scholarship;Doctor's degree - professional practice	City: Large	Yes	30690	22525	43%	25%	Fall 2008	$10,979	-	151111	00181300
Neuroanatomy; Neurobiology and Anatomy; Neurobiology and Behavior; Neurobiology and Neurosciences, Other; Neuropharmacology; Neuroscience	Advanced	Inter American University of Puerto Rico-Metro	Highway #1 Km 16 3 Corner Francisco Sein St, San Juan, Puerto Rico 00919	www.metro.inter.edu/index.asp	4-year, Private not-for-profit	One but less than two years certificate;Associate's degree;Two but less than 4 years certificate;Bachelor's degree;Postbaccalaureate certificate;Master's degree;Post-master's certificate;Doctor's degree - research/scholarship	City: Large	No	9649	7016	32%	2%	Fall 2008	$8,102	-	242653	00393800
Neuroanatomy; Neurobiology and Anatomy; Neurobiology and Behavior; Neurobiology and Neurosciences, Other; Neuropharmacology; Neuroscience	Advanced	Iowa State University	3410 Beardshear Hall, Ames, Iowa 50011-2030	www.iastate.edu	4-year, Public	Bachelor's degree;Postbaccalaureate certificate;Master's degree;Post-master's certificate;Doctor's degree - research/scholarship;Doctor's degree - professional practice	City: Small	Yes	34435	28893	69%	24%	Fall 2008	$13,899	-	153603	00186900
Neuroanatomy; Neurobiology and Anatomy; Neurobiology and Behavior; Neurobiology and Neurosciences, Other; Neuropharmacology; Neuroscience	Advanced	Johns Hopkins University	3400 N Charles St, Mason Hall, Baltimore, Maryland 21218-2688	www.jhu.edu	4-year, Private not-for-profit	Two but less than 4 years certificate;Bachelor's degree;Postbaccalaureate certificate;Master's degree;Post-master's certificate;Doctor's degree - research/scholarship;Doctor's degree - professional practice	City: Large	Yes	21372	6357	93%	2%	Fall 2008	$25,207	-	162928	00207700
Neuroanatomy; Neurobiology and Anatomy; Neurobiology and Behavior; Neurobiology and Neurosciences, Other; Neuropharmacology; Neuroscience	Advanced	Kent State University at Kent	Executive Office, 2nd Floor Library, Kent, Ohio 44242-0001	www.kent.edu	4-year, Public	Less than one year certificate;One but less than two years certificate;Bachelor's degree;Postbaccalaureate certificate;Master's degree;Post-master's certificate;Doctor's degree - research/scholarship;Doctor's degree - professional practice	Suburb: Large	Yes	29477	23328	55%	25%	Fall 2008	$18,106	-	203517	00305100
Neuroanatomy; Neurobiology and Anatomy; Neurobiology and Behavior; Neurobiology and Neurosciences, Other; Neuropharmacology; Neuroscience	Advanced	Lehigh University	27 Memorial Drive West, Bethlehem, Pennsylvania 18015	www.lehigh.edu	4-year, Private not-for-profit	Bachelor's degree;Master's degree;Post-master's certificate;Doctor's degree - research/scholarship	City: Small	Yes	7119	5062	87%	NA	Fall 2008	$27,848	-	213543	00328900
Neuroanatomy; Neurobiology and Anatomy; Neurobiology and Behavior; Neurobiology and Neurosciences, Other; Neuropharmacology; Neuroscience	Advanced	Louisiana State University Health Sciences Center-New Orleans	433 Bolivar St, New Orleans, Louisiana 70112-2223	www.lsuhsc.edu	4-year, Public	Associate's degree;Bachelor's degree;Master's degree;Post-master's certificate;Doctor's degree - research/scholarship;Doctor's degree - professional practice	City: Large	Yes	2828	911	NA	NA	Fall 2008	NA	-	159373	00201400
Neuroanatomy; Neurobiology and Anatomy; Neurobiology and Behavior; Neurobiology and Neurosciences, Other; Neuropharmacology; Neuroscience	Advanced	Loyola University Chicago	1032 W. Sheridan Rd, Chicago, Illinois 60660	www.luc.edu	4-year, Private not-for-profit	Less than one year certificate;One but less than two years certificate;Bachelor's degree;Postbaccalaureate certificate;Master's degree;Post-master's certificate;Doctor's degree - research/scholarship;Doctor's degree - professional practice	City: Large	Yes	15902	10322	73%	NA	Fall 2008	$31,069	-	146719	00171000
Neuroanatomy; Neurobiology and Anatomy; Neurobiology and Behavior; Neurobiology and Neurosciences, Other; Neuropharmacology; Neuroscience	Advanced	Massachusetts Institute of Technology	77 Massachusetts Avenue, Cambridge, Massachusetts 02139-4307	web.mit.edu/student/	4-year, Private not-for-profit	Bachelor's degree;Master's degree;Doctor's degree - research/scholarship	City: Midsize	Yes	11319	4512	91%	NA	Fall 2008	$22,212	-	166683	00217800
Neuroanatomy; Neurobiology and Anatomy; Neurobiology and Behavior; Neurobiology and Neurosciences, Other; Neuropharmacology; Neuroscience	Advanced	Mayo Graduate School	200 1st St SW, Rochester, Minnesota 55905	www.mayo.edu/mgs/index.html	4-year, Private not-for-profit	Master's degree;Doctor's degree - research/scholarship	City: Midsize	No	291		NA	NA	Fall 2008	NA	-	365426	01173206
Neuroanatomy; Neurobiology and Anatomy; Neurobiology and Behavior; Neurobiology and Neurosciences, Other; Neuropharmacology; Neuroscience	Advanced	Michigan State University	East Lansing, Michigan 48824-1046	www.msu.edu	4-year, Public	One but less than two years certificate;Bachelor's degree;Master's degree;Post-master's certificate;Doctor's degree - research/scholarship;Doctor's degree - professional practice	City: Small	Yes	50081	38786	79%	13%	Fall 2008	$14,791	-	171100	00229000
Neuroanatomy; Neurobiology and Anatomy; Neurobiology and Behavior; Neurobiology and Neurosciences, Other; Neuropharmacology; Neuroscience	Advanced	New York University	70 Washington Sq South, New York, New York 10012-1091	www.nyu.edu	4-year, Private not-for-profit	Less than one year certificate;One but less than two years certificate;Associate's degree;Bachelor's degree;Postbaccalaureate certificate;Master's degree;Post-master's certificate;Doctor's degree - research/scholarship;Doctor's degree - professional practice;Doctor's degree - other	City: Large	Yes	49274	24985	83%	NA	Fall 2008	$35,543	-	193900	00278500
Neuroanatomy; Neurobiology and Anatomy; Neurobiology and Behavior; Neurobiology and Neurosciences, Other; Neuropharmacology; Neuroscience	Advanced	Northwestern University	633 Clark St, Evanston, Illinois 60208	www.northwestern.edu	4-year, Private not-for-profit	One but less than two years certificate;Bachelor's degree;Postbaccalaureate certificate;Master's degree;Post-master's certificate;Doctor's degree - research/scholarship;Doctor's degree - professional practice	City: Small	Yes	21554	9048	93%	NA	Fall 2008	$28,667	-	147767	00173900
Neuroanatomy; Neurobiology and Anatomy; Neurobiology and Behavior; Neurobiology and Neurosciences, Other; Neuropharmacology; Neuroscience	Advanced	Ohio State University-Main Campus	190 N. Oval Mall, Columbus, Ohio 43210	www.osu.edu/	4-year, Public	One but less than two years certificate;Associate's degree;Bachelor's degree;Postbaccalaureate certificate;Master's degree;Post-master's certificate;Doctor's degree - research/scholarship;Doctor's degree - professional practice	City: Large	Yes	58322	44741	83%	10%	Fall 2008	$18,215	-	204796	00309000
Neuroanatomy; Neurobiology and Anatomy; Neurobiology and Behavior; Neurobiology and Neurosciences, Other; Neuropharmacology; Neuroscience	Advanced	Oregon Health & Science University	3181 SW Sam Jackson Park Rd, Portland, Oregon 97239-3098	www.ohsu.edu/xd	4-year, Public	Bachelor's degree;Postbaccalaureate certificate;Master's degree;Post-master's certificate;Doctor's degree - research/scholarship;Doctor's degree - professional practice	City: Large	No	2861	847	NA	NA	Fall 2008	NA	-	209490	00488200
Neuroanatomy; Neurobiology and Anatomy; Neurobiology and Behavior; Neurobiology and Neurosciences, Other; Neuropharmacology; Neuroscience	Advanced	Pennsylvania State University-College of Medicine	500 University Drive, Hershey, Pennsylvania 17033	www.pennstatehershey.org/web/college/home	4-year, Public	Postbaccalaureate certificate;Master's degree;Doctor's degree - research/scholarship;Doctor's degree - professional practice	Suburb: Large	No	842		NA	NA	Fall 2008	NA	-	214616	00332901
Neuroanatomy; Neurobiology and Anatomy; Neurobiology and Behavior; Neurobiology and Neurosciences, Other; Neuropharmacology; Neuroscience	Advanced	Pennsylvania State University-Main Campus	201 Old Main, University Park, Pennsylvania 16802	www.psu.edu/	4-year, Public	Less than one year certificate;One but less than two years certificate;Associate's degree;Bachelor's degree;Postbaccalaureate certificate;Master's degree;Doctor's degree - research/scholarship;Doctor's degree - professional practice	City: Small	Yes	47040	40541	86%	NA	Fall 2008	$24,220	-	214777	00332900
Neuroanatomy; Neurobiology and Anatomy; Neurobiology and Behavior; Neurobiology and Neurosciences, Other; Neuropharmacology; Neuroscience	Advanced	Princeton University	1 Nassau Hall, Princeton, New Jersey 08544-0070	www.princeton.edu	4-year, Private not-for-profit	Bachelor's degree;Master's degree;Doctor's degree - research/scholarship	Suburb: Large	Yes	8088	5391	97%	NA	Fall 2008	$18,885	-	186131	00262700
Neuroanatomy; Neurobiology and Anatomy; Neurobiology and Behavior; Neurobiology and Neurosciences, Other; Neuropharmacology; Neuroscience	Advanced	Rosalind Franklin University of Medicine and Science	3333 Green Bay Road, North Chicago, Illinois 60064-3095	www.rosalindfranklin.edu/	4-year, Private not-for-profit	Postbaccalaureate certificate;Master's degree;Doctor's degree - research/scholarship;Doctor's degree - professional practice	Suburb: Large	Yes	2191		NA	NA	Fall 2008	NA	-	145558	00165900
Neuroanatomy; Neurobiology and Anatomy; Neurobiology and Behavior; Neurobiology and Neurosciences, Other; Neuropharmacology; Neuroscience	Advanced	Rush University	600 S. Paulina St. STE 440, Chicago, Illinois 60612	WWW.RUSHU.RUSH.EDU	4-year, Private not-for-profit	Bachelor's degree;Postbaccalaureate certificate;Master's degree;Post-master's certificate;Doctor's degree - research/scholarship;Doctor's degree - professional practice;Doctor's degree - other	City: Large	Yes	2457	143	NA	NA	Fall 2008	NA	-	148511	00980000
Neuroanatomy; Neurobiology and Anatomy; Neurobiology and Behavior; Neurobiology and Neurosciences, Other; Neuropharmacology; Neuroscience	Advanced	Rutgers University-New Brunswick	83 Somerset St, New Brunswick, New Jersey 08901-1281	www.rutgers.edu/	4-year, Public	One but less than two years certificate;Associate's degree;Bachelor's degree;Postbaccalaureate certificate;Master's degree;Post-master's certificate;Doctor's degree - research/scholarship;Doctor's degree - professional practice	City: Small	Yes	48378	34544	81%	11%	Fall 2008	$15,917	-	186380	00262900
Neuroanatomy; Neurobiology and Anatomy; Neurobiology and Behavior; Neurobiology and Neurosciences, Other; Neuropharmacology; Neuroscience	Advanced	Rutgers University-Newark	249 University Avenue, Blumenthal Hall, Newark, New Jersey 07102	www.rutgers.edu	4-year, Public	One but less than two years certificate;Associate's degree;Bachelor's degree;Postbaccalaureate certificate;Master's degree;Post-master's certificate;Doctor's degree - research/scholarship;Doctor's degree - professional practice	City: Large	Yes	11314	7408	66%	18%	Fall 2008	$9,858	-	186399	00262902
Neuroanatomy; Neurobiology and Anatomy; Neurobiology and Behavior; Neurobiology and Neurosciences, Other; Neuropharmacology; Neuroscience	Advanced	Stanford University	Stanford, California 94305	www.stanford.edu/	4-year, Private not-for-profit	Bachelor's degree;Master's degree;Post-master's certificate;Doctor's degree - research/scholarship;Doctor's degree - professional practice	Suburb: Large	Yes	16963	7019	95%	NA	Fall 2008	$17,952	-	243744	00130500
Neuroanatomy; Neurobiology and Anatomy; Neurobiology and Behavior; Neurobiology and Neurosciences, Other; Neuropharmacology; Neuroscience	Advanced	Stony Brook University	310 Administration Building, Stony Brook, New York 11794	www.stonybrook.edu	4-year, Public	Bachelor's degree;Postbaccalaureate certificate;Master's degree;Post-master's certificate;Doctor's degree - research/scholarship;Doctor's degree - professional practice	Suburb: Large	Yes	24607	16480	69%	21%	Fall 2008	$13,352	-	196097	00283800
Neuroanatomy; Neurobiology and Anatomy; Neurobiology and Behavior; Neurobiology and Neurosciences, Other; Neuropharmacology; Neuroscience	Advanced	SUNY Downstate Medical Center	450 Clarkson Ave, Brooklyn, New York 11203-2098	www.downstate.edu/	4-year, Public	Bachelor's degree;Postbaccalaureate certificate;Master's degree;Post-master's certificate;Doctor's degree - research/scholarship;Doctor's degree - professional practice	City: Large	Yes	1865	344	NA	NA	Fall 2008	NA	-	196255	00283900
[truncated: 219 more rows]
